# Supplementary material for: Identification of Novel 2,4,5-Trisubstituted Pyrimidines as Potent Dual Inhibitors of Plasmodial PfGSK3/PfPK6 with Activity against Blood Stage Parasites In Vitro
Source: PubMed Central journal article supplement — J Med Chem. 2022 Sep 27;65(19):13172–97. doi: 10.1021/acs.jmedchem.2c00996 (PMC9574854; doi:10.1021/acs.jmedchem.2c00996), 2022-09-27

## Supporting Information

### Identification of Novel 2,4,5-Trisubstituted Pyrimidines as Potent Dual Inhibitors of Plasmodial *PfGSK3/PfPK6* with Activity Against Blood Stage Parasites *in vitro*

Kareem A. Galal<sup>1</sup>, Anna Truong<sup>2</sup>, Frank Kwarcinski<sup>3</sup>, Chandi de Silva<sup>3</sup>, Krisha Avalani<sup>3</sup>, Tammy M. Havener<sup>1</sup>, Michael E. Chirgwin<sup>2</sup>, Eric Merten<sup>1</sup>, Han Wee Ong<sup>1</sup>, Caleb Willis<sup>3</sup>, Ahmad Abdelwaly<sup>4</sup>, Mohamed A. Helal<sup>4,5</sup>, Emily R. Derbyshire<sup>2,6\*</sup>, Reena Zutshi<sup>3\*</sup>, David H. Drewry<sup>1,7\*</sup>

<sup>1</sup>Structural Genomics Consortium and Division of Chemical Biology and Medicinal Chemistry, Eshelman School of Pharmacy, University of North Carolina at Chapel Hill, Chapel Hill, NC 27599, USA;

<sup>2</sup>Department of Chemistry, Duke University, 124 Science Drive, Durham, NC 27708, USA;

<sup>3</sup>Luceome Biotechnologies, L.L.C, 1665 E. 18th Street, Suite 106, Tucson, AZ 85719, USA;

<sup>4</sup>Biomedical Sciences Program, University of Science and Technology, Zewail City of Science and Technology, Giza 12587, Egypt;

<sup>5</sup>Medicinal Chemistry Department, Faculty of Pharmacy, Suez Canal University, Ismailia 41522, Egypt;

<sup>6</sup>Department of Molecular Genetics and Microbiology, Duke University Medical Center, 213 Research Drive, Durham, NC 27710, USA;

<sup>7</sup>Lineberger Comprehensive Cancer Center, Department of Medicine, School of Medicine, University of North Carolina at Chapel Hill, Chapel Hill, NC 27599, USA

Corresponding author emails:

Emily M. Derbyshire: emily.derbyshire@duke.edu

Reena Zutshi: reena.zutshi@luceome.com

David H. Drewry: David.drewry@unc.edu

| Table of Contents                                                                                                                | Page |
|----------------------------------------------------------------------------------------------------------------------------------|------|
| Table S1. Ligand efficiency values of <b>IKK16</b> and best performing analogues.....                                            | S2   |
| Table S2. Physicochemical properties of <b>IKK16</b> and <b>23b-f</b> .....                                                      | S2   |
| Table S3. Calculated LogD values of <b>9f</b> and <b>9g</b> .....                                                                | S3   |
| Table S4. Liver stage activity of <b>23b-e</b> with the associated host cell cytotoxicity.....                                   | S3   |
| Table S5. PDB codes of HsCDK2 & HsGSK-3 $\beta$ used as templates for the model building of <i>PfPK6</i> and <i>PfGSK3</i> ..... | S3   |
| <sup>1</sup> H and <sup>13</sup> C NMR spectra of compounds submitted for biological screening.....                              | S4   |
| HRMS spectra of compounds submitted for biological screening.....                                                                | S56  |
| HPLC traces of compounds submitted for biological screening.....                                                                 | S82  |

**Table S1. Ligand efficiency values of IKK16 and best performing analogues**

| Compound | <sup>a</sup> LE |
|----------|-----------------|
| IKK16    | 0.26            |
| 9g       | 0.28            |
| 18i      | 0.29            |
| 18j      | 0.30            |
| 18n      | 0.29            |
| 18r      | 0.30            |
| 23a      | 0.32            |
| 23b      | 0.33            |
| 23c      | 0.33            |
| 23d      | 0.34            |
| 23e      | 0.35            |
| 23f      | 0.34            |
| 23g      | 0.35            |

<sup>a</sup>Ligand efficiency was calculated as follows:  $PPK6$  pIC<sub>50</sub>/number of heavy atoms in the molecule

**Table S2. Physicochemical properties of IKK16 and 23b-f**

| Compound | <sup>a</sup> Kinetic solubility (μg/mL) | <sup>b</sup> Effective permeability (P <sub>e</sub> ) (cm/s) | <sup>c</sup> CLogP | <sup>e</sup> PSA (Polar surface area) |
|----------|-----------------------------------------|--------------------------------------------------------------|--------------------|---------------------------------------|
| IKK16    | 30                                      | 2.08 x10 <sup>-6</sup>                                       | 5.27               | 61.87                                 |
| 23b      | 56.3                                    | 1.36 x10 <sup>-6</sup>                                       | 5.09               | 63.07                                 |
| 23c      | 19.43                                   | 1.30 x10 <sup>-6</sup>                                       | 5.08               | 62.56                                 |
| 23d      | 55.28                                   | <1.75 x10 <sup>-7</sup>                                      | 5.21               | 64.36                                 |
| 23e      | 0.93                                    | <sup>d</sup> N/A                                             | 4.34               | 83.04                                 |
| 23f      | 0.5                                     | N/A                                                          | 4.16               | 83.04                                 |

<sup>a</sup>Kinetic solubility analysis was carried out in phosphate buffered saline solution (PBS) at pH 7.4 from 10 mM DMSO stock solutions.

<sup>b</sup>Permeability analysis was performed using a chamber separated by an immobilized artificial phospholipid membrane layer into a donor and an acceptor well. <sup>c</sup>ClogP and PSA were calculated using the QikProp ADME prediction software from Schrodinger Maestro version 12.9.137. <sup>d</sup>N/A: Below limit of quantitation in acceptor well

**Table S3. Calculated LogD values of 9f and 9g**

| Compound  | CLogD |
|-----------|-------|
| <b>9f</b> | 2     |
| <b>9g</b> | 2.7   |

cLogD values were calculated using Chemaxon

**Table S4. Liver stage activity of 23b-e with associated host cell cytotoxicity**

| Compound   | <i>P. berghei</i> liver stage <sup>a</sup> EC <sub>50</sub> (μM) | HepG2 <sup>b</sup> CC <sub>50</sub> (μM) |
|------------|------------------------------------------------------------------|------------------------------------------|
| <b>23b</b> | 5.2                                                              | 9.3                                      |
| <b>23c</b> | 2.4                                                              | 10.5                                     |
| <b>23d</b> | 2.8                                                              | 5.1                                      |
| <b>23e</b> | 3.4                                                              | 4.9                                      |

<sup>a</sup>EC<sub>50</sub> values are presented as mean values of two experiments performed in duplicate. <sup>b</sup>CC<sub>50</sub> was determined using the CellTiter-Fluor assay. Values are presented as the mean of two experiments performed in triplicate.

**Table S5. PDB codes of the HsCDK2 and HsGSK-3β used as templates for the model building of *Pf*PK6 and *Pf*GSK-3**

| <b><i>Pf</i>PK6</b>   |            |            |
|-----------------------|------------|------------|
| PDB ID                | Resolution | % Identity |
| 1h24                  | 2.70 Å     | 40.85      |
| 1oiu                  | 2.00 Å     | 40.85      |
| 4eom                  | 2.10 Å     | 40.13      |
| 1vyw                  | 2.30 Å     | 40.07      |
| 1e9h                  | 2.50 Å     | 39.81      |
| <b><i>Pf</i>GSK-3</b> |            |            |
| PDB ID                | Resolution | % Identity |
| 1r0e                  | 2.25 Å     | 57.45      |
| 5air                  | 2.53 Å     | 55.16      |
| 2o5k                  | 3.20 Å     | 54.97      |
| 4afj                  | 1.98 Å     | 54.68      |
| 3eb0                  | 2.65 Å     | 49.33      |







# 4-(Benzo[b]thiophen-2-yl)-N-(2-chlorophenyl)pyrimidin-2-amine (4d)

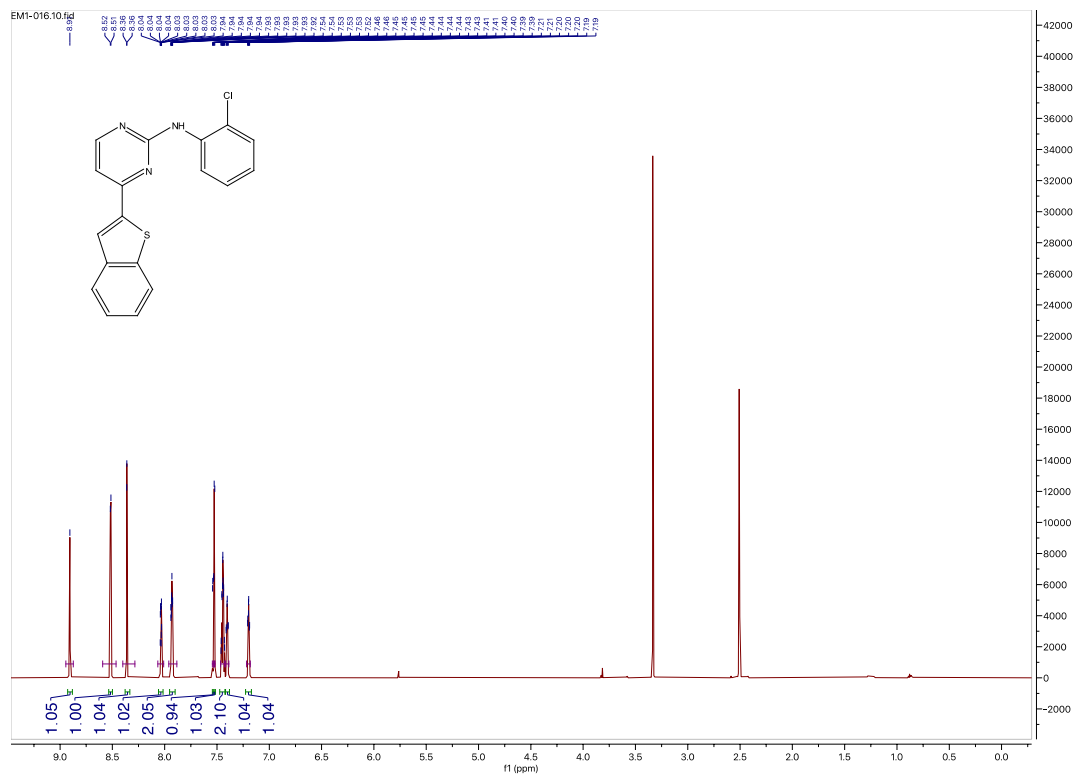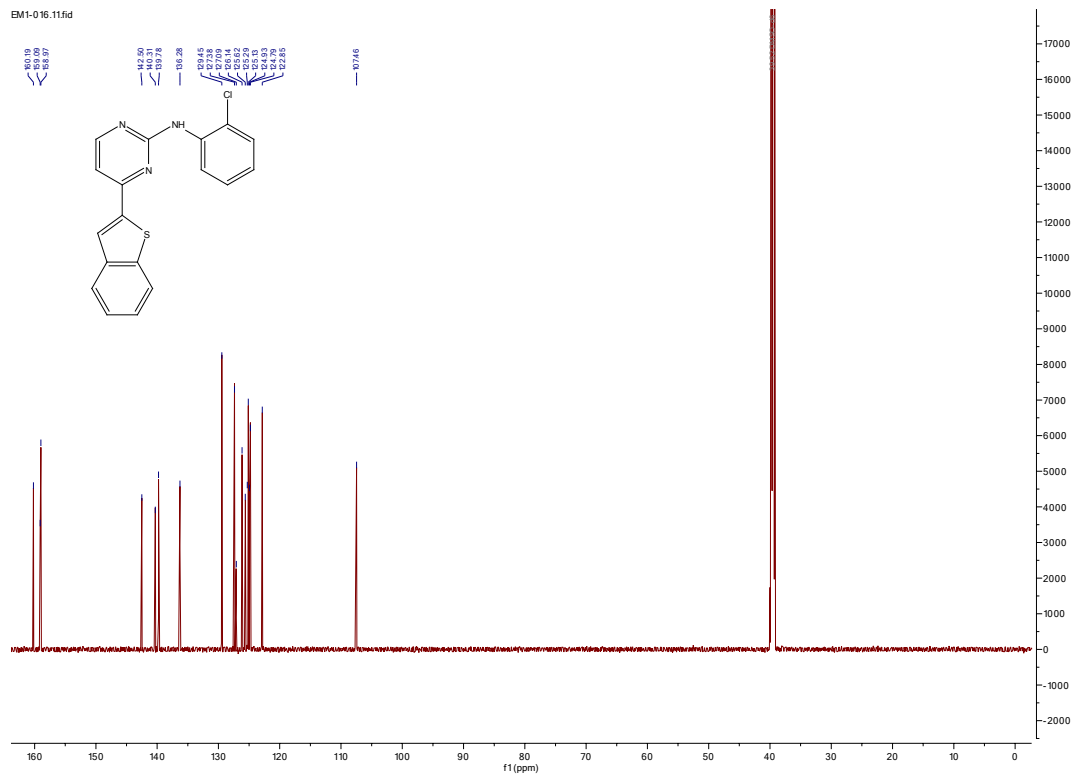







# 4-(Benzo[b]thiophen-2-yl)-N-(2-methoxyphenyl)pyrimidin-2-amine (4g)

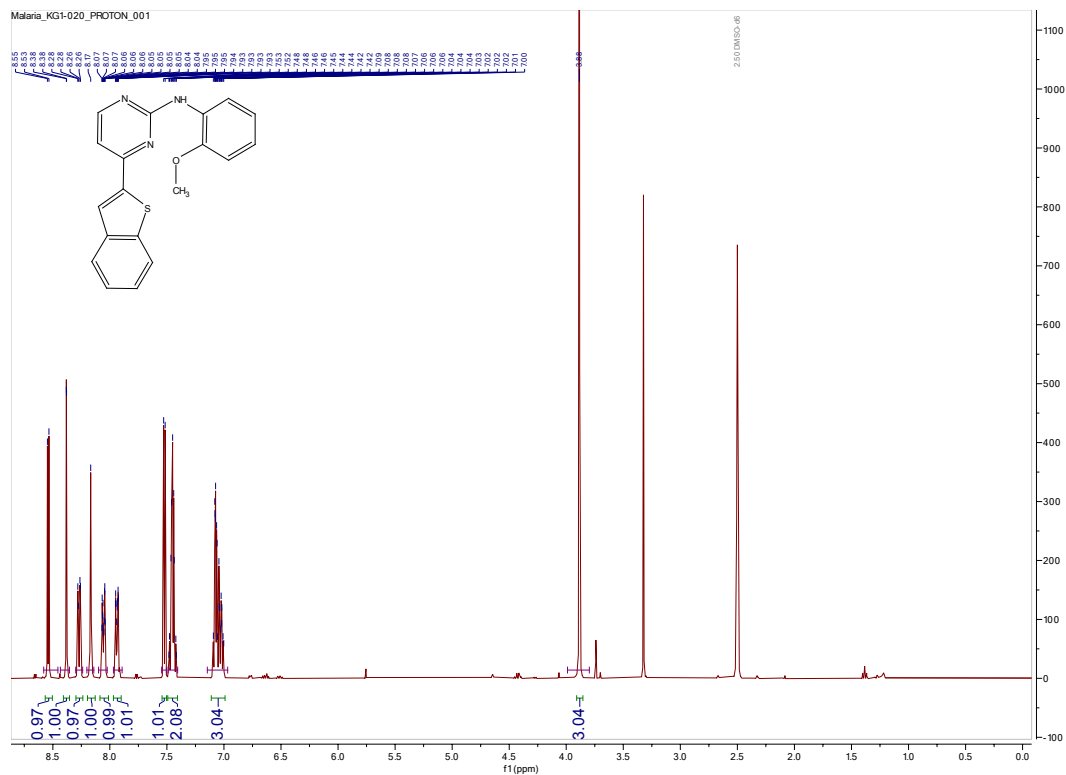





# 4-((4-(Benzo[b]thiophen-2-yl)pyrimidin-2-yl)amino)benzoic acid (6)

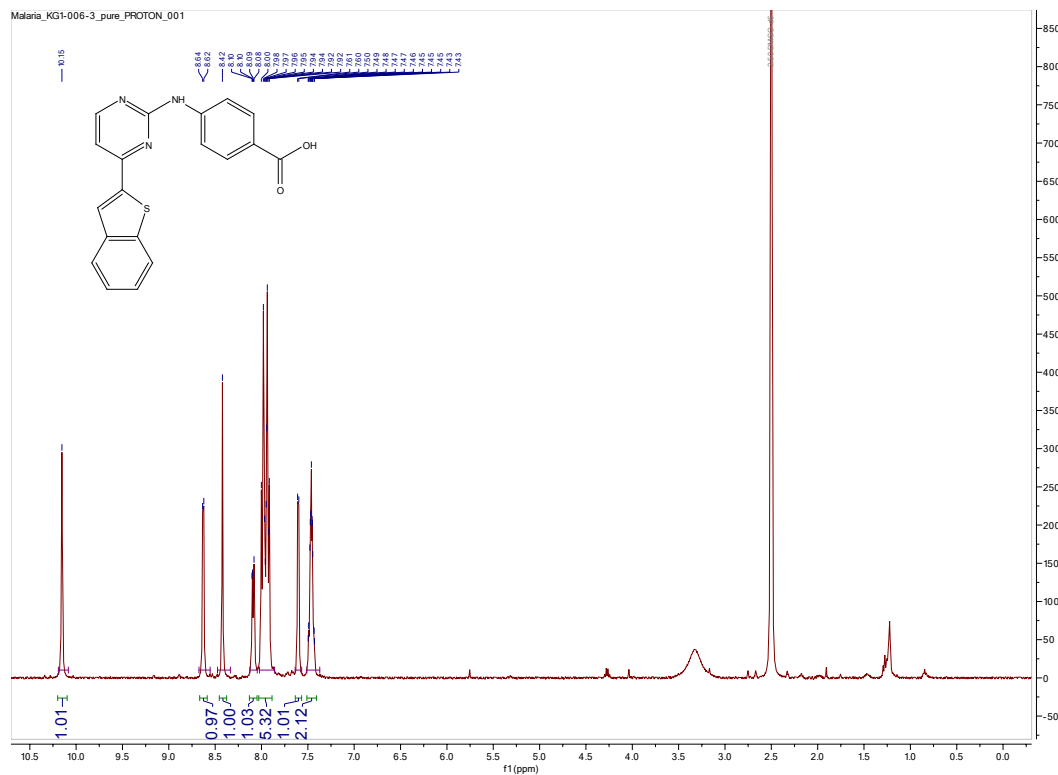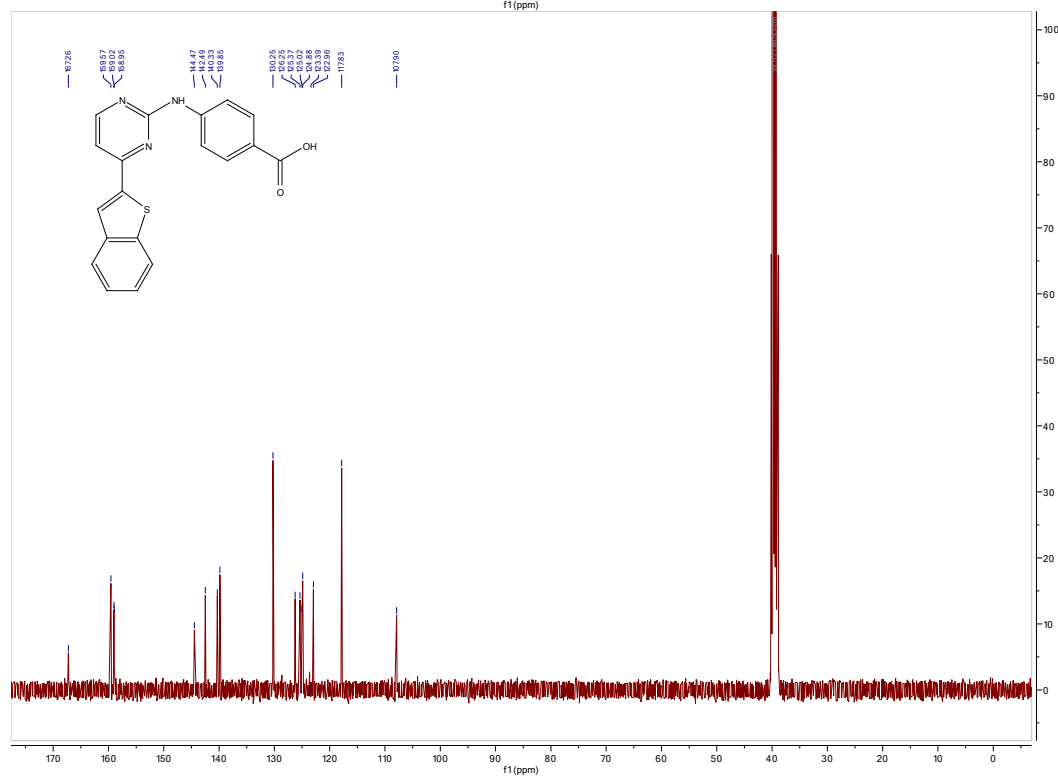



**(R)-4-((4-(Benzo[b]thiophen-2-yl)pyrimidin-2-yl)amino)phenyl)(4-(3-hydroxypyrrolidin-1-yl)piperidin-1-yl)methanone (8b)**

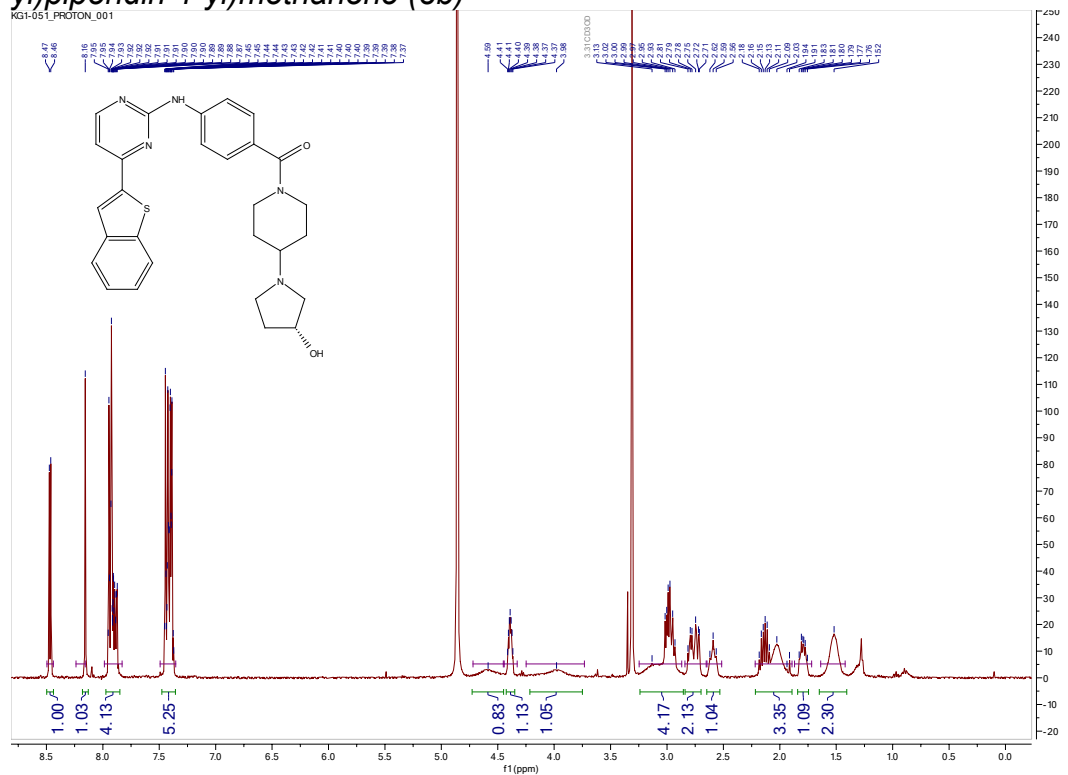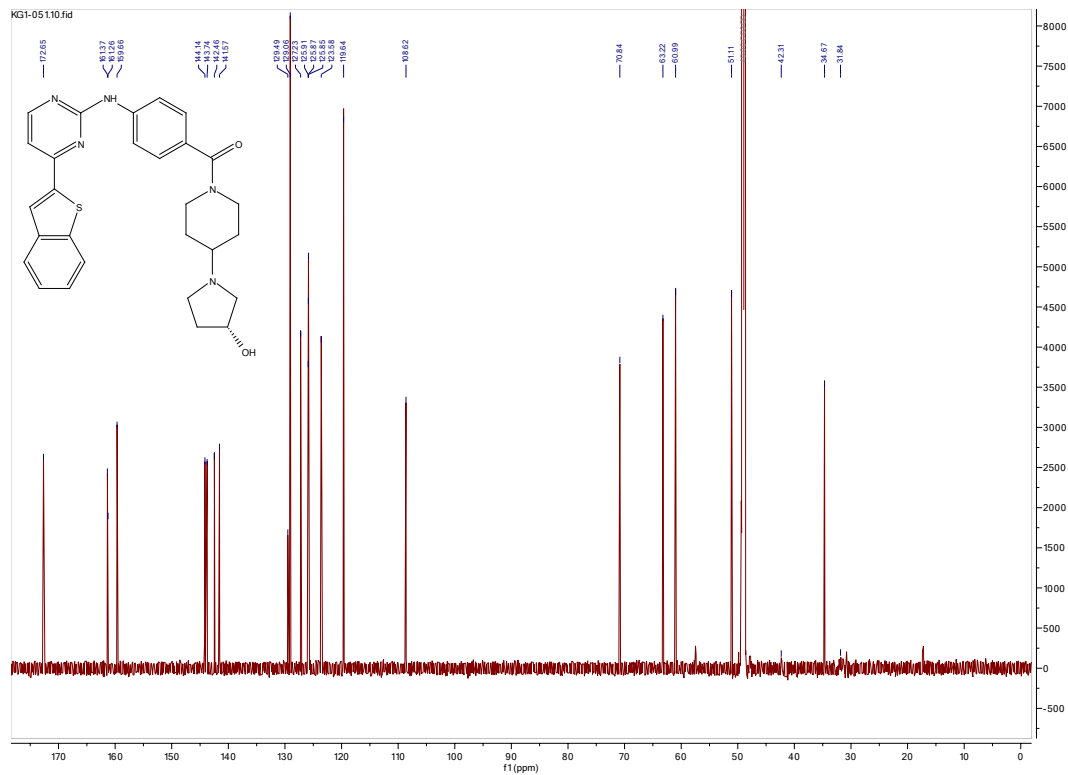









**4-((4-(Benzo[b]thiophen-2-yl)pyrimidin-2-yl)amino)phenyl)(piperazin-1-yl)methanone (9c)**

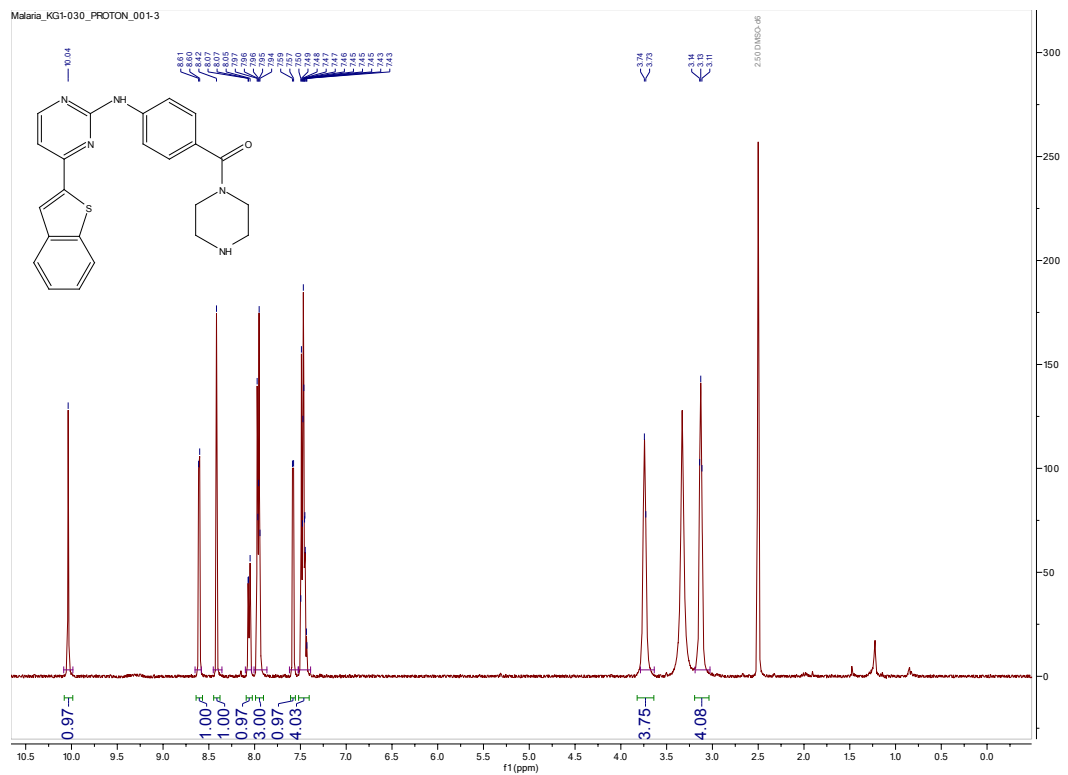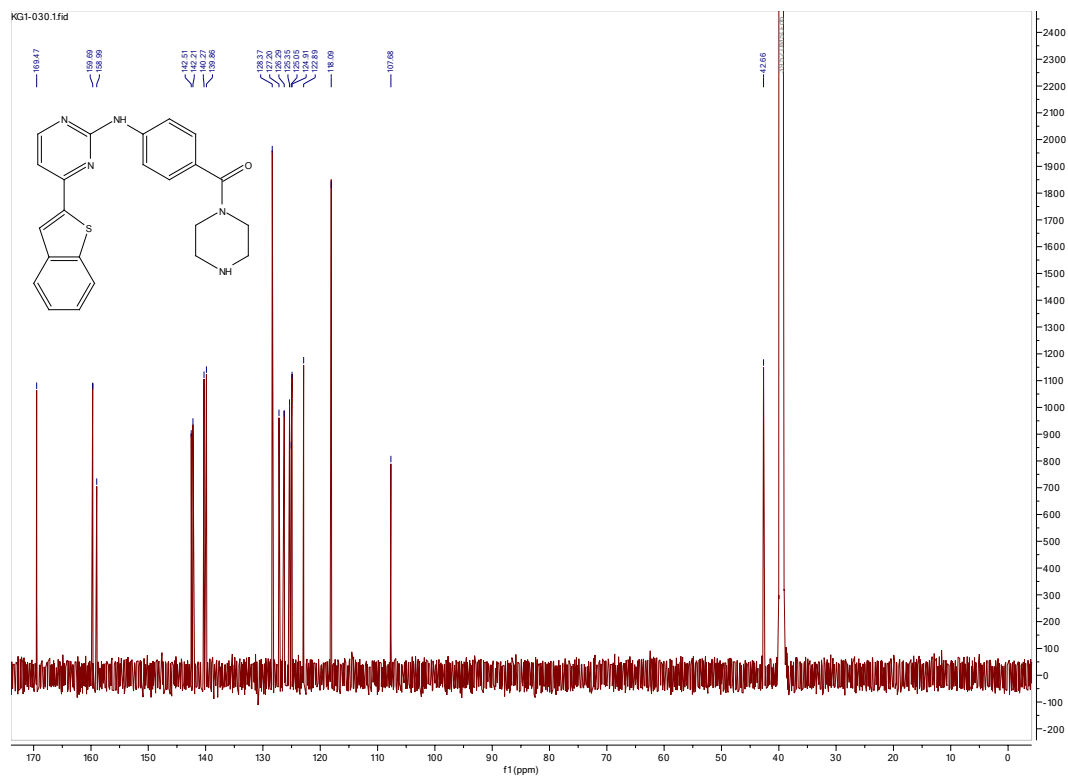

4-((4-(Benzo[b]thiophen-2-yl)pyrimidin-2-yl)amino)phenyl)(4-methylpiperazin-1-yl)methanone (9d)

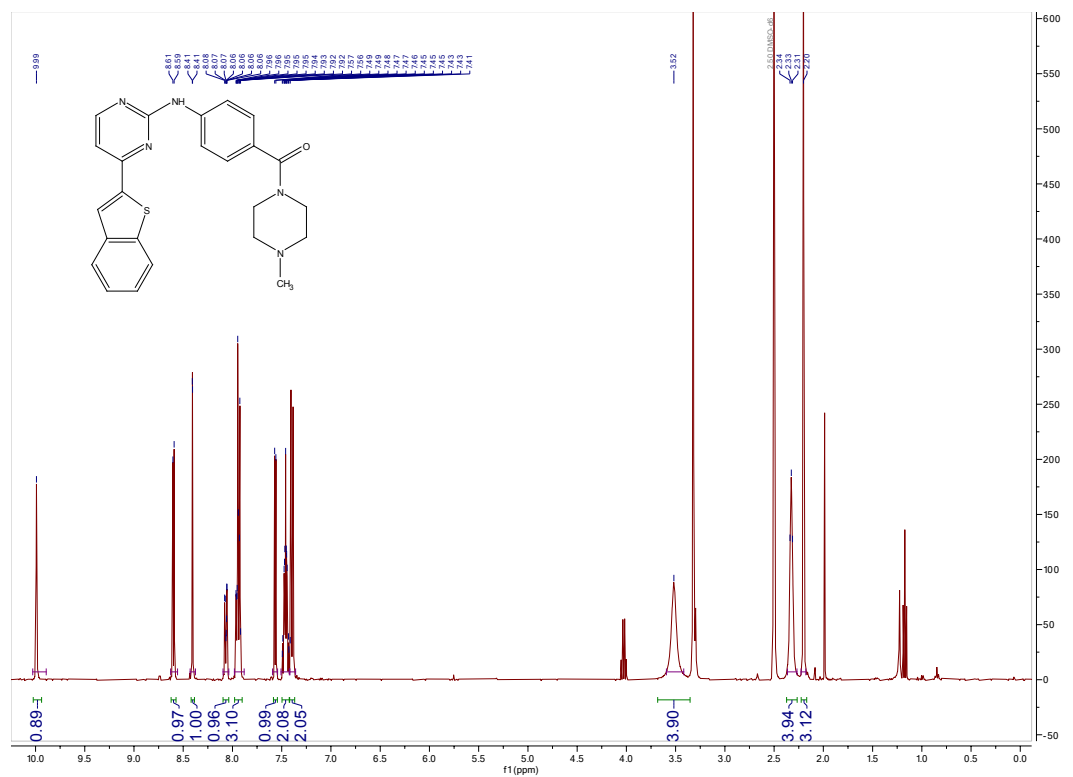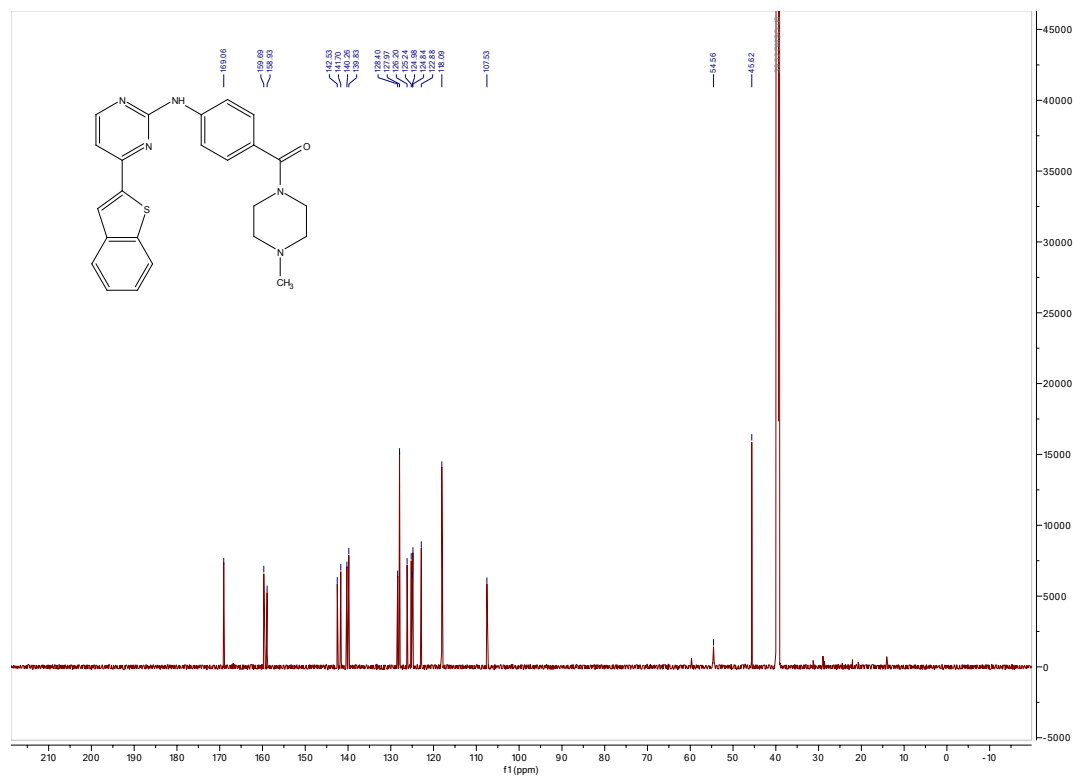







4-((4-(Benzo[b]thiophen-2-yl)pyrimidin-2-yl)amino)-N-(3-(dimethylamino)propyl)benzamide (9h)

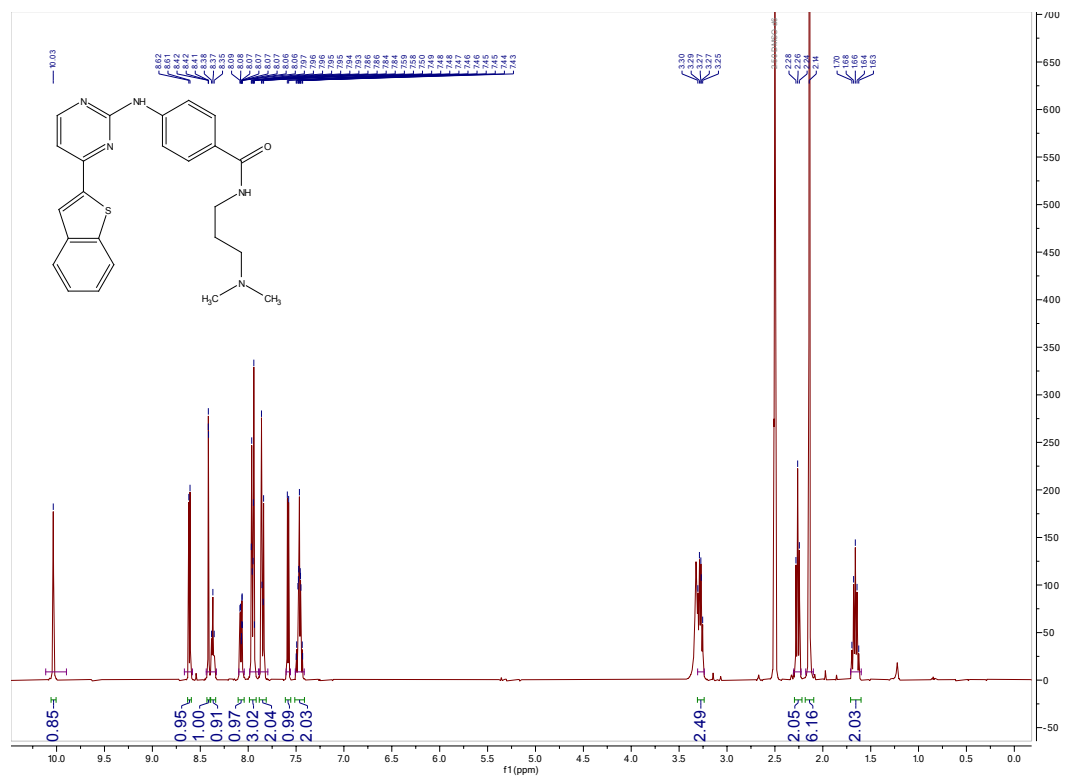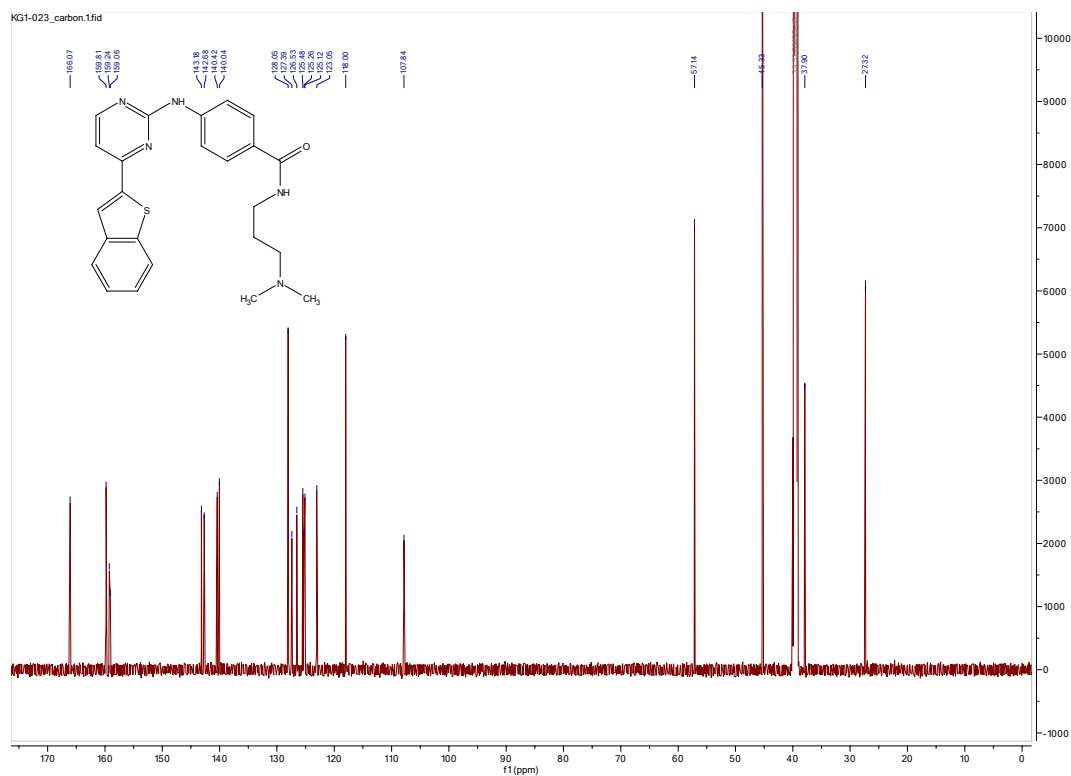





4-((4-(Benzo[b]thiophen-2-yl)pyrimidin-2-yl)amino)-N-cyclopropylbenzamide (9j)

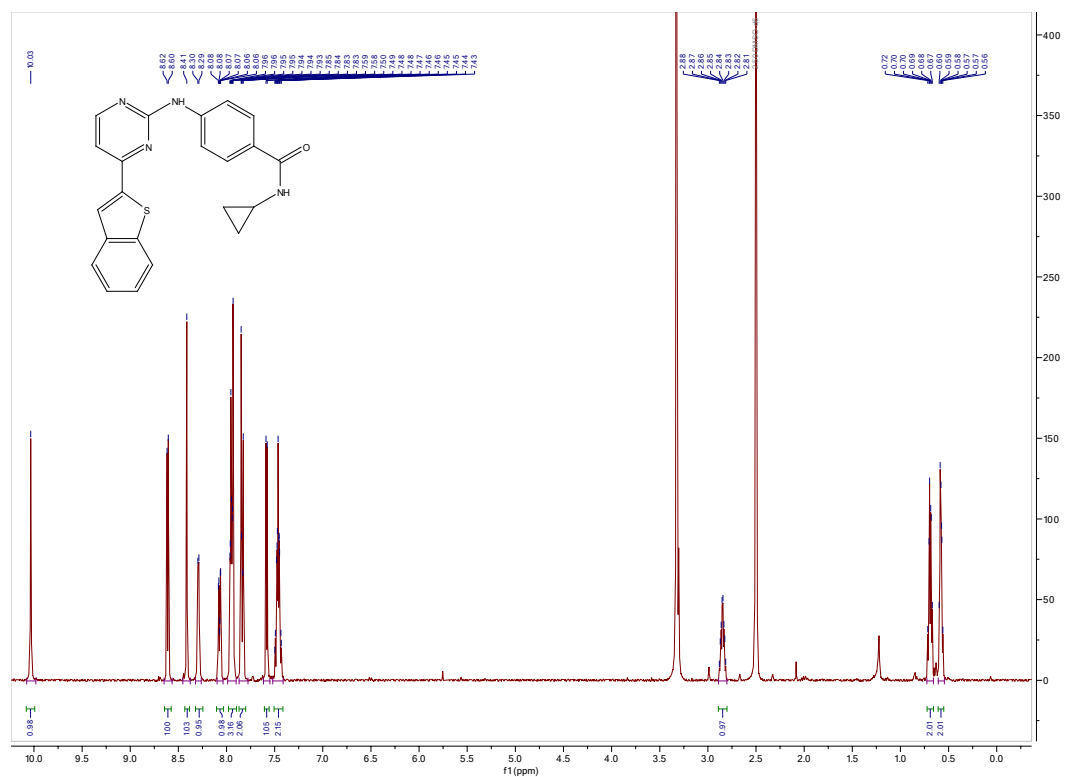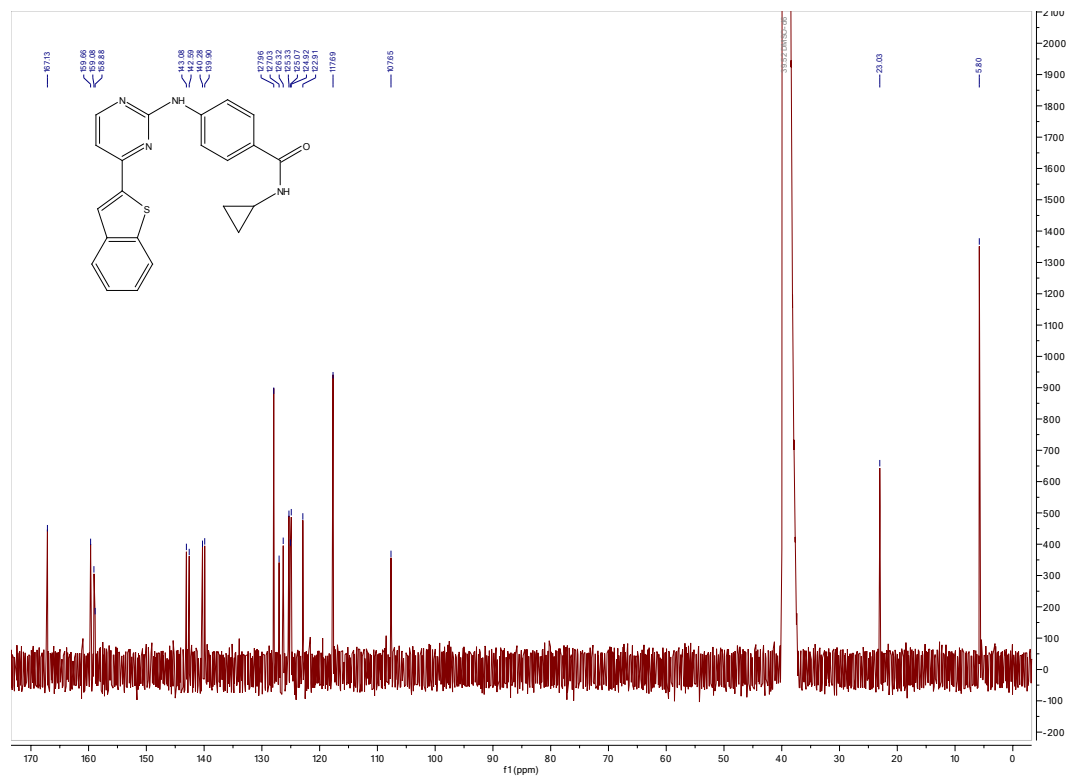

4-((4-(Benzo[b]thiophen-2-yl)pyrimidin-2-yl)amino)-N-(1-methyl-1H-pyrazol-4-yl)benzamide (9k)

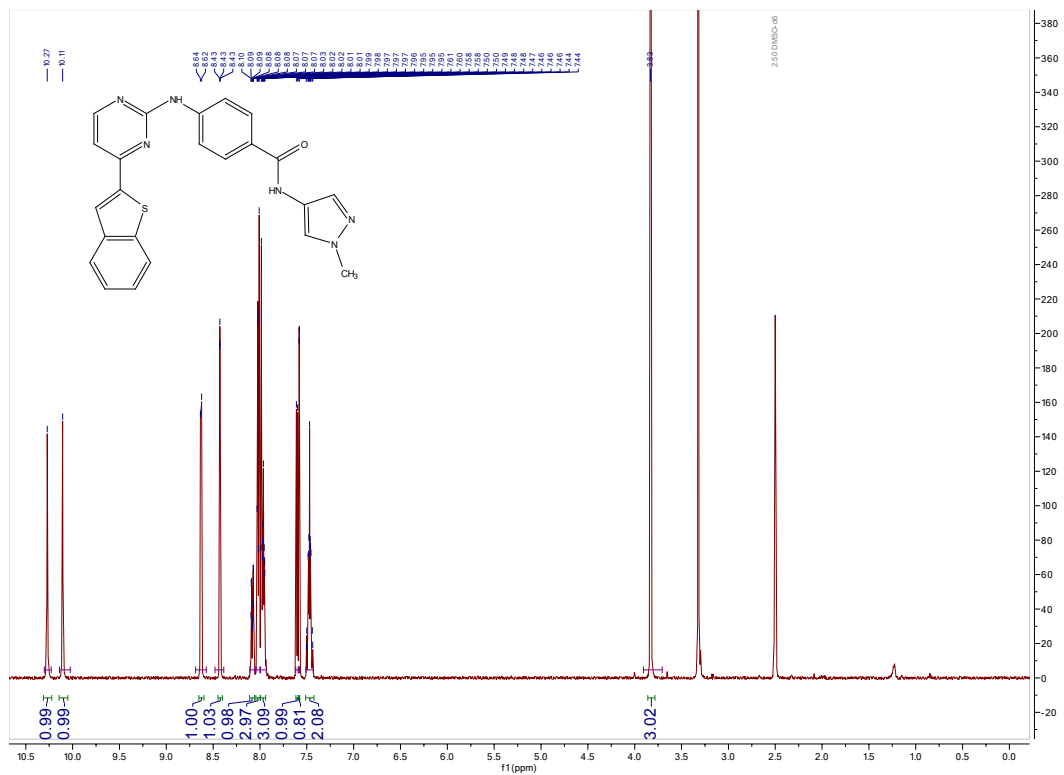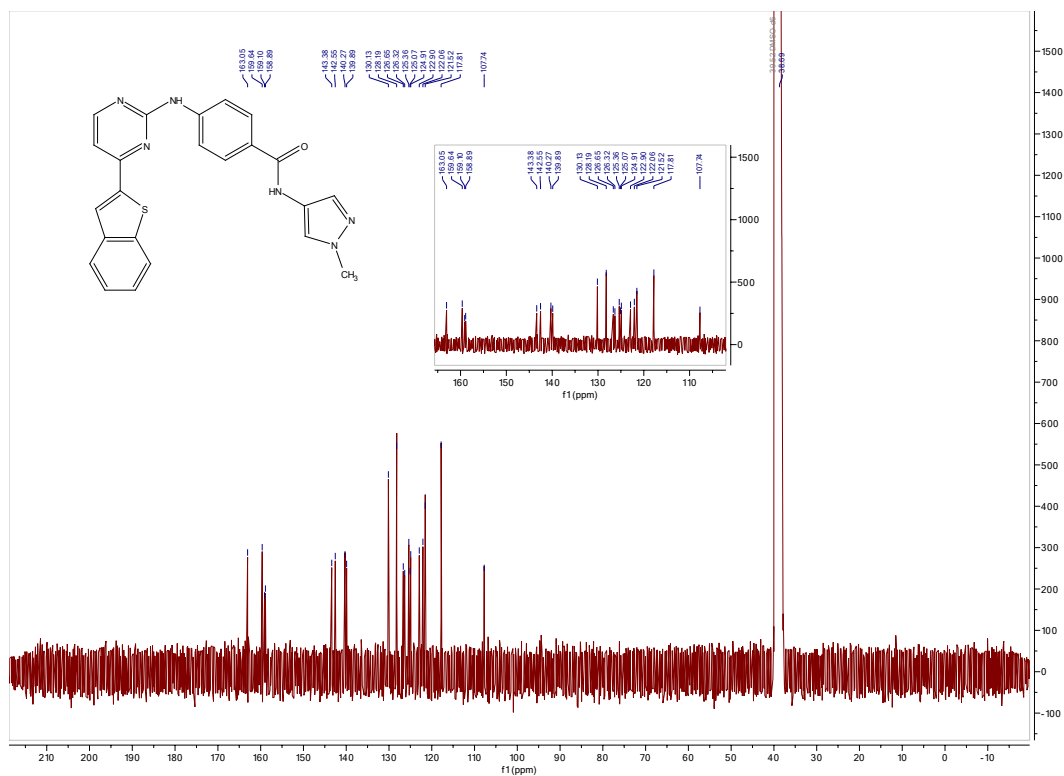

4-(Benzo[b]thiophen-2-yl)-N-(4-((4-(pyrrolidin-1-yl)piperidin-1-yl)methyl)phenyl)pyrimidin-2-amine (12)

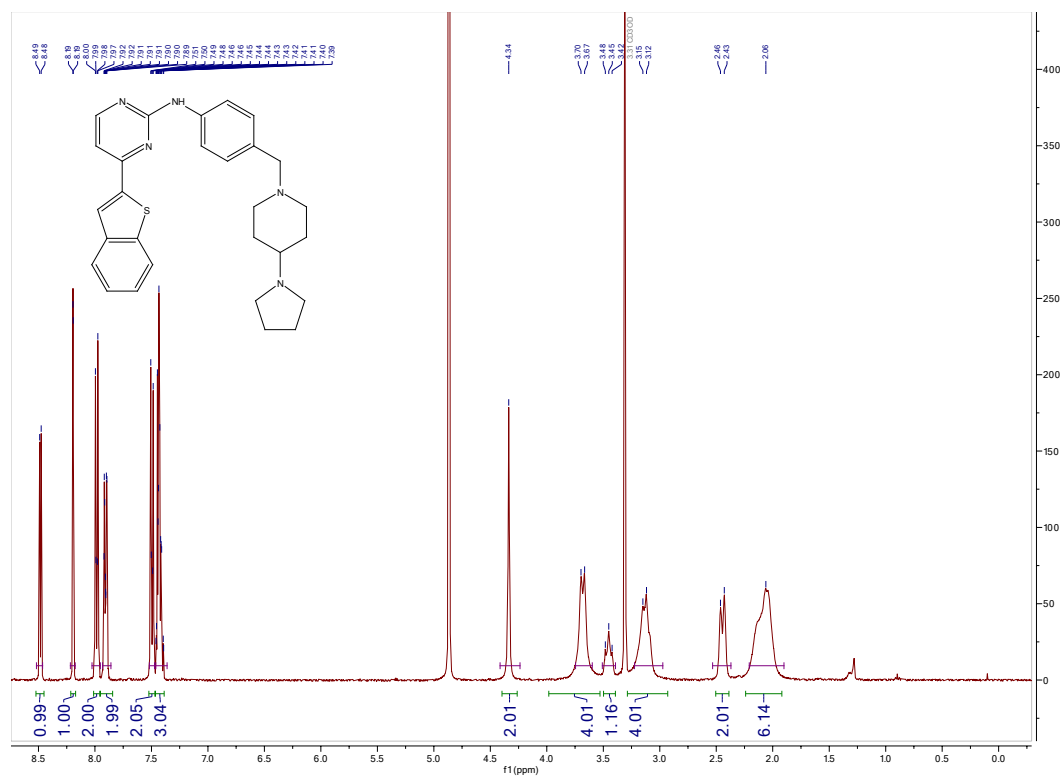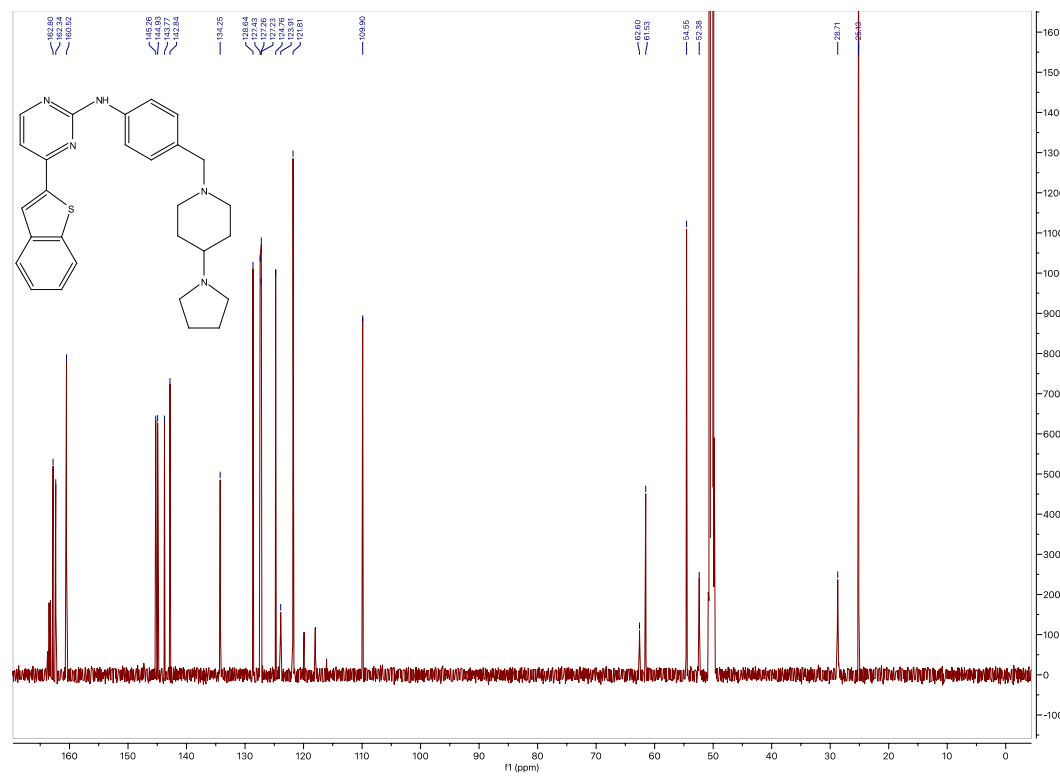

4-((4-(Benzofuran-2-yl)pyrimidin-2-yl)amino)phenyl)(4-(pyrrolidin-1-yl)piperidin-1-yl)methanone (18a)

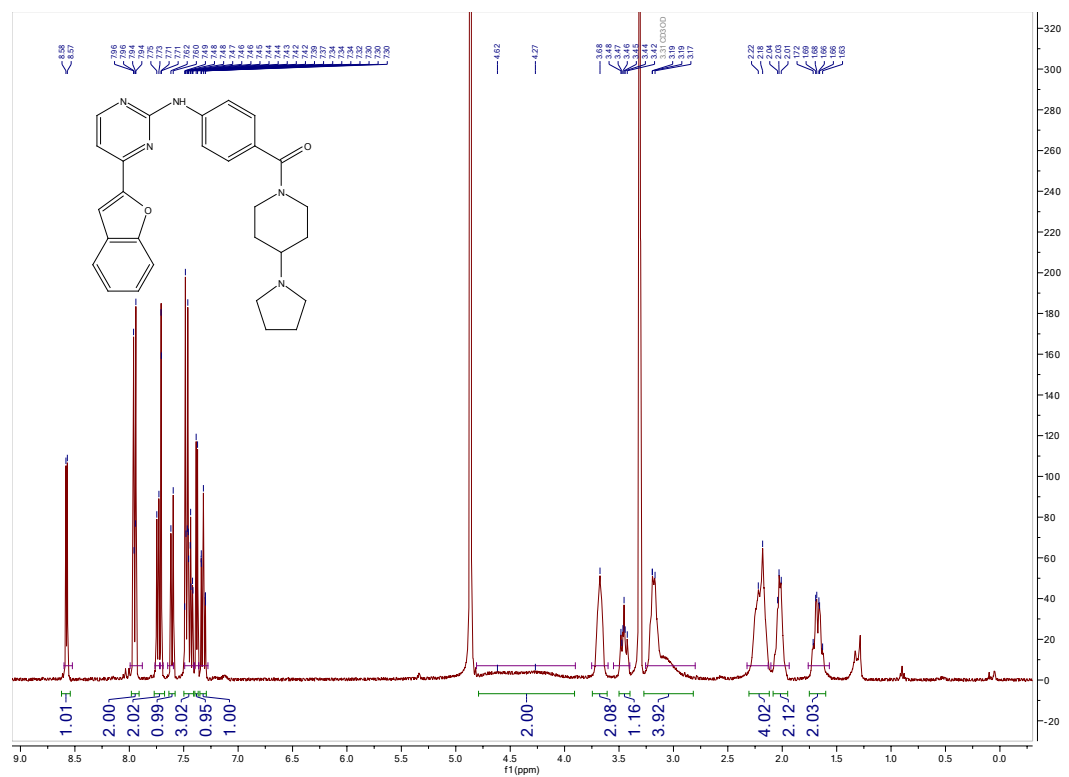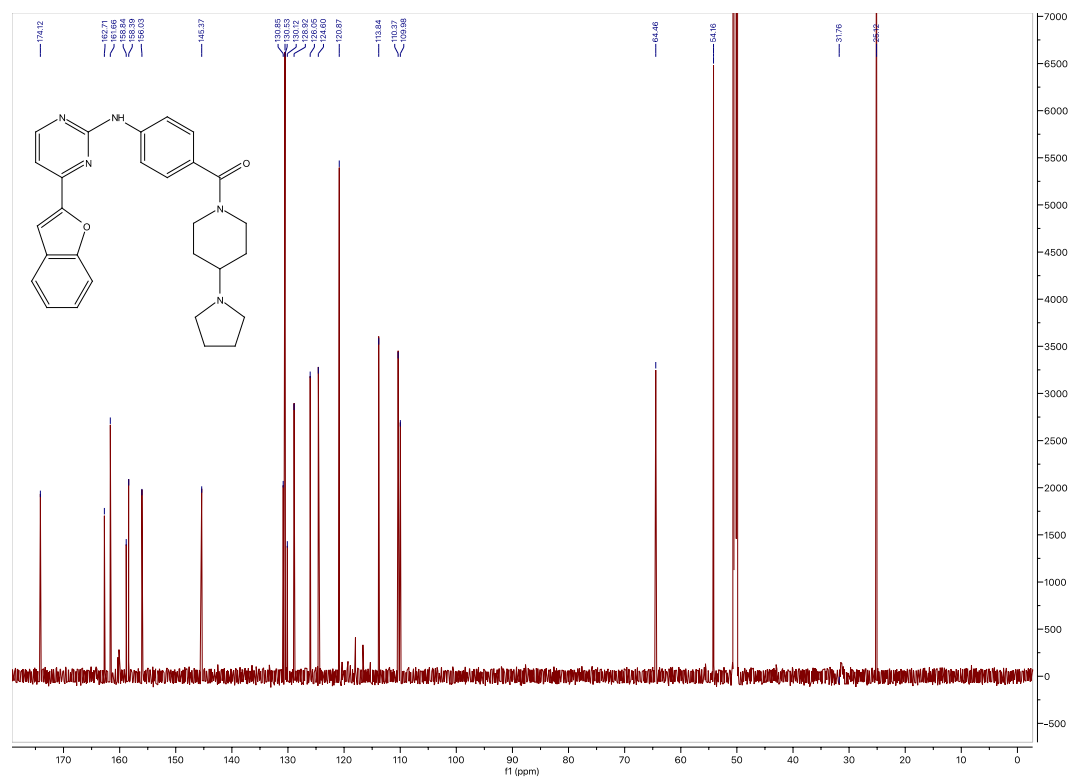



(4-(Pyrrolidin-1-yl)piperidin-1-yl)(4-((4-(thiophen-2-yl)pyrimidin-2-yl)amino)phenyl)methanone (18c)

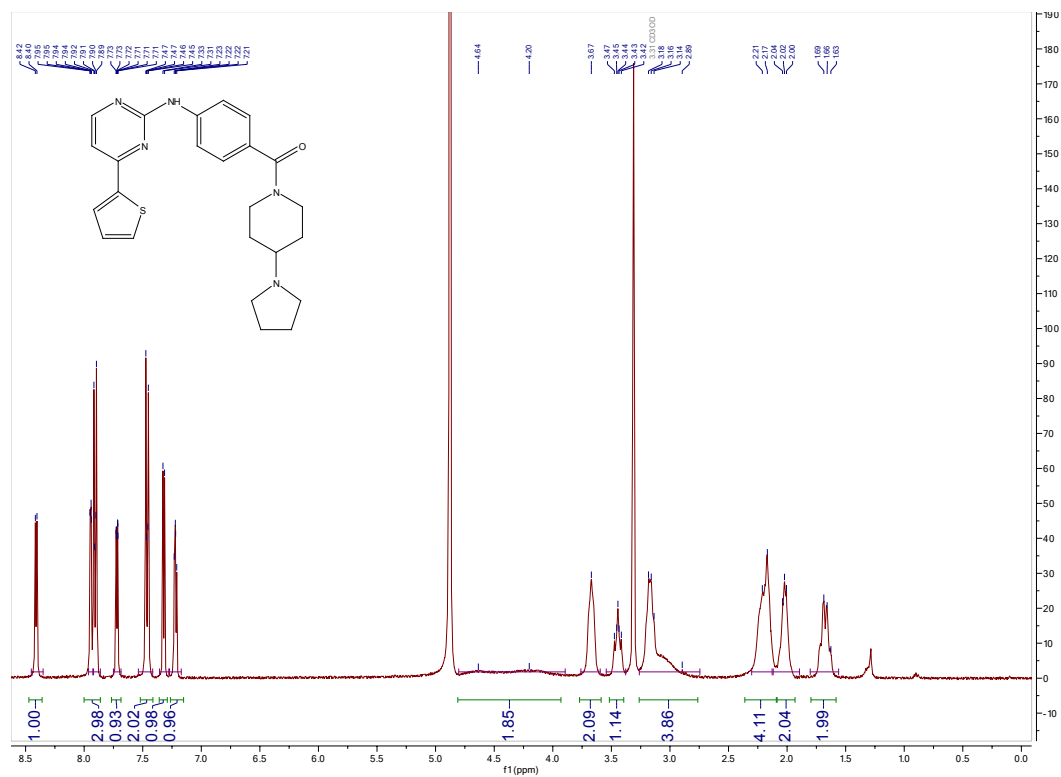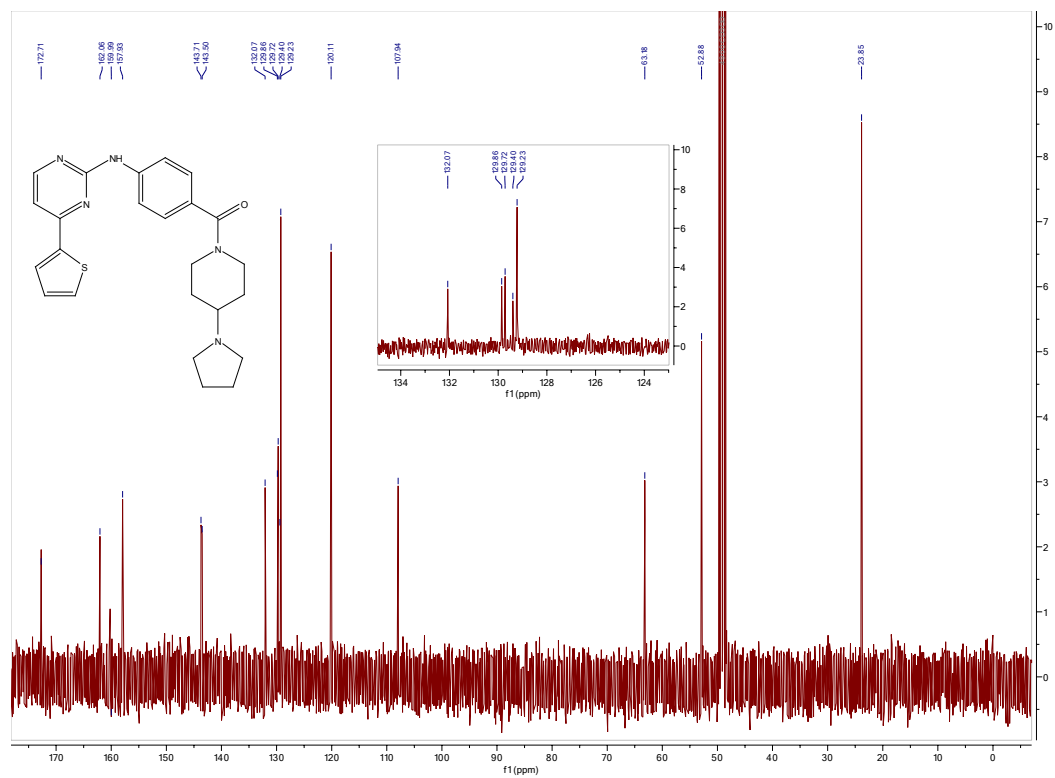





(4-((4-(Furan-2-yl)pyrimidin-2-yl)amino)phenyl)(4-(pyrrolidin-1-yl)piperidin-1-yl)methanone (18e)

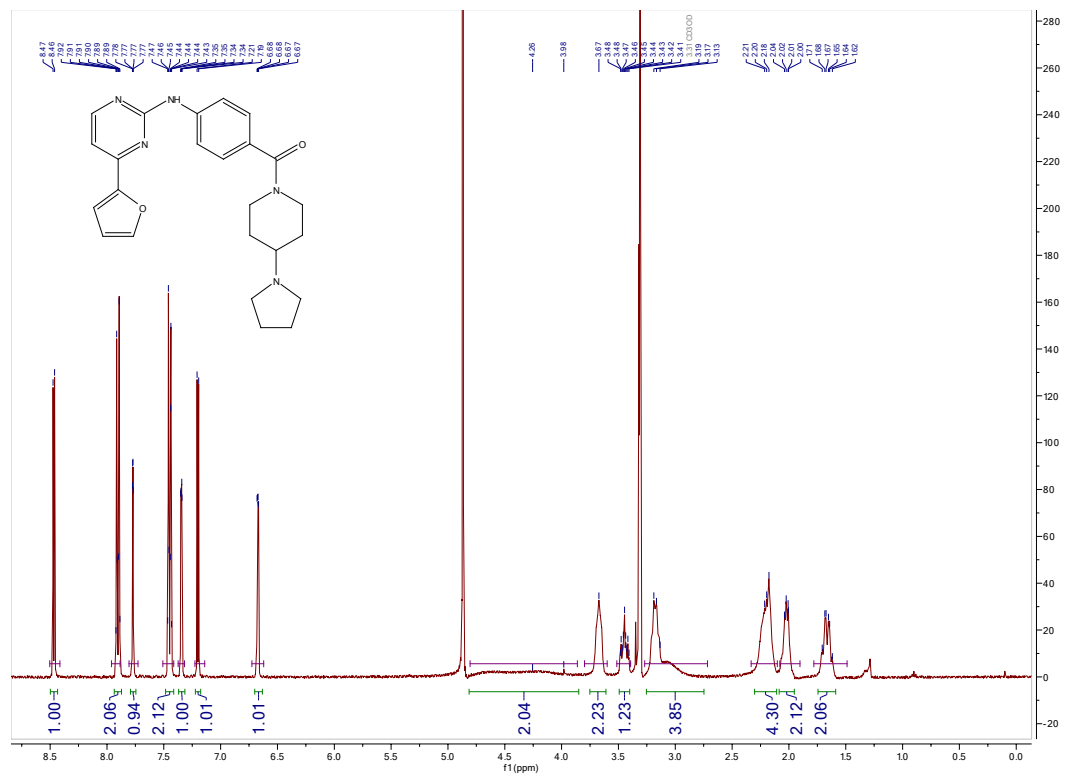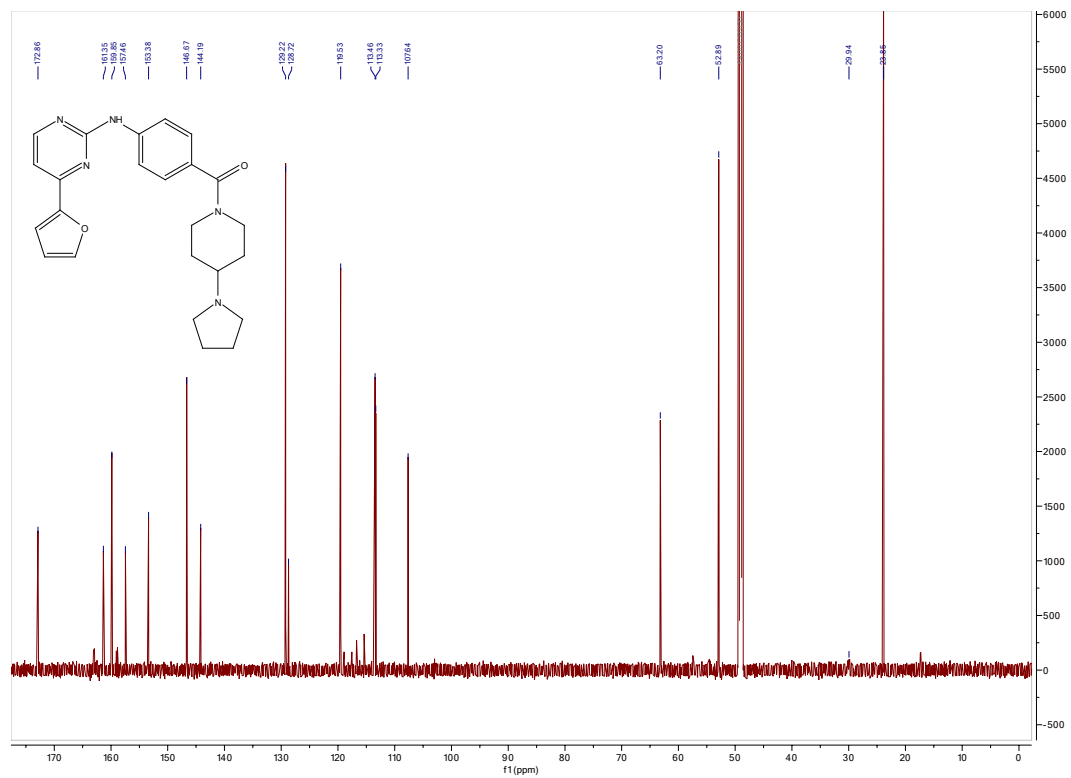

**(4-((4-(1-Methyl-1H-pyrazol-4-yl)pyrimidin-2-yl)amino)phenyl)(4-(pyrrolidin-1-yl)piperidin-1-yl)methanone (18f)**

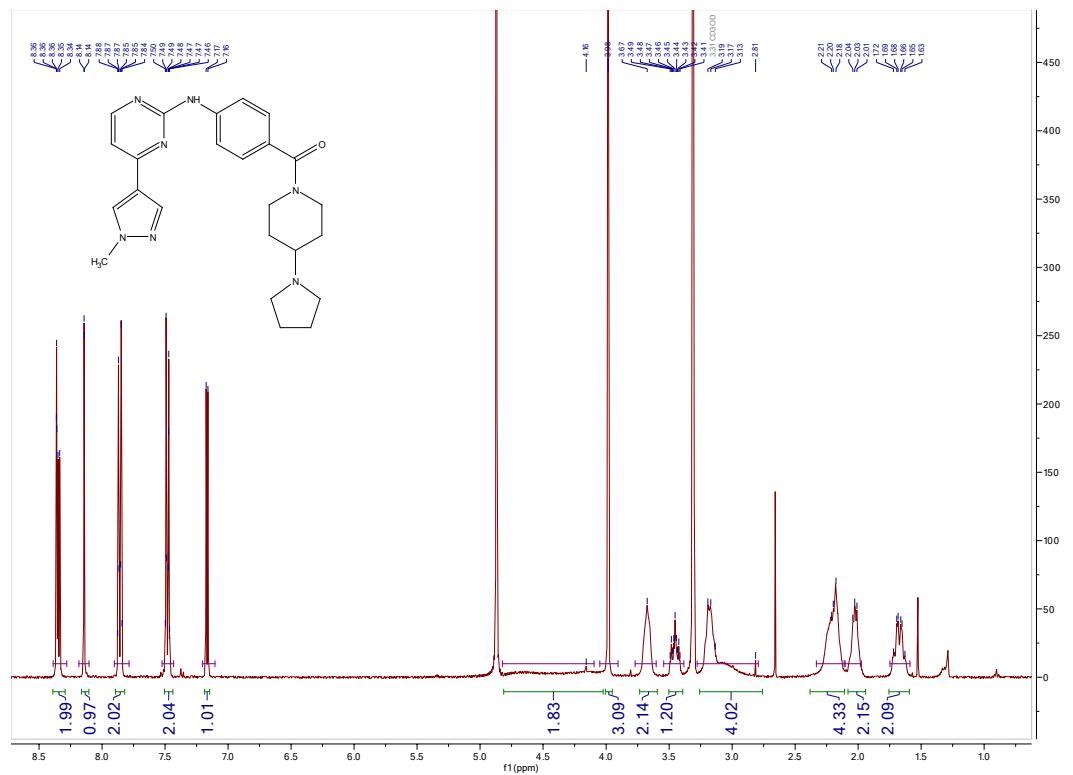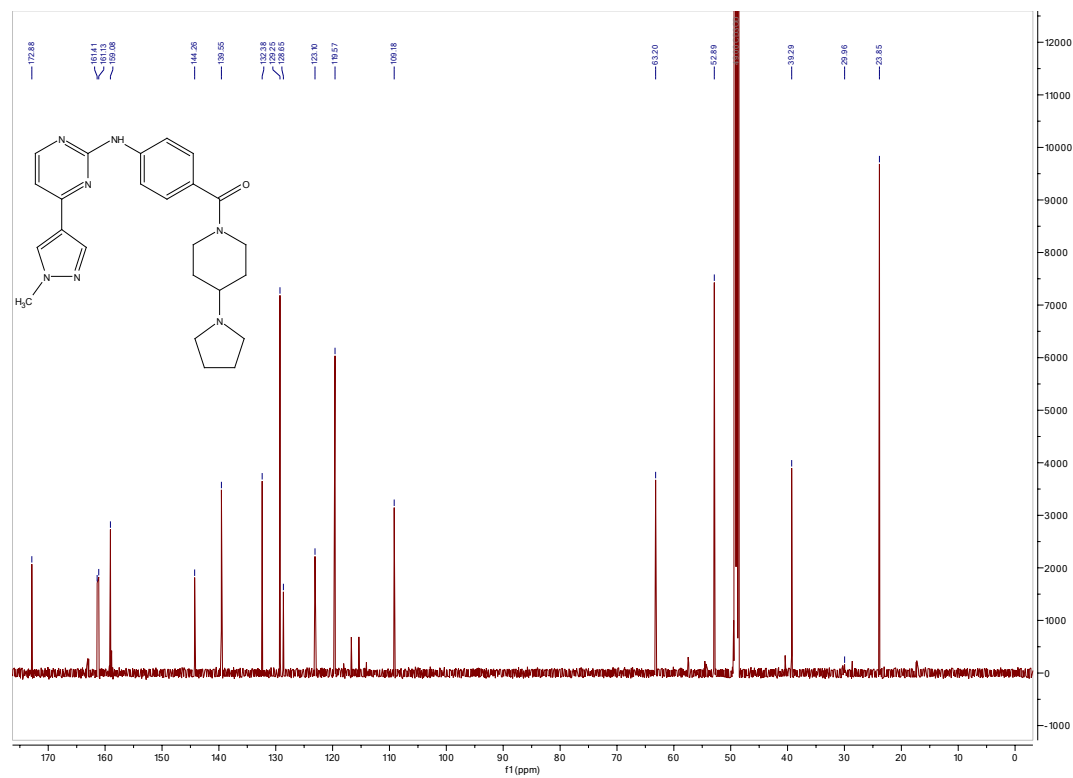





**(4-((4-(5-Methylthiophen-2-yl)pyrimidin-2-yl)amino)phenyl)(4-(3-pyrrolidin-1-yl)piperidin-1-yl)methanone (18i)**

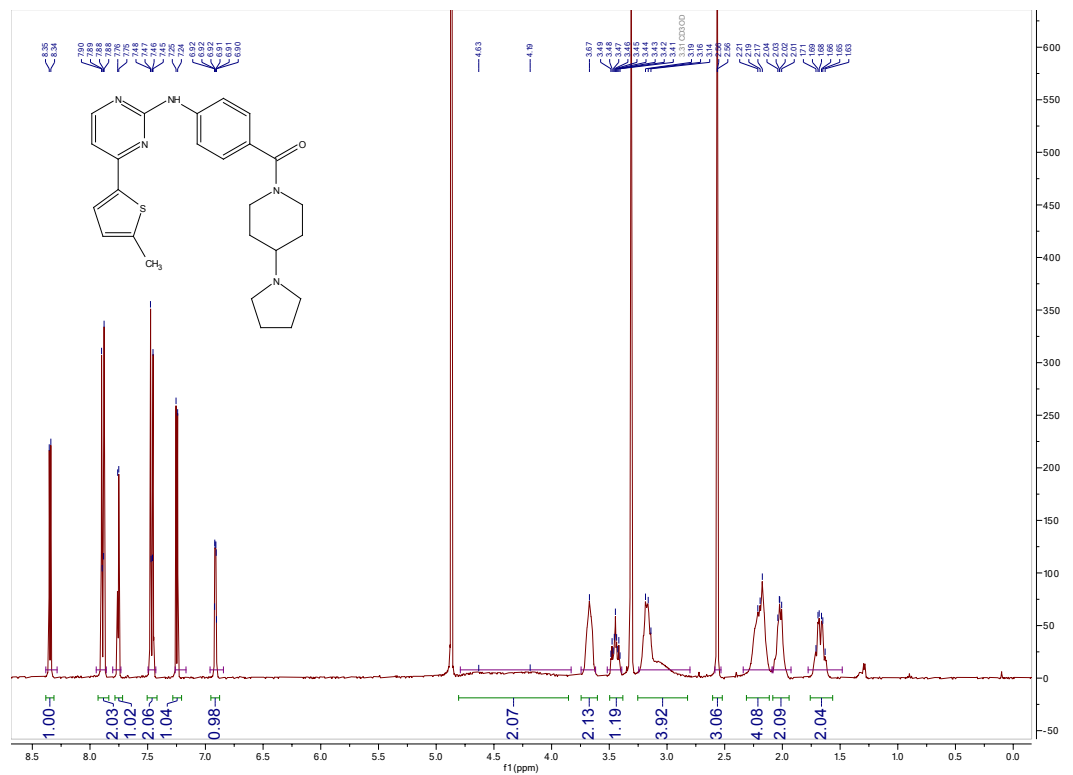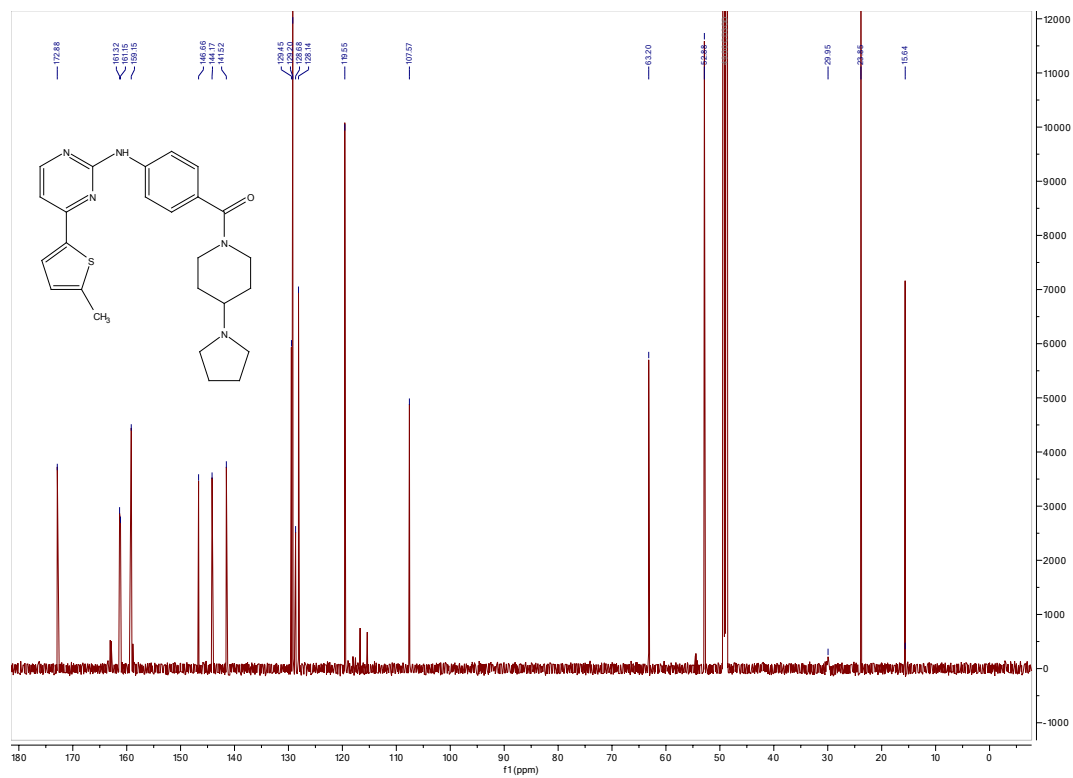

*4-((4-(5-Chlorothiophen-2-yl)pyrimidin-2-yl)amino)phenyl)(4-(pyrrolidin-1-yl)piperidin-1-yl)methanone (18j)*

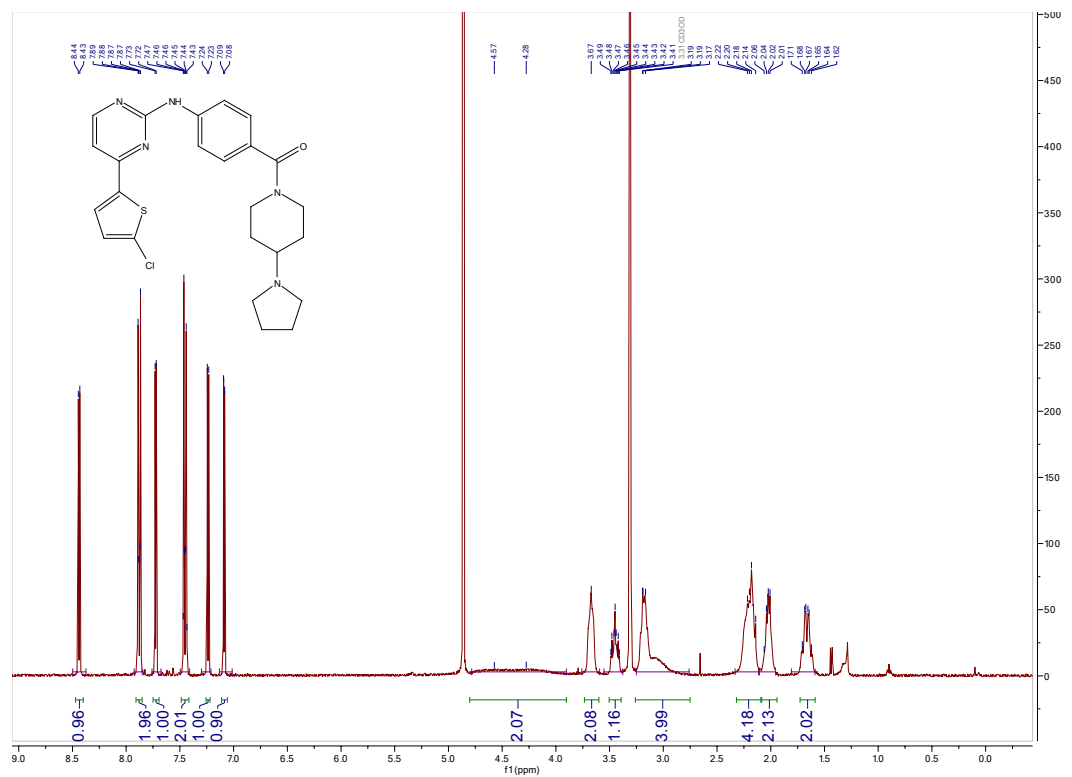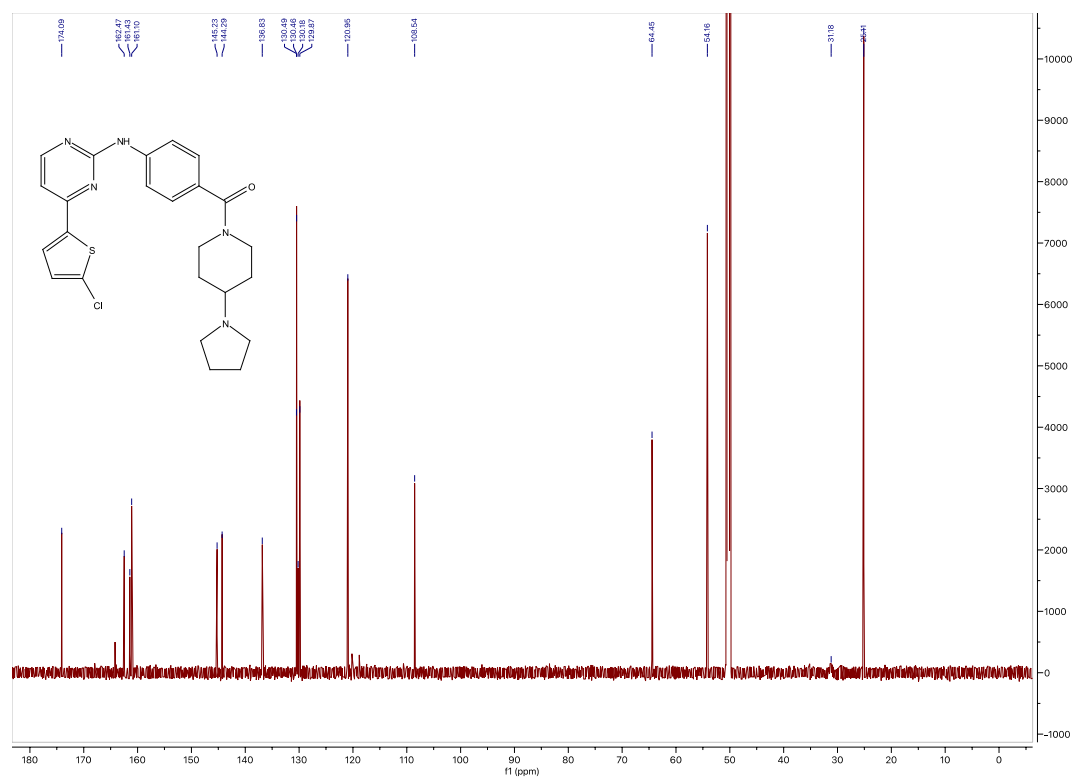

**(4-((4-(5-Phenylthiophen-2-yl)pyrimidin-2-yl)amino)phenyl)(4-(pyrrolidin-1-yl)piperidin-1-yl)methanone (18k)**

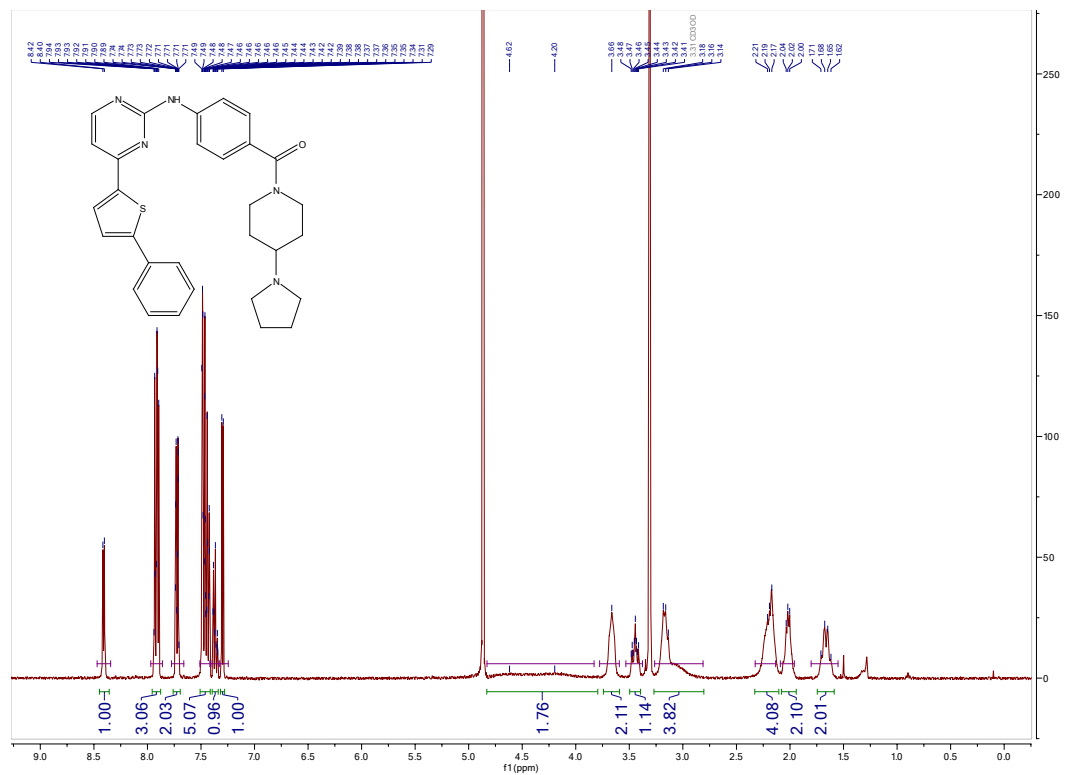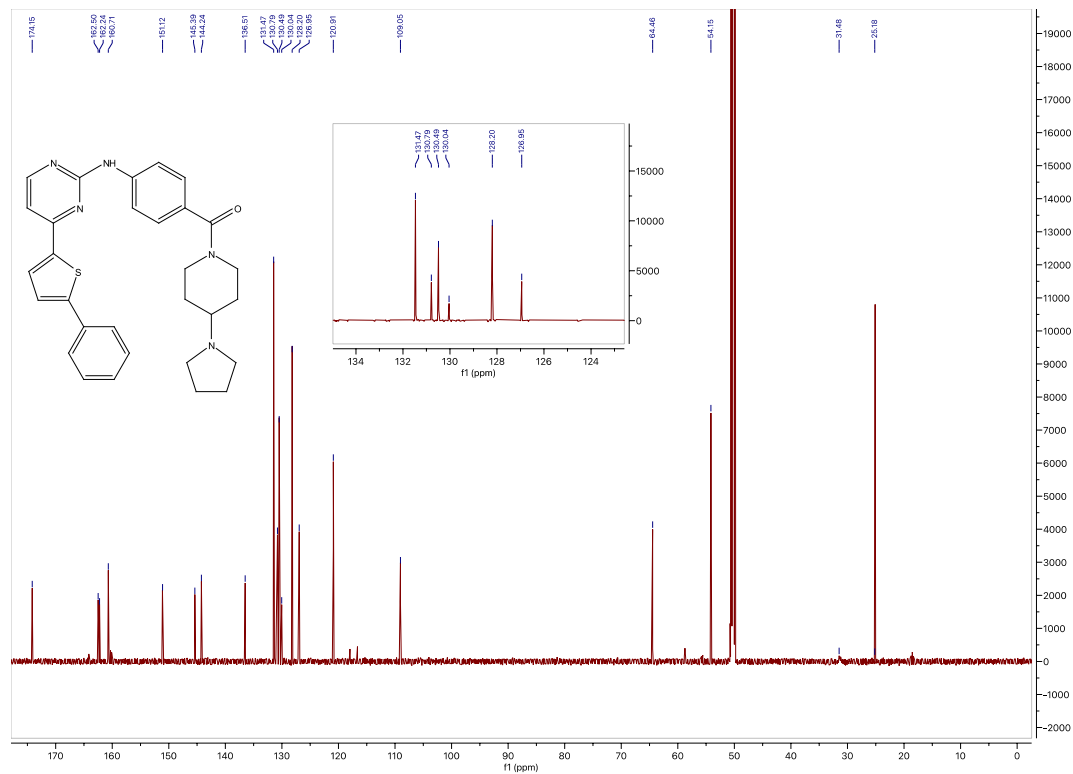

**(4-((4-(5-(Hydroxymethyl)thiophen-2-yl)pyrimidin-2-yl)amino)phenyl)(4-(pyrrolidin-1-yl)piperidin-1-yl)methanone (18)**

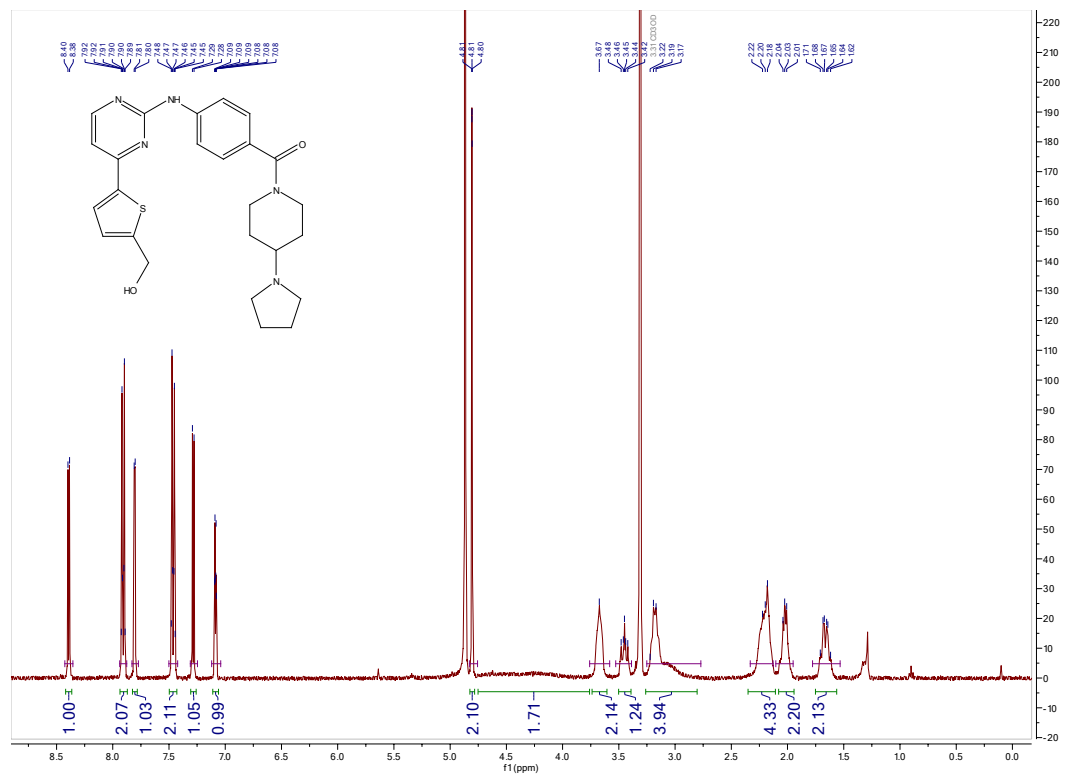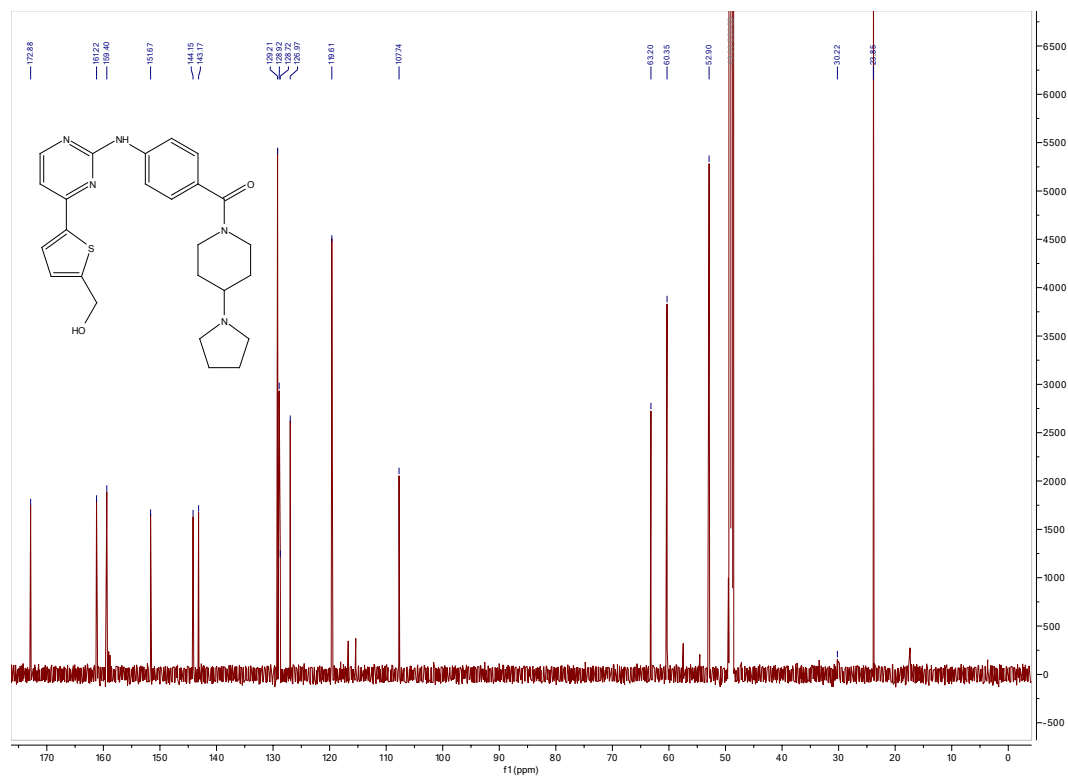



(4-(Pyrrolidin-1-yl)piperidin-1-yl)(4-((4-(5-((2,2,2-trifluoroethoxy)methyl)thiophen-2-yl)pyrimidin-2-yl)amino)phenyl)methanone (18m)

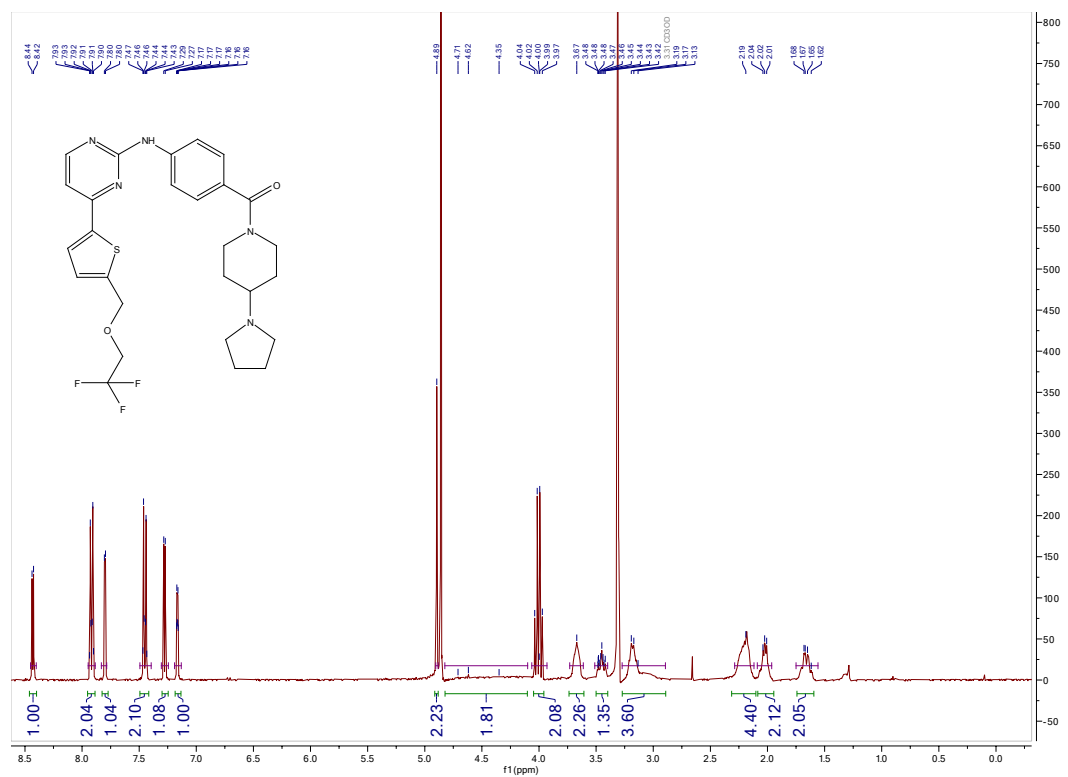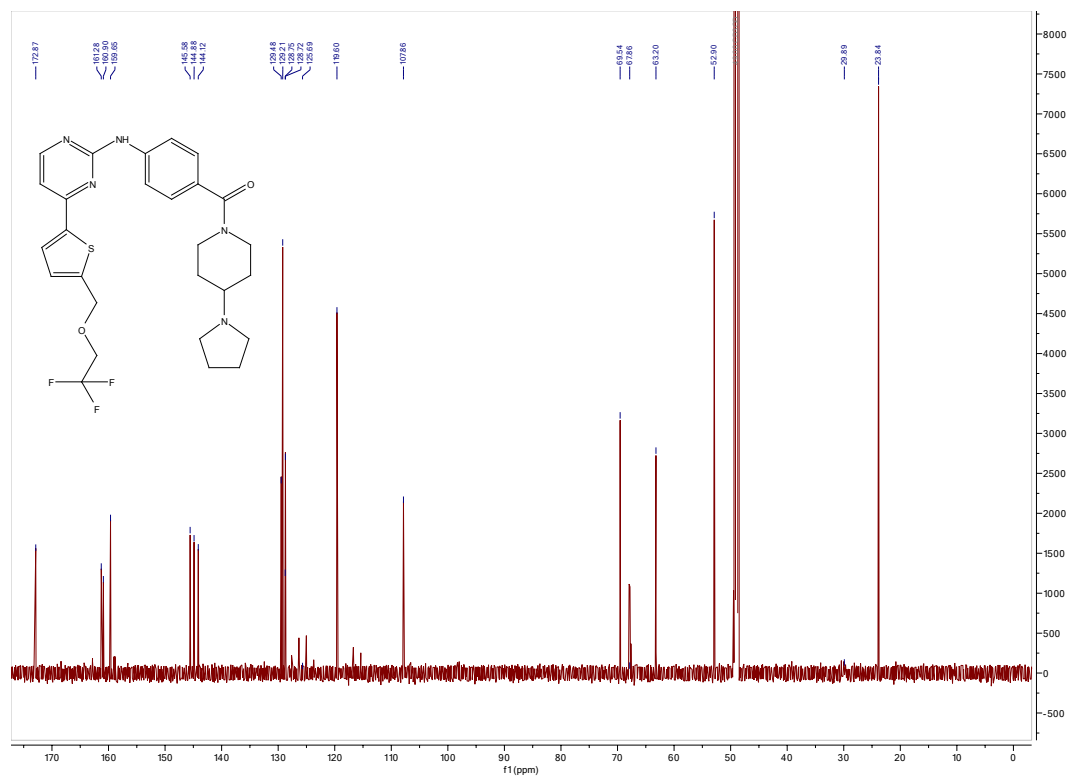

**4-((4-(Benzo[b]thiophen-2-yl)-5-methylpyrimidin-2-yl)amino)phenyl)(4-(pyrrolidin-1-yl)piperidin-1-yl)methanone (18n)**

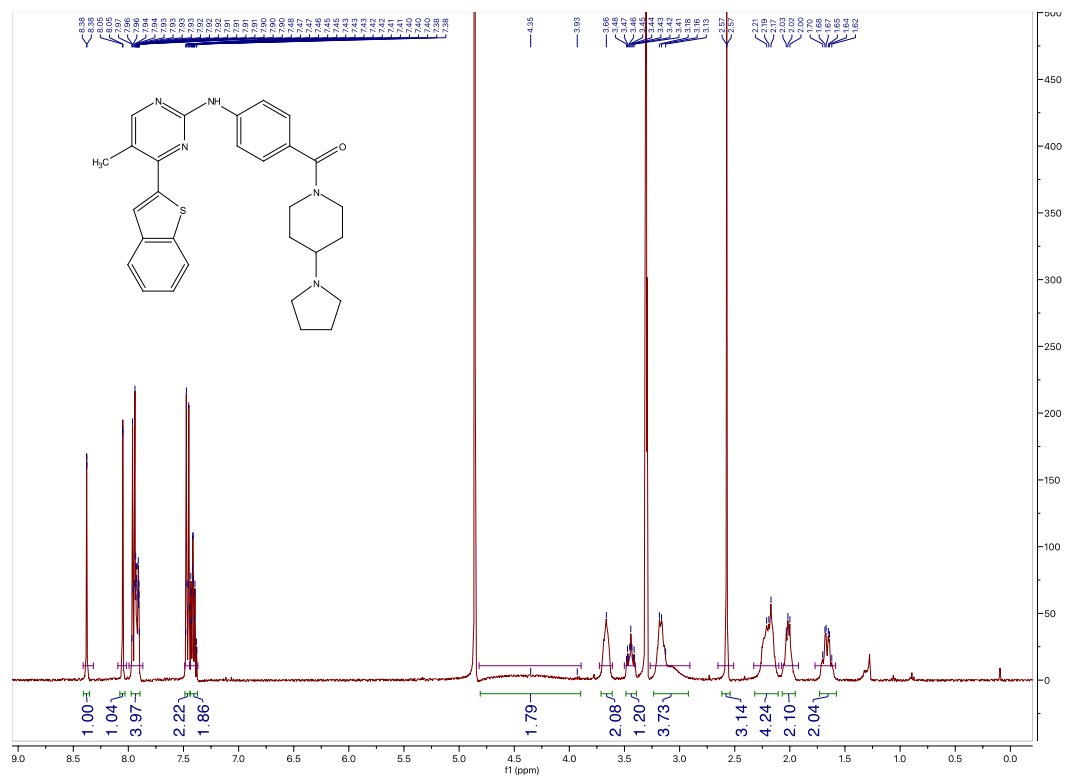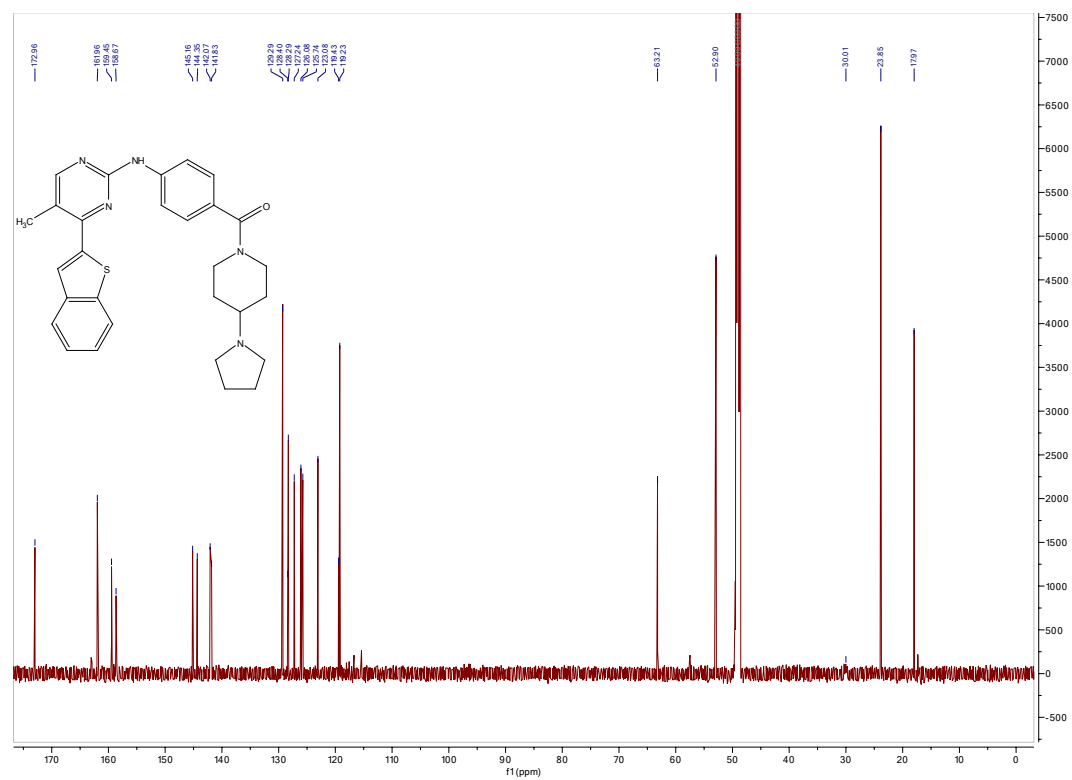

**4-((4-(Benzo[b]thiophen-2-yl)-5-cyclopropylpyrimidin-2-yl)amino)phenyl)(4-(pyrrolidin-1-yl)piperidin-1-yl)methanone (18o)**

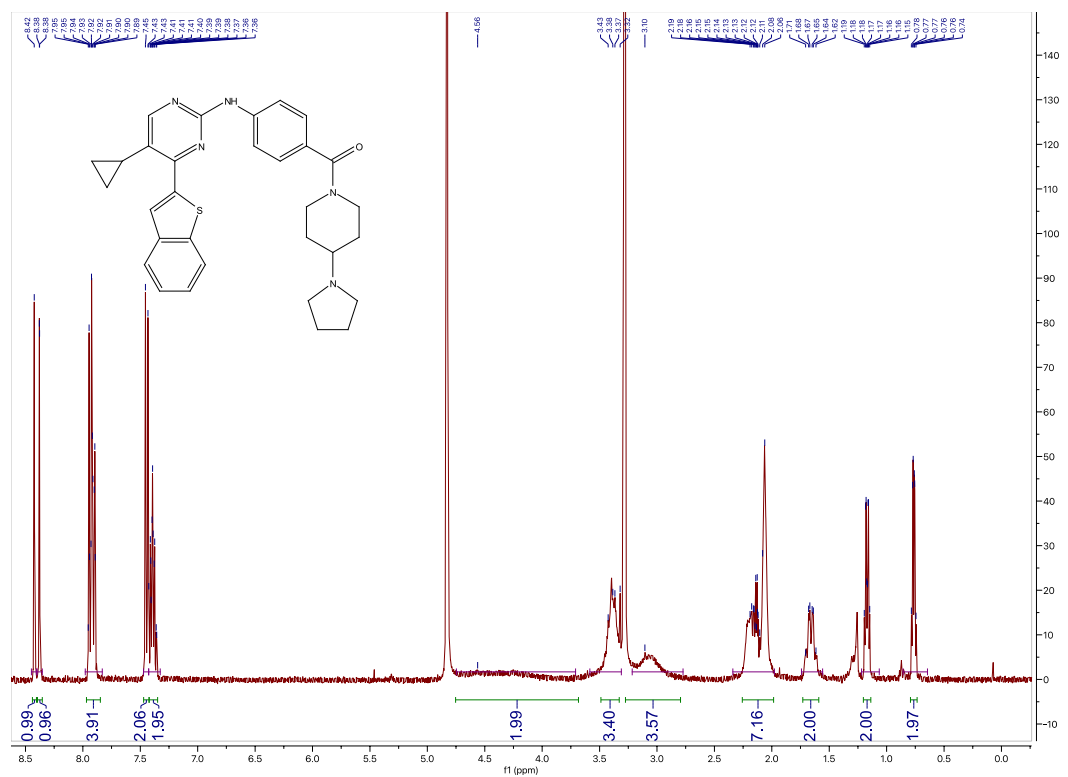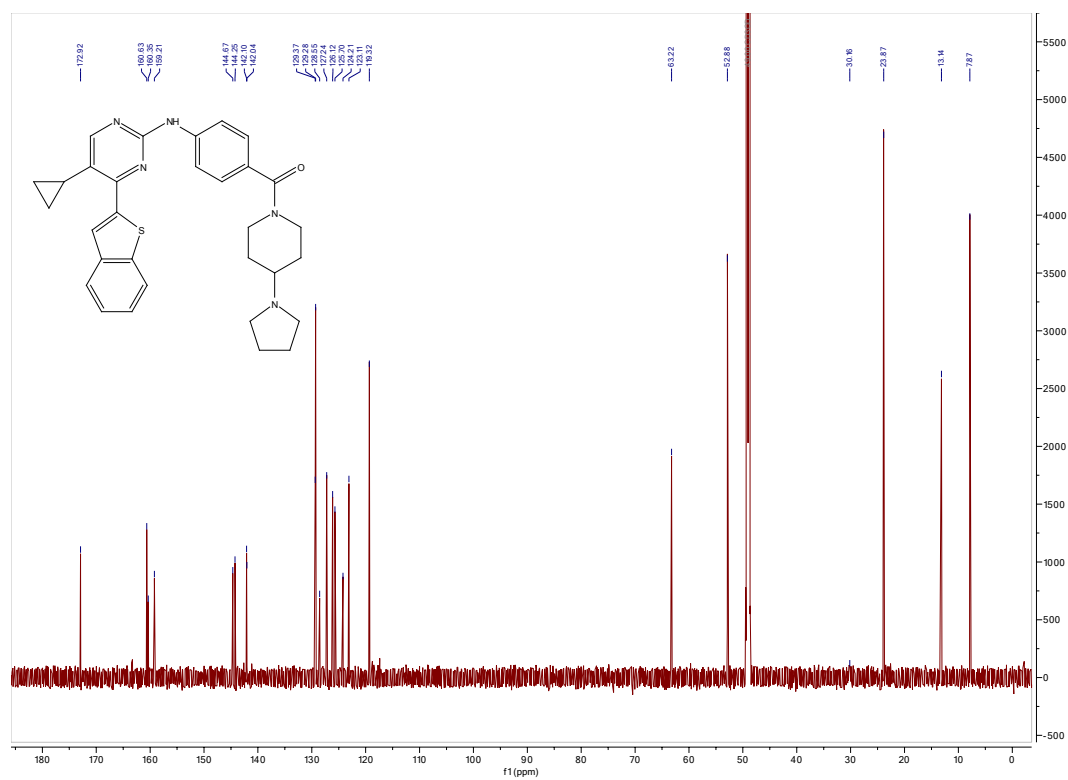

**4-((4-(Benzo[b]thiophen-2-yl)-5-methoxypyrimidin-2-yl)amino)phenyl)(4-(pyrrolidin-1-yl)piperidin-1-yl)methanone (18p)**

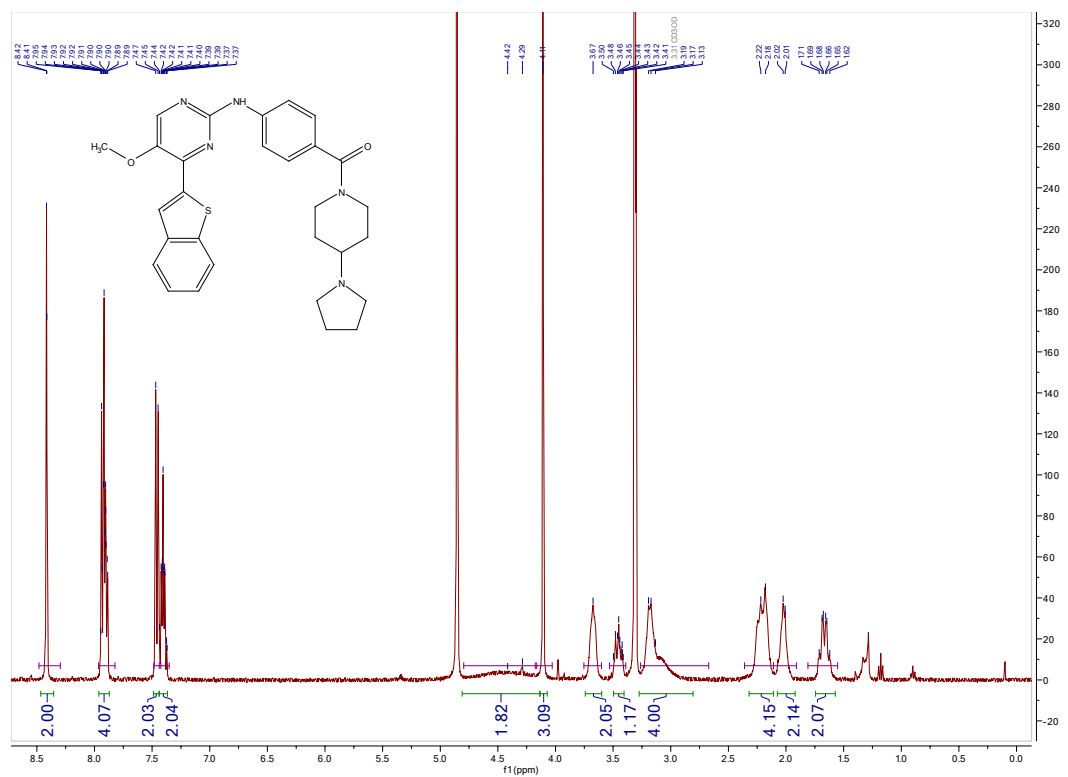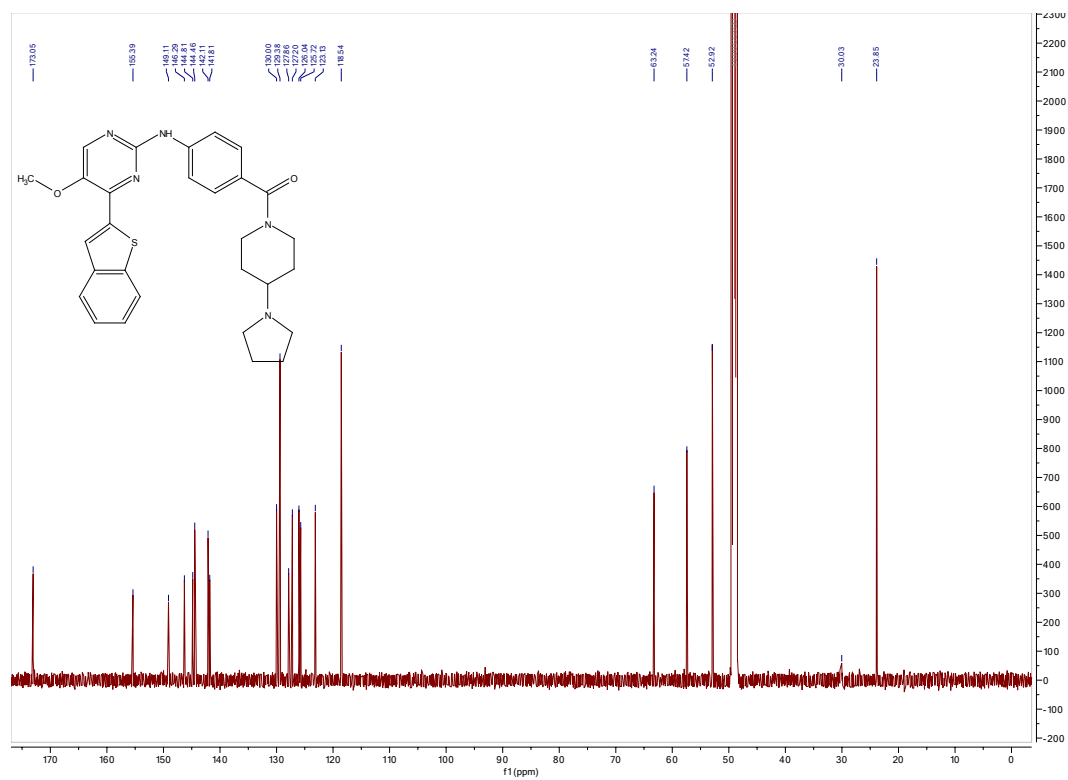





**4-((4-(Benzo[b]thiophen-2-yl)-5-bromopyrimidin-2-yl)amino)phenyl)(4-(pyrrolidin-1-yl)piperidin-1-yl)methanone (18s)**

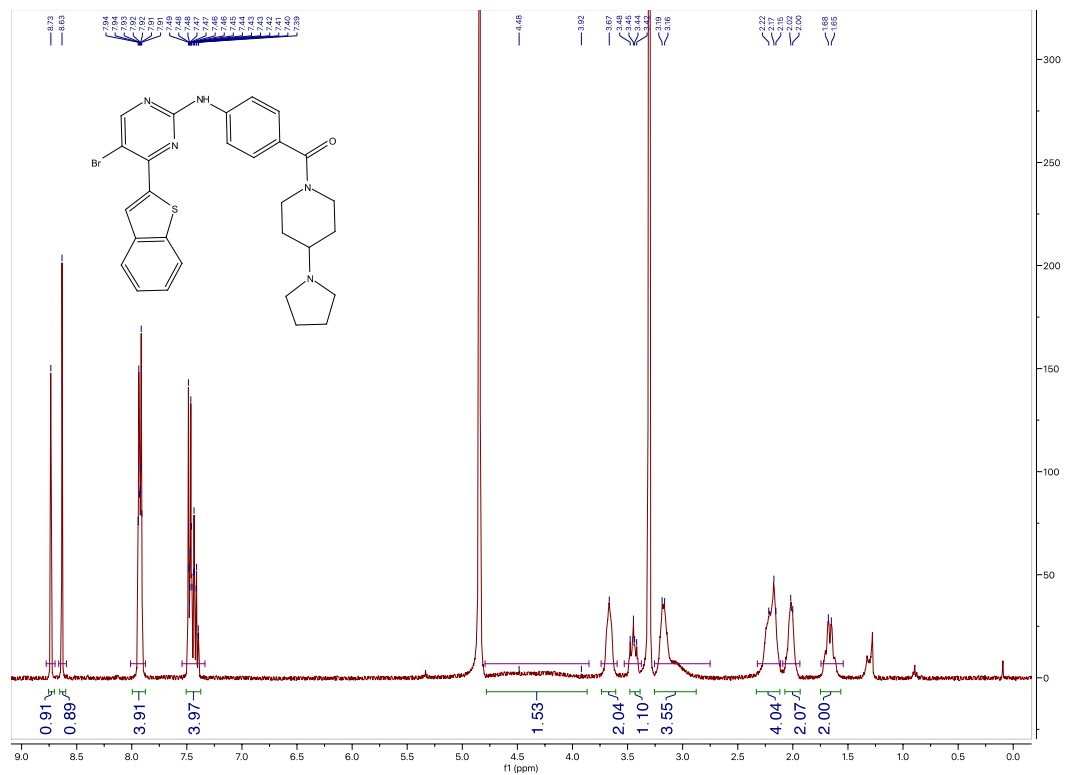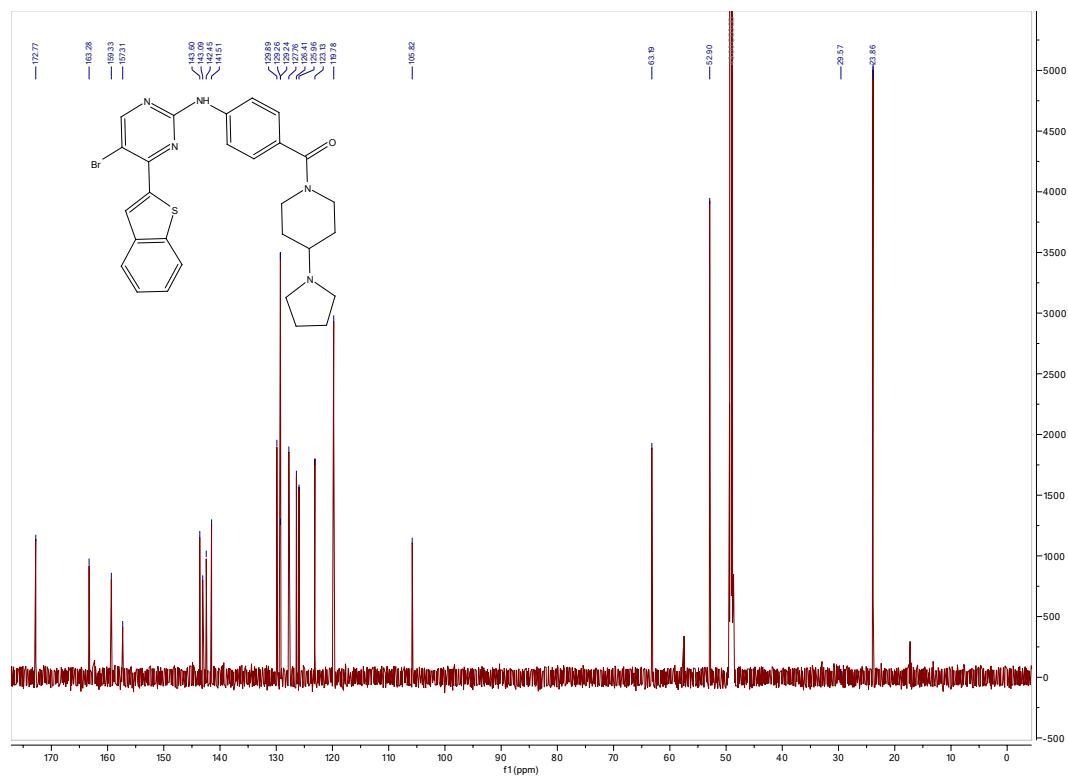









**(4-((4-(5-Chlorothiophen-2-yl)-5-methylpyrimidin-2-yl)amino)phenyl)(4-(pyrrolidin-1-yl)piperidin-1-yl)methanone (23c)**

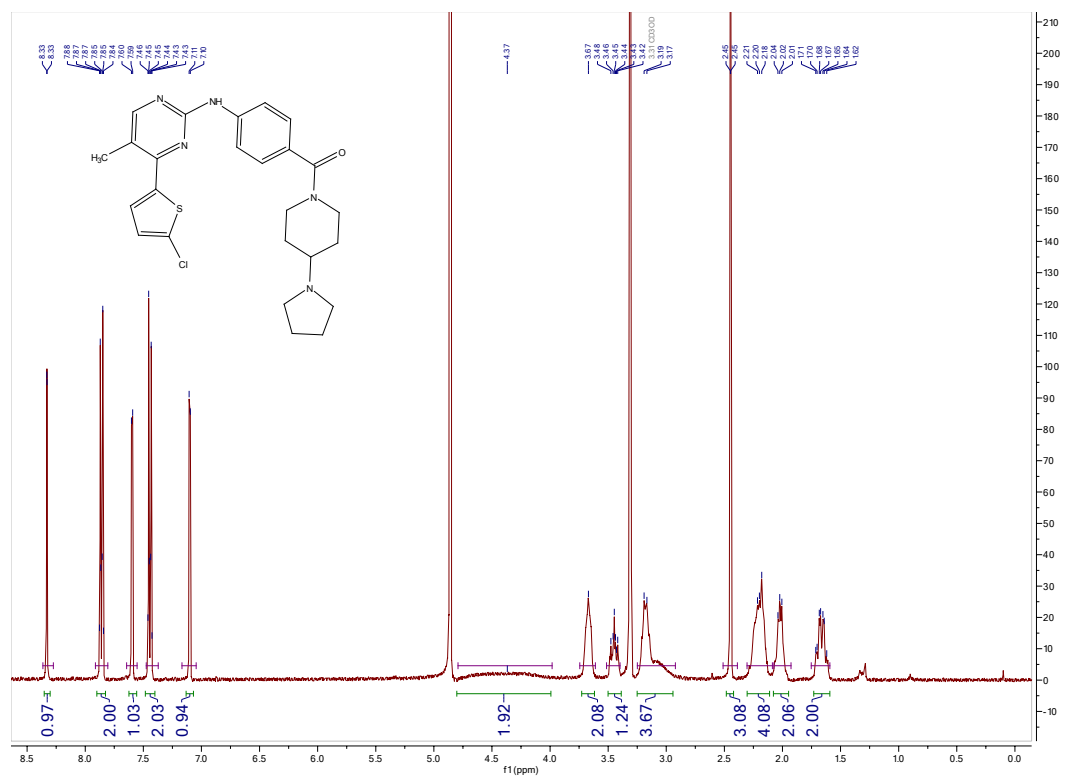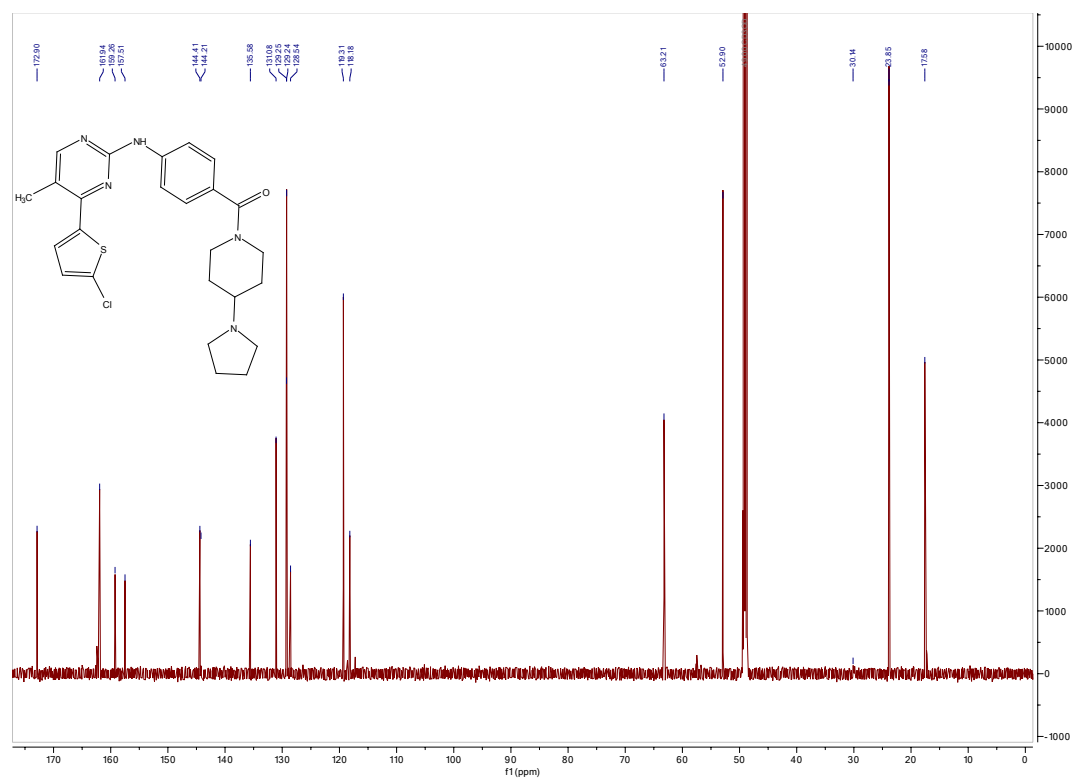

**4-((5-Chloro-4-(5-chlorothiophen-2-yl)pyrimidin-2-yl)amino)phenyl)(4-(pyrrolidin-1-yl)piperidin-1-yl)methanone (23d)**

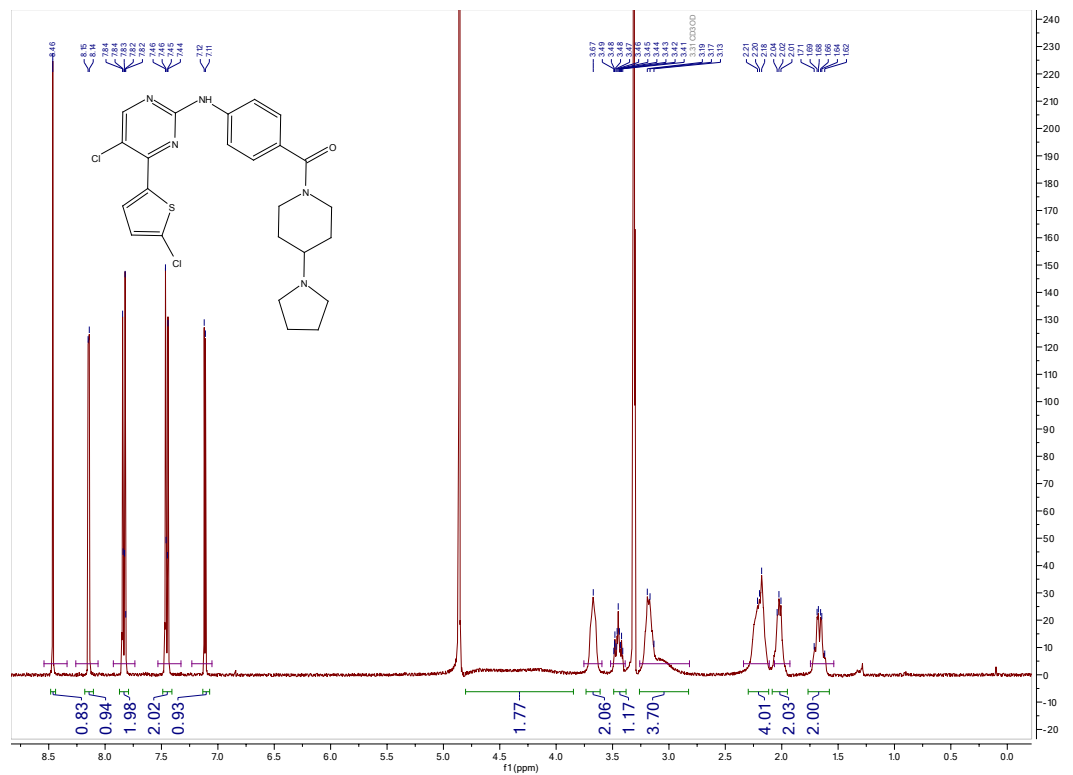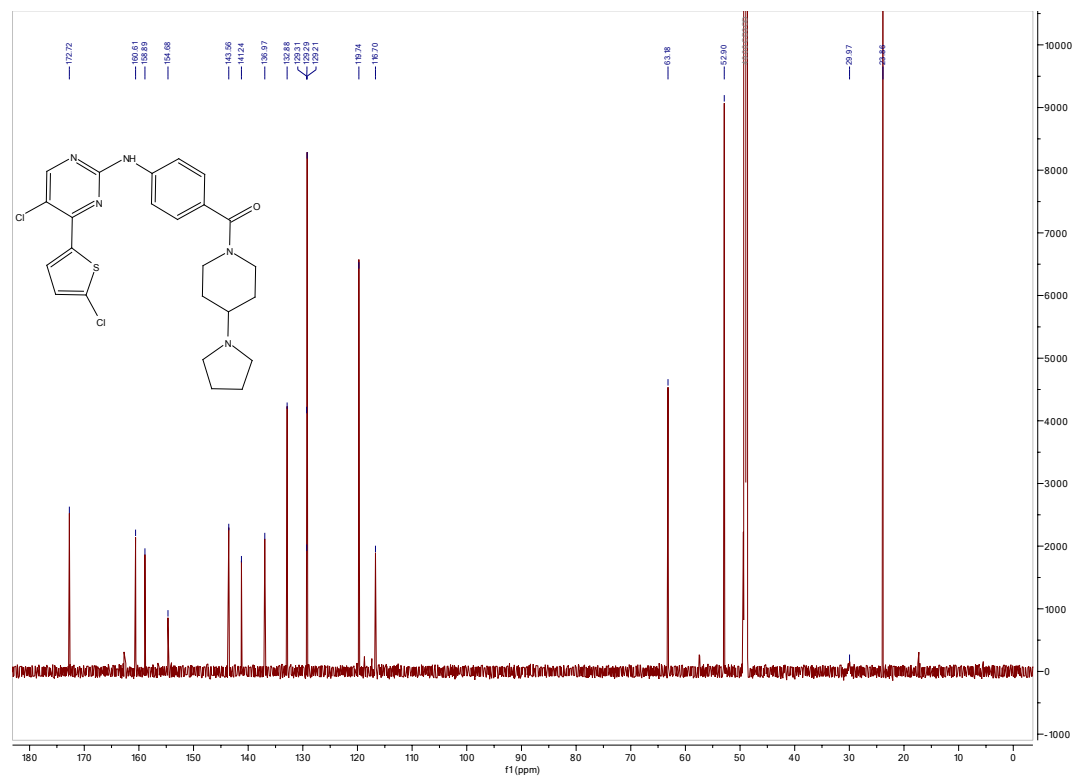

4-((5-Chloro-4-(5-chlorothiophen-2-yl)pyrimidin-2-yl)amino)-N-(3-morpholinopropyl)benzamide (23e)

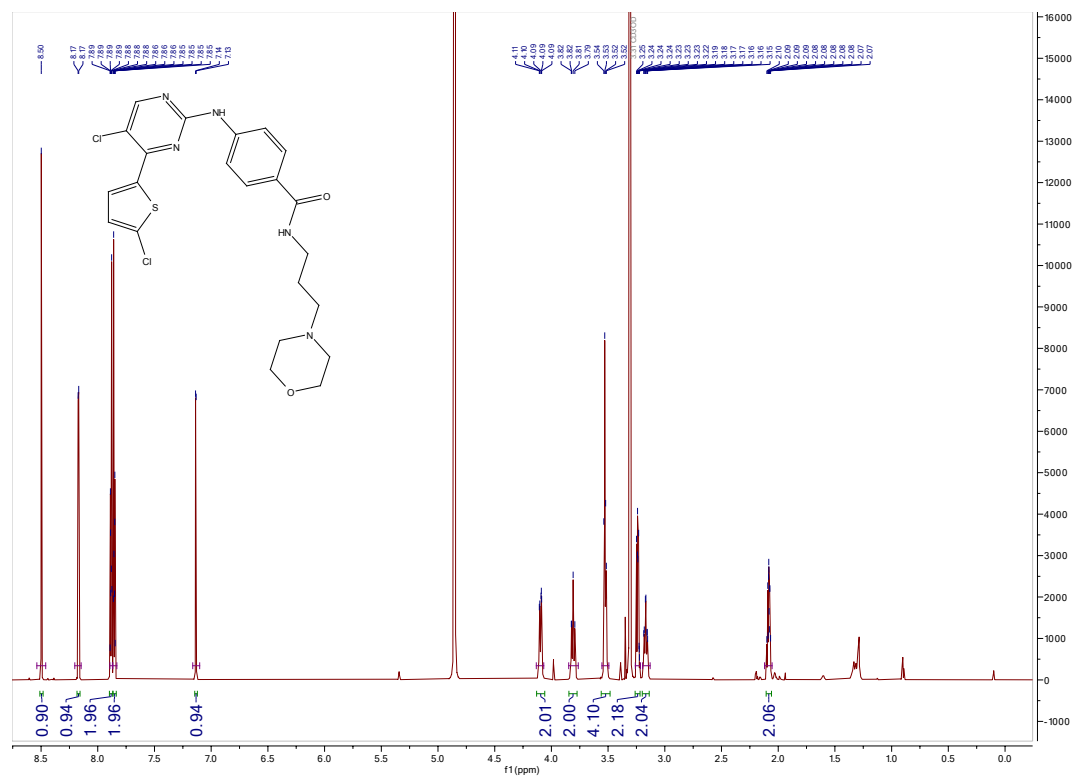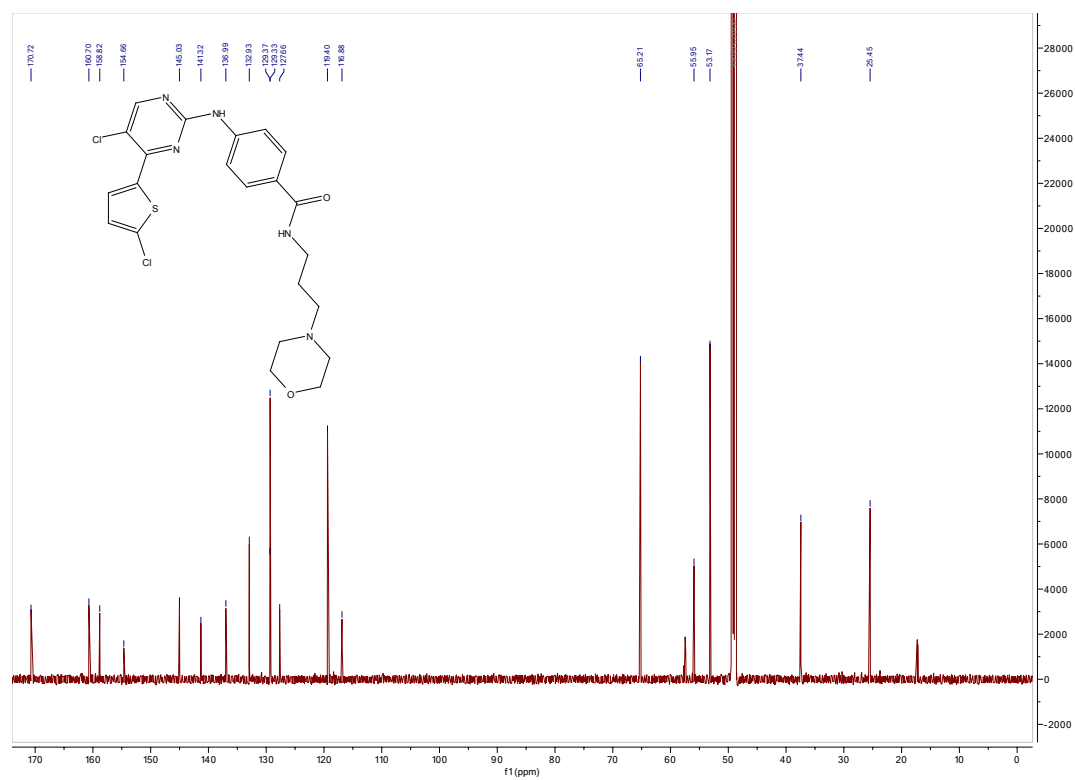

4-((5-Chloro-4-(5-methylthiophen-2-yl)pyrimidin-2-yl)amino)-N-(3-morpholinopropyl)benzamide (23f)

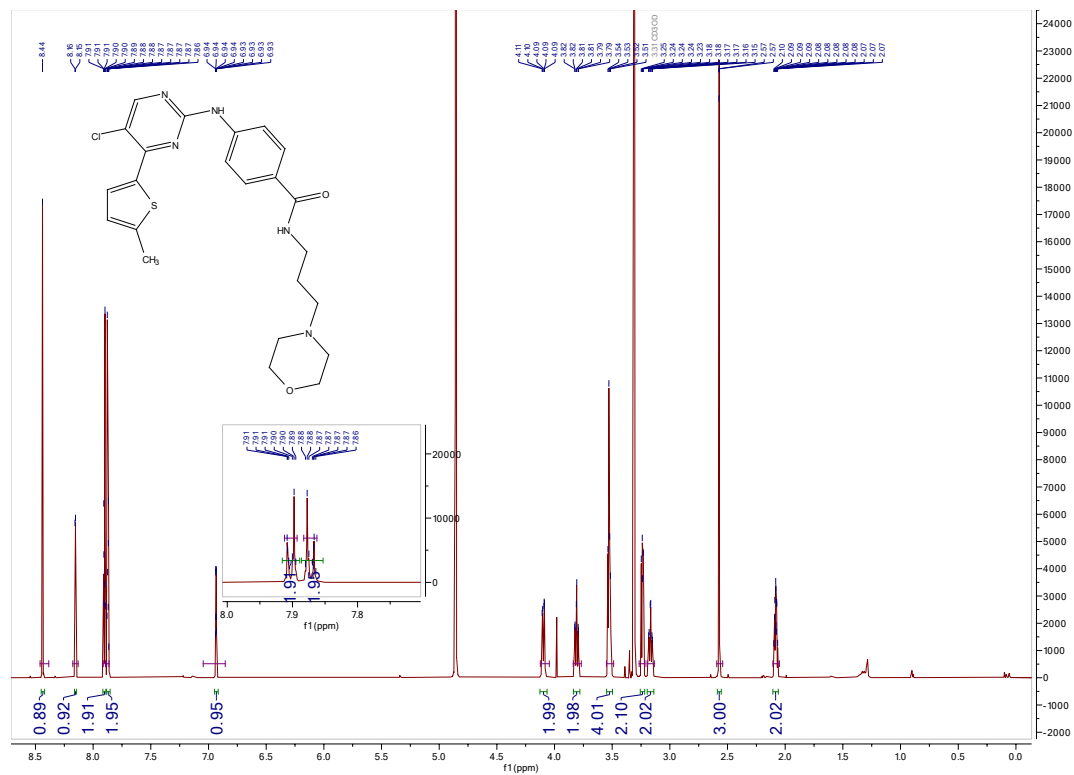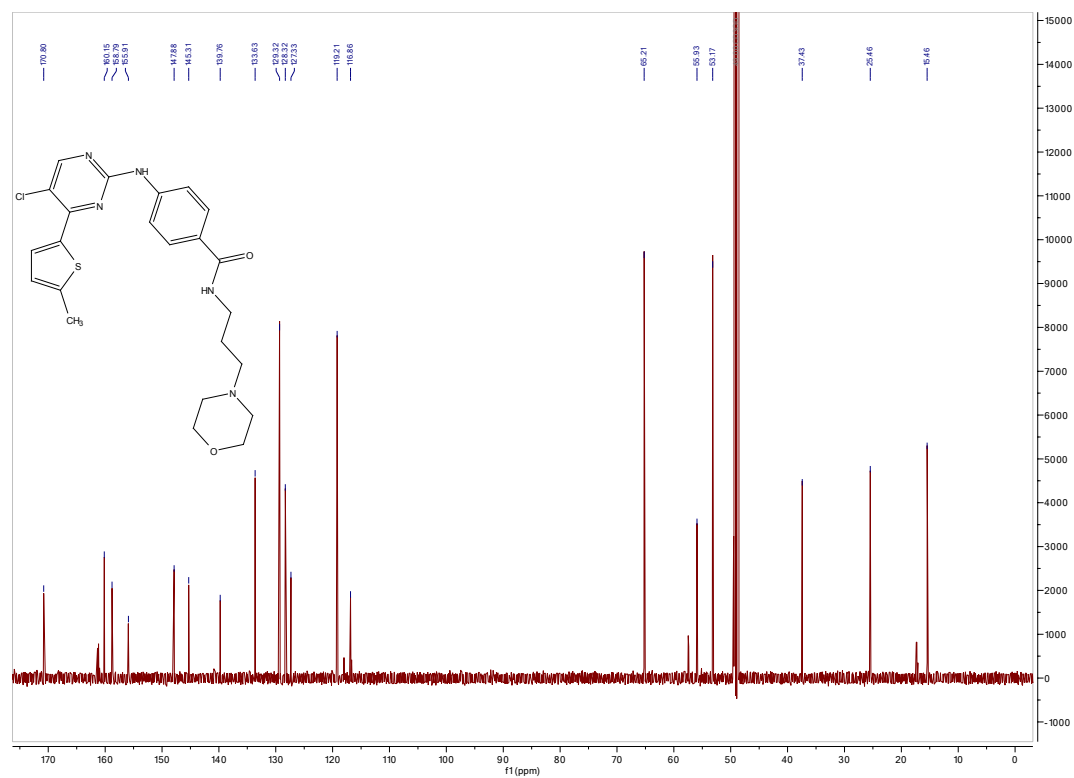



## HRMS spectra of compounds submitted for biological screening

### 4-(Benzo[b]thiophen-2-yl)-N-phenylpyrimidin-2-amine (4a)

KG-3 #1218-1302 RT: 5.26-5.63 AV: 85 NL: 1.65E9  
T: FTMS + c ESI Full ms [200.0000-2000.0000]

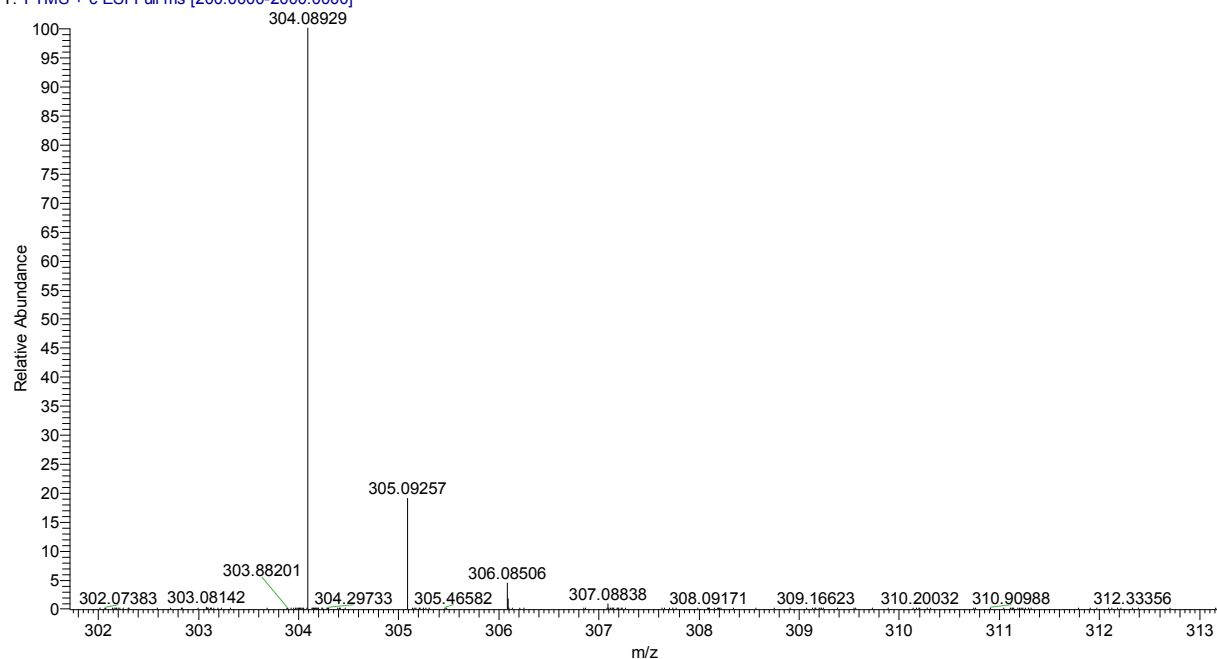

### 4-(Benzo[b]thiophen-2-yl)-N-(4-chlorophenyl)pyrimidin-2-amine (4b)

KG-09 #1313-1372 RT: 5.67-5.93 AV: 60 NL: 1.14E9  
T: FTMS + c ESI Full ms [200.0000-2000.0000]

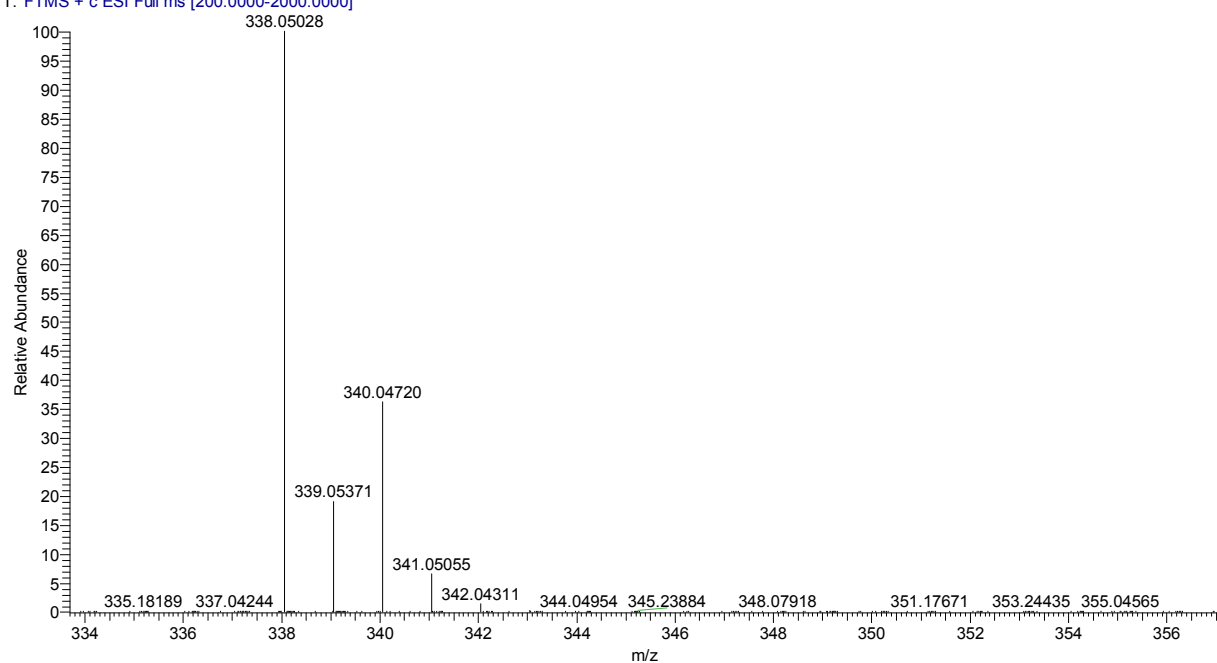



### 4-(Benzo[b]thiophen-2-yl)-N-(3-chlorophenyl)pyrimidin-2-amine (4c)

KG-12 #1313-1372 RT: 5.67-5.93 AV: 60 NL: 1.85E9  
T: FTMS + c ESI Full ms [200.0000-2000.0000]

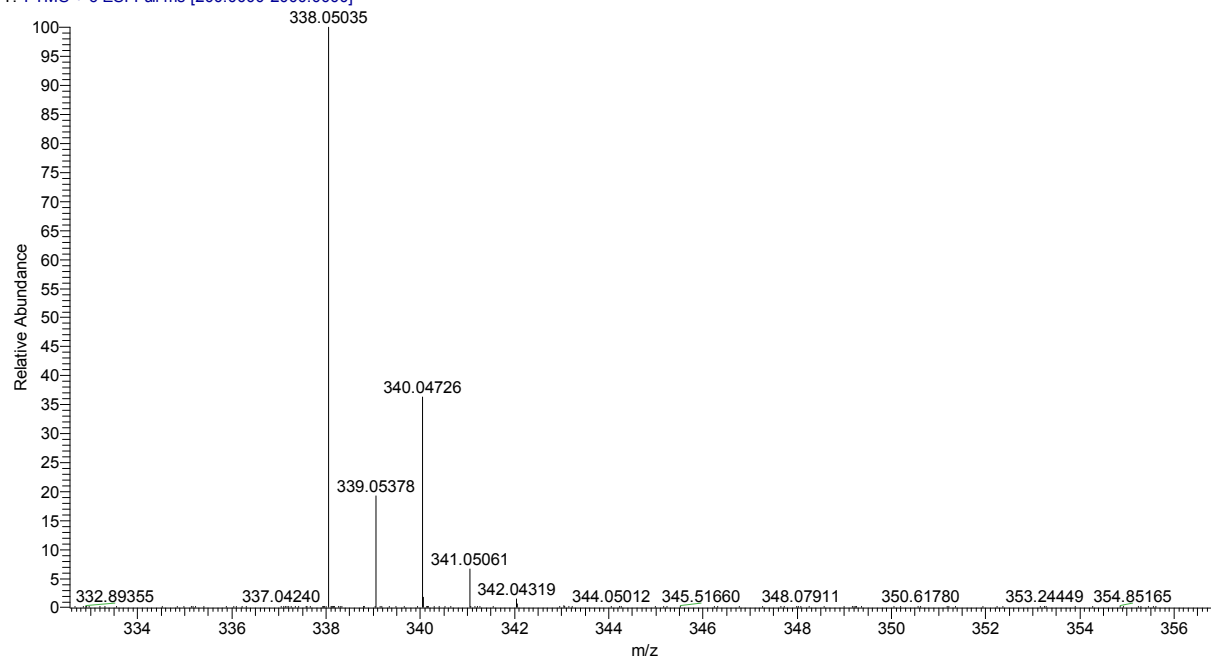

### 4-(Benzo[b]thiophen-2-yl)-N-(2-chlorophenyl)pyrimidin-2-amine (4d)

KG-16 #1365-1402 RT: 5.90-6.06 AV: 38 NL: 2.29E9  
T: FTMS + c ESI Full ms [200.0000-2000.0000]

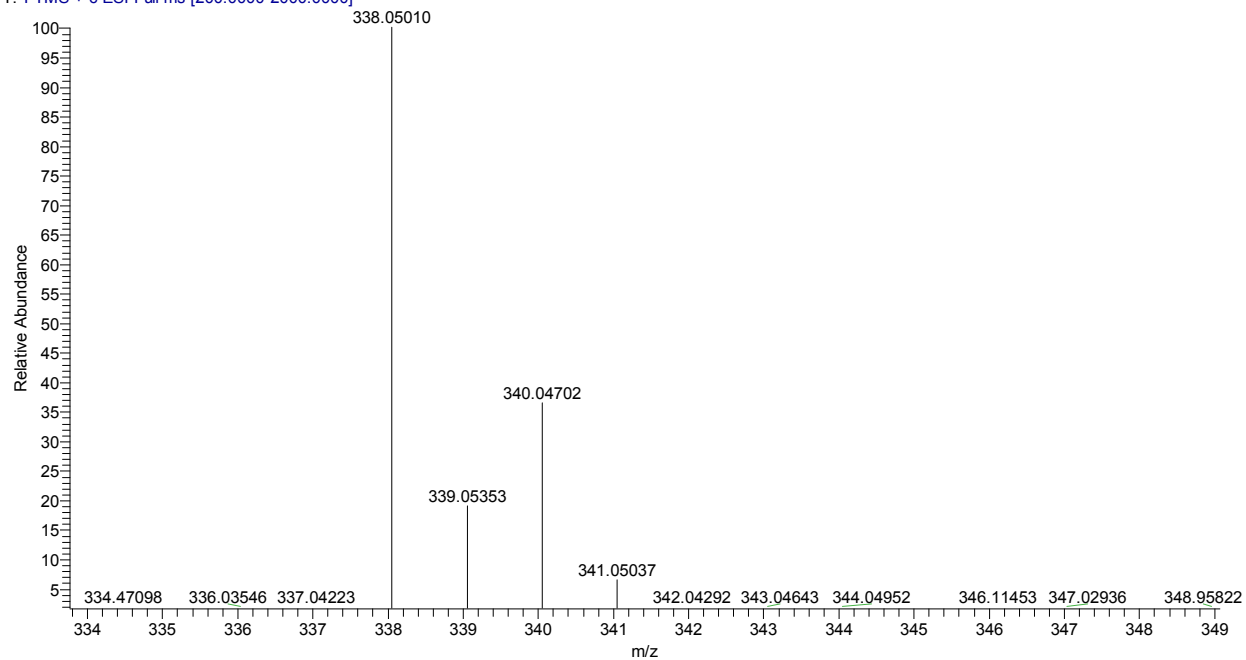

### 4-(Benzo[b]thiophen-2-yl)-N-(4-methoxyphenyl)pyrimidin-2-amine (4e)

KG-18 #1193-1236 RT: 5.15-5.34 AV: 44 NL: 1.03E9  
T: FTMS + c ESI Full ms [200.0000-2000.0000]

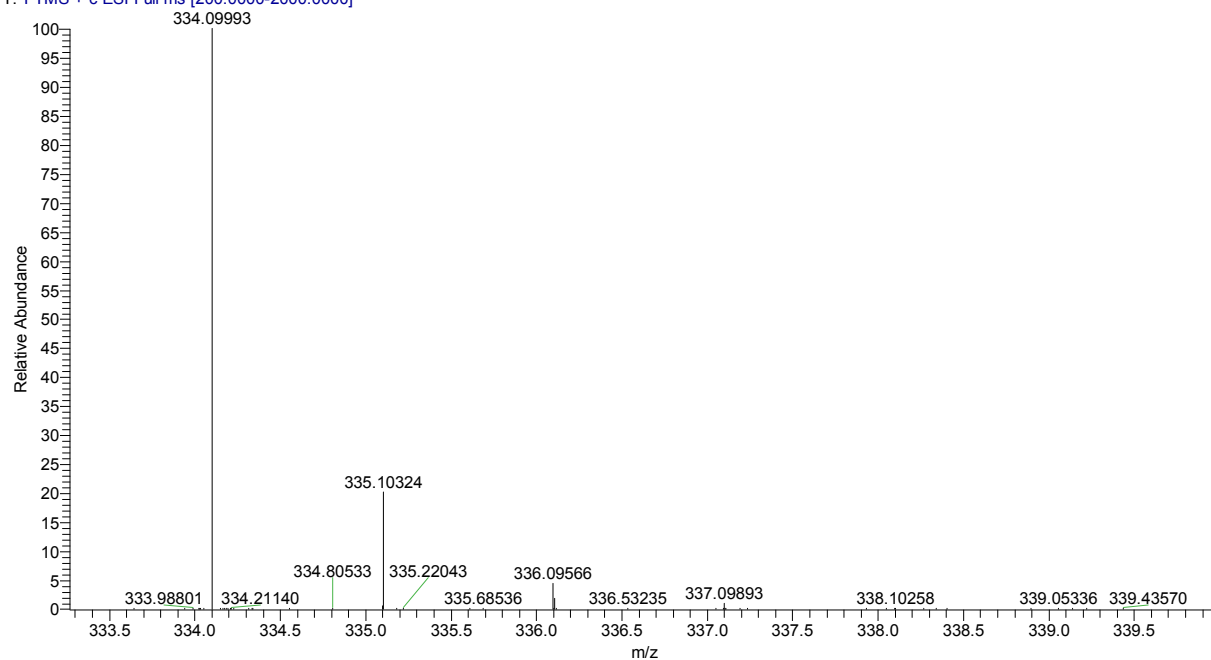

### 4-(Benzo[b]thiophen-2-yl)-N-(3-methoxyphenyl)pyrimidin-2-amine (4f)

KG-19 #1214-1252 RT: 5.25-5.41 AV: 39 NL: 4.98E9  
T: FTMS + c ESI Full ms [200.0000-2000.0000]

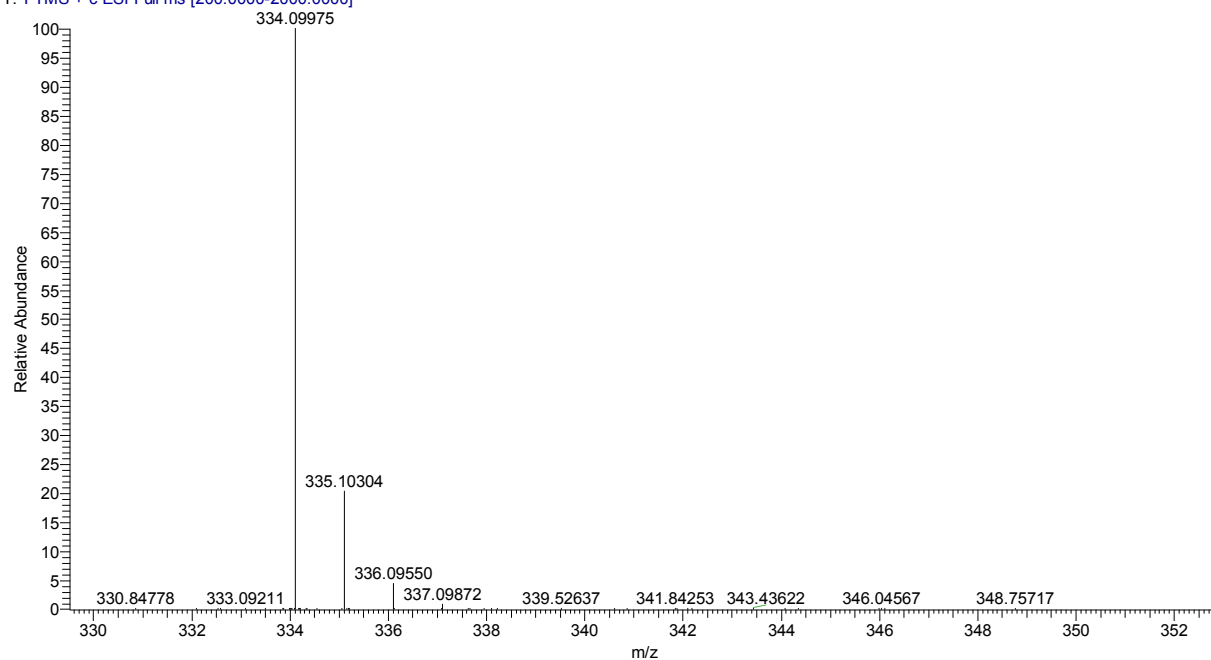

### 4-(Benzo[b]thiophen-2-yl)-N-(2-methoxyphenyl)pyrimidin-2-amine (4g)

KG-20 #1301-1351 RT: 5.62-5.84 AV: 51 NL: 5.90E9  
T: FTMS + c ESI Full ms [200.0000-2000.0000]

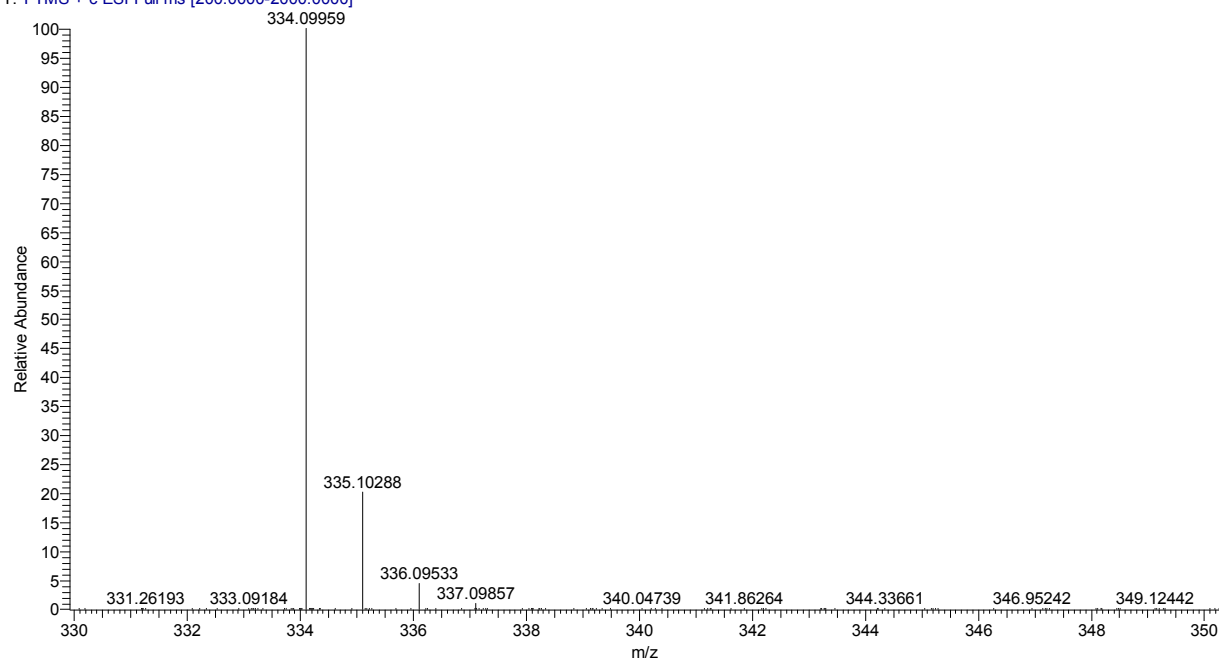

### 4-(Benzo[b]thiophen-2-yl)-N-benzylpyrimidin-2-amine (4h)

KG-8 #1166-1226 RT: 5.04-5.30 AV: 61 NL: 2.79E9  
T: FTMS + c ESI Full ms [200.0000-2000.0000]

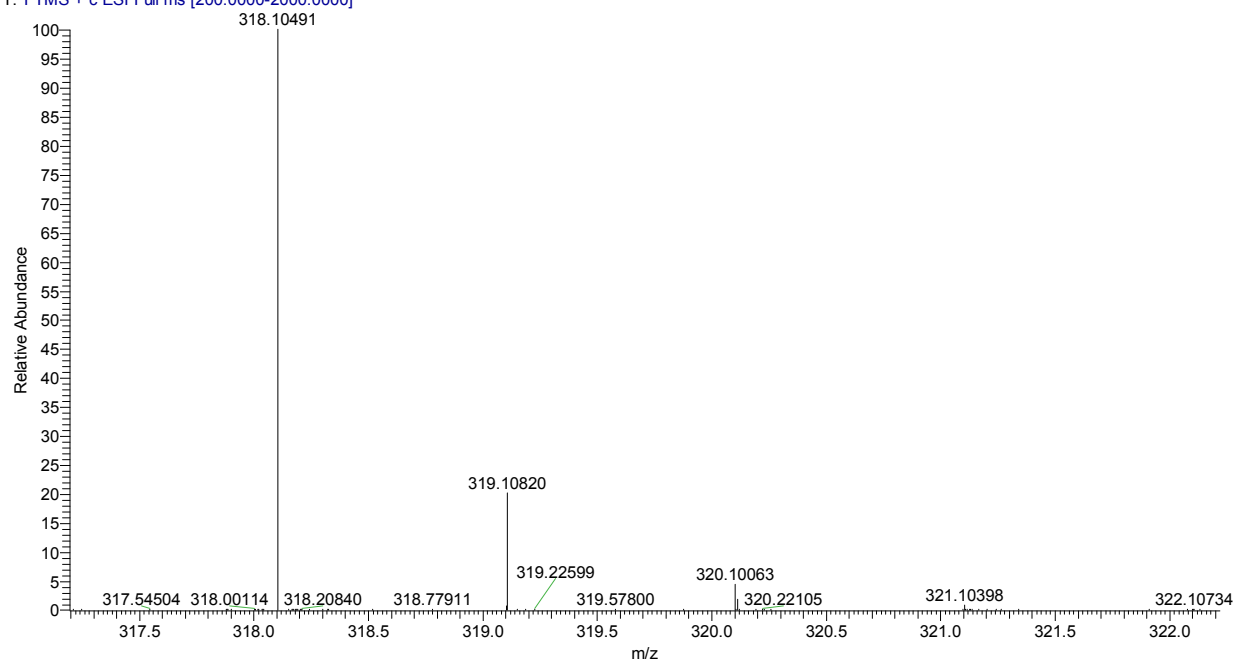

### 4-((4-(Benzo[b]thiophen-2-yl)pyrimidin-2-yl)amino)benzoate (5)

KG-05 #1209-1260 RT: 5.22-5.45 AV: 52 NL: 2.70E9  
T: FTMS + c ESI Full ms [200.0000-2000.0000]

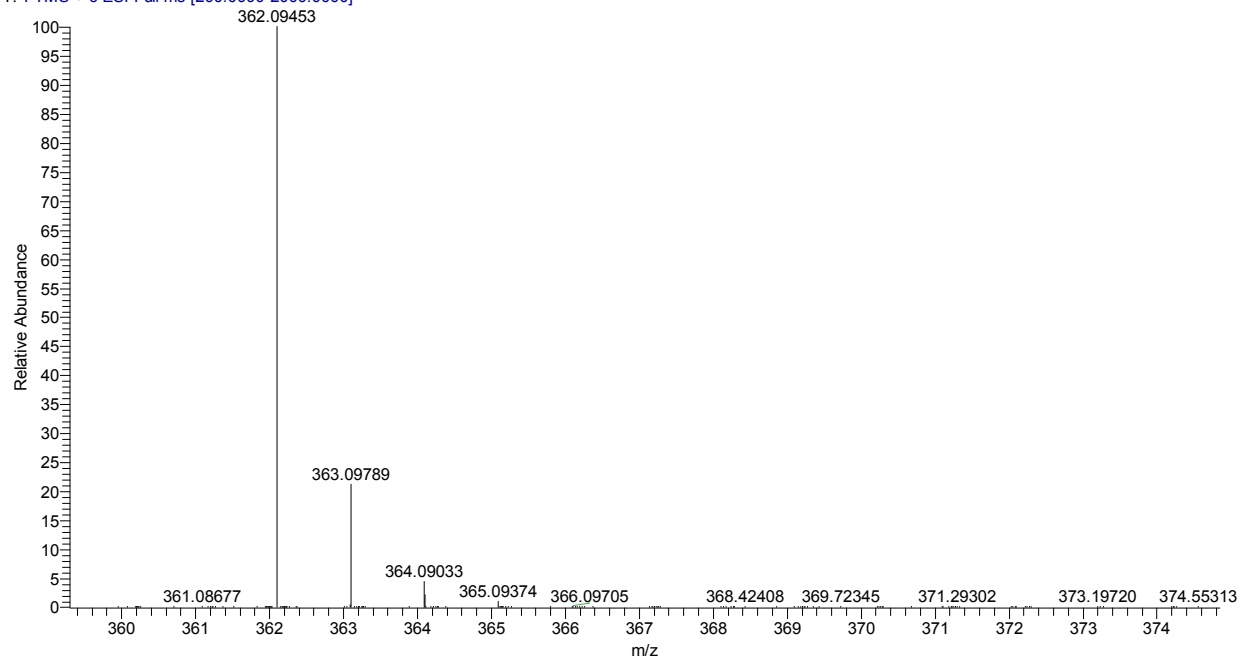

### 4-((4-(Benzo[b]thiophen-2-yl)pyrimidin-2-yl)amino)benzoic acid (6)

KG-06 #1031-1083 RT: 4.45-4.68 AV: 53 NL: 3.18E8  
T: FTMS + c ESI Full ms [200.0000-2000.0000]

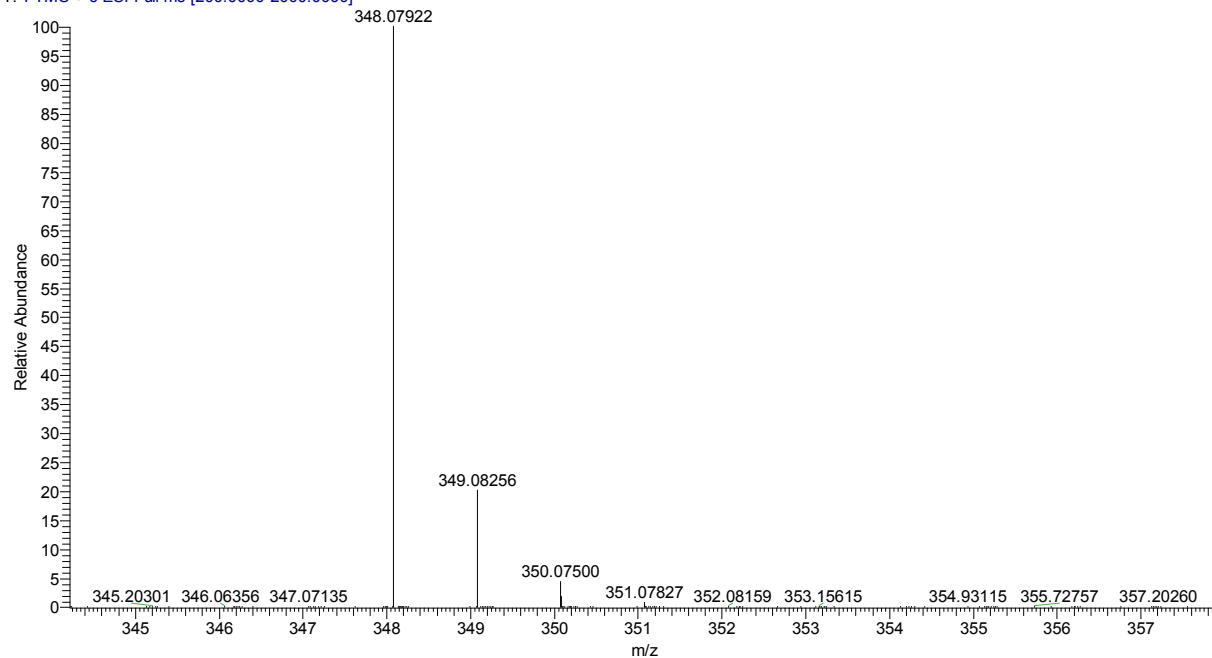

**4-((4-(Benzo[b]thiophen-2-yl)pyrimidin-2-yl)amino)phenyl)(4-(methyl(propyl)amino)piperidin-1-yl)methanone (8a)**

K50B #987-1004 RT: 4.26-4.34 AV: 18 NL: 1.01E9  
T: FTMS + c ESI Full ms [150.0000-2000.0000]

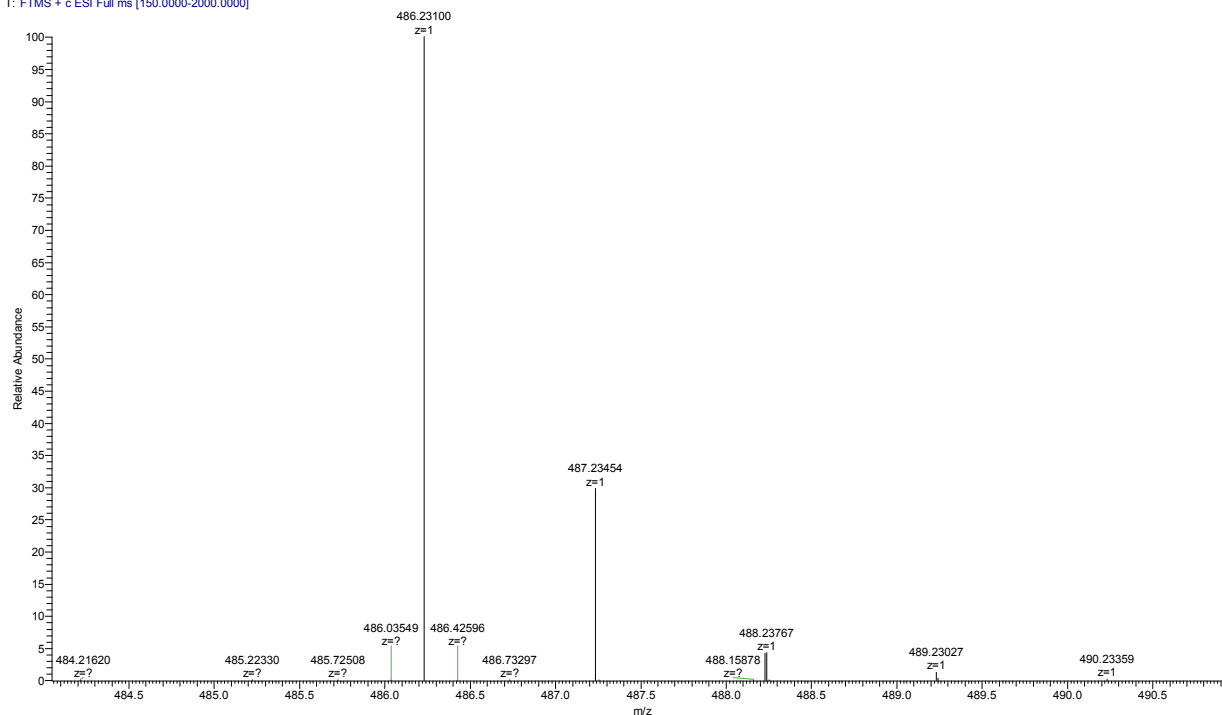

**(R)-4-((4-(Benzo[b]thiophen-2-yl)pyrimidin-2-yl)amino)phenyl)(4-(3-hydroxypyrrolidin-1-yl)piperidin-1-yl)methanone (8b)**

K51 #927-970 RT: 4.01-4.19 AV: 44 NL: 5.17E8  
T: FTMS + c ESI Full ms [150.0000-2000.0000]

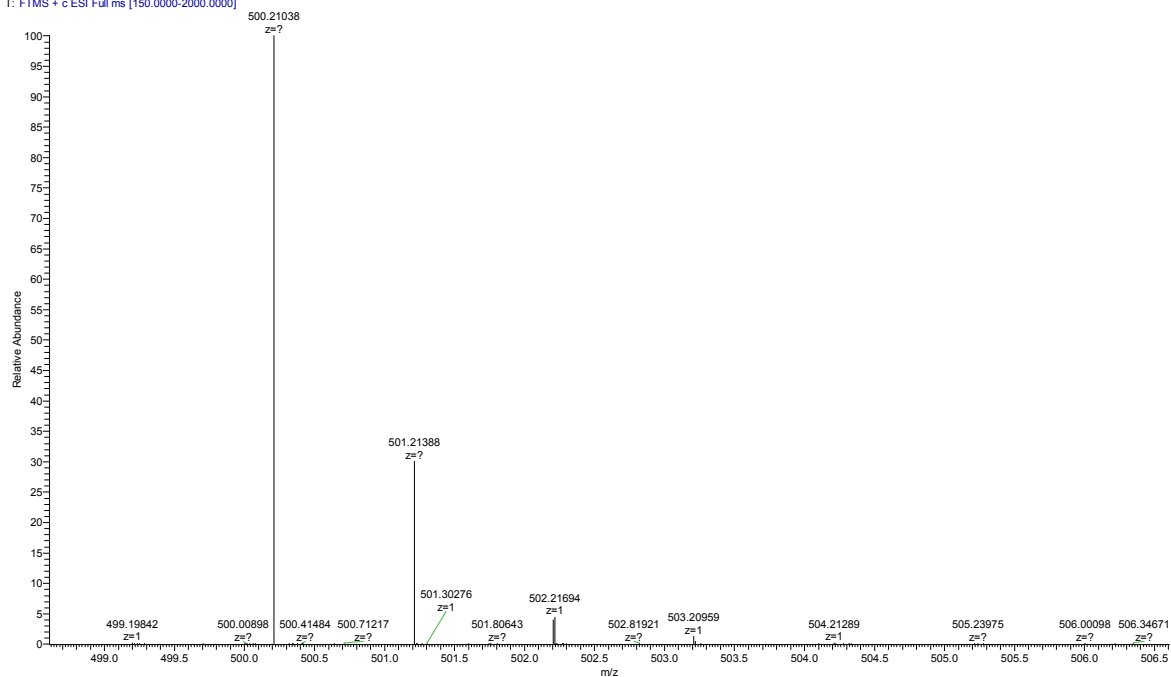

**(S)-4-((4-(Benzo[b]thiophen-2-yl)pyrimidin-2-yl)amino)phenyl)(4-(3-hydroxypyrrolidin-1-yl)piperidin-1-yl)methanone (8c, KG1-052)**

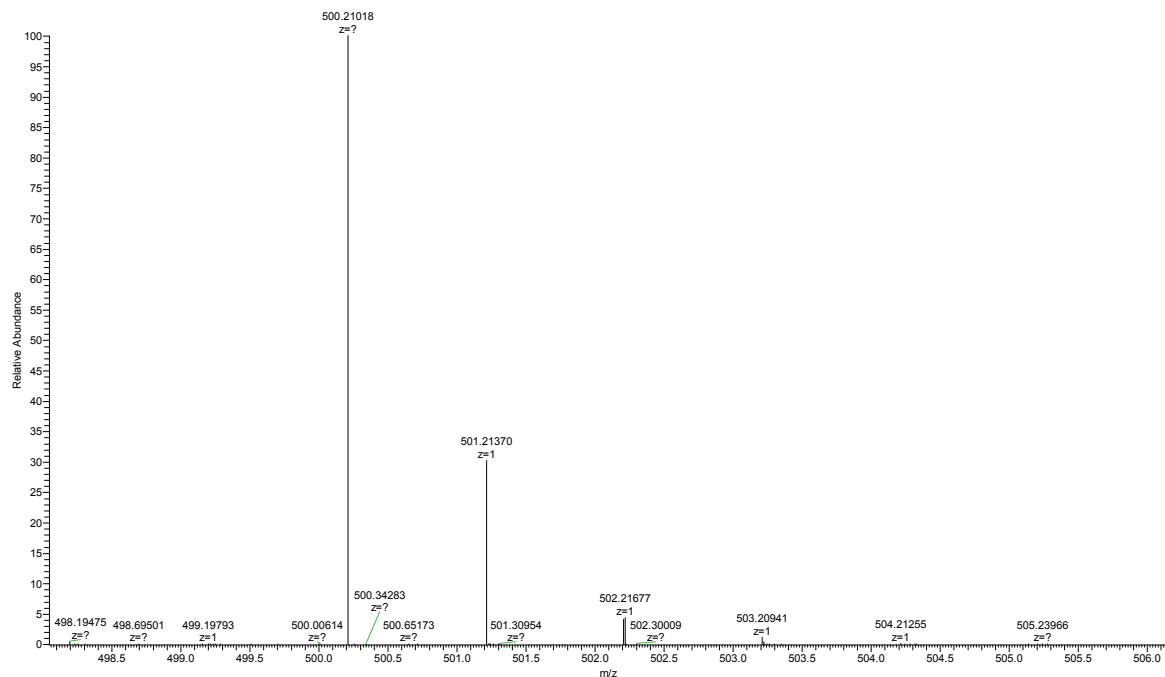

**4-((4-(Benzo[b]thiophen-2-yl)pyrimidin-2-yl)amino)phenyl)(4-(dimethylamino)piperidin-1-yl)methanone (9a)**

K21 #942-976 RT: 4.07-4.22 AV: 35 NL: 1.64E9  
T: FTMS + c ESI Full ms [150.0000-2000.0000]

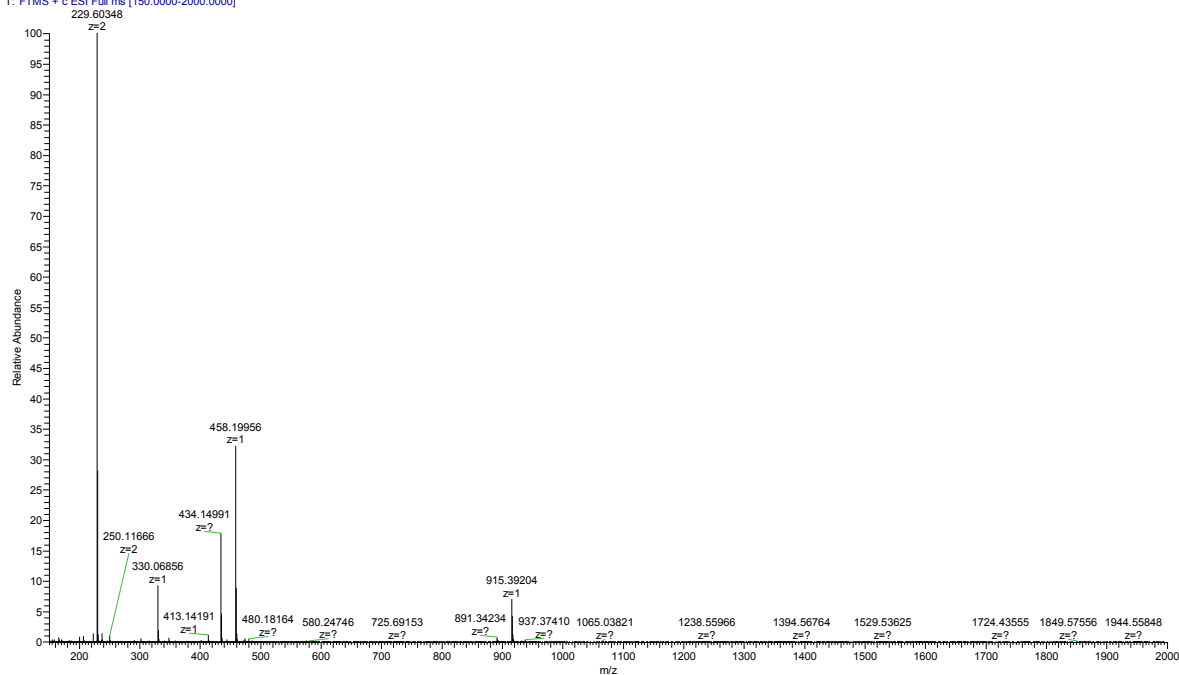

**[1,4'-Bipiperidin]-1'-yl(4-((4-(benzo[b]thiophen-2-yl)pyrimidin-2-yl)amino)phenyl)methanone (9b)**

K48 #974-1008 RT: 4.21-4.36 AV: 35 NL: 1.12E9  
T: FTMS + c ESI Full ms [150.0000-2000.0000]

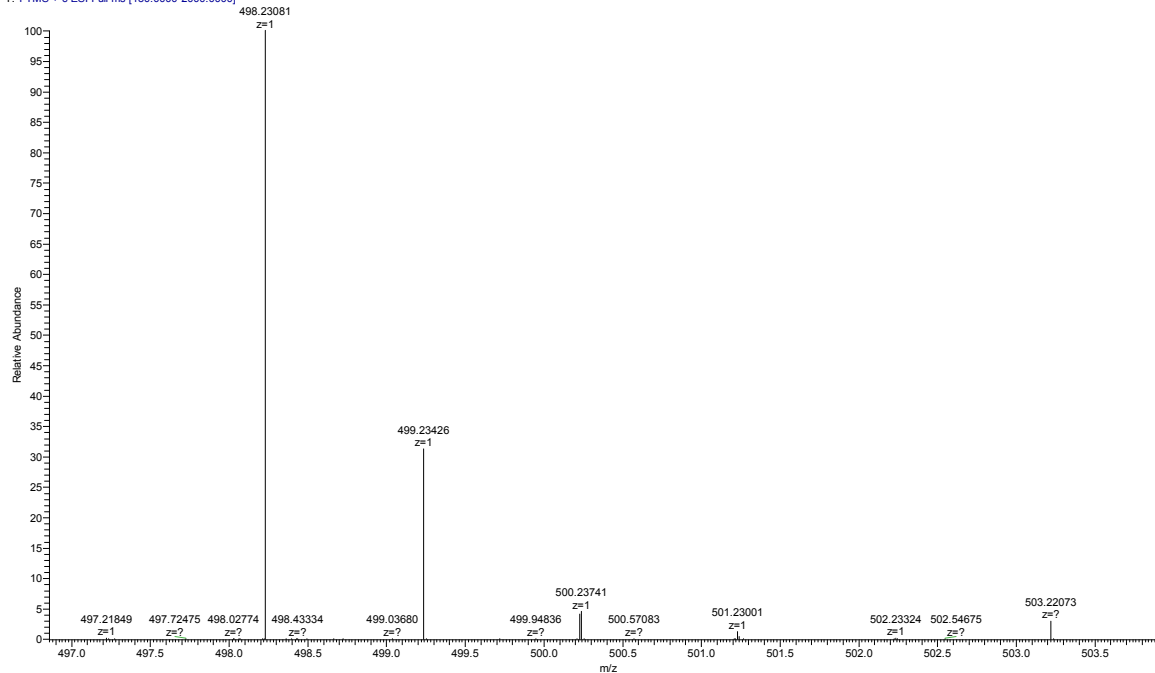

**(4-((4-(Benzo[b]thiophen-2-yl)pyrimidin-2-yl)amino)phenyl)(piperazin-1-yl)methanone (9c)**

K30 #924-941 RT: 3.99-4.07 AV: 18 NL: 4.45E8  
T: FTMS + c ESI Full ms [150.0000-2000.0000]

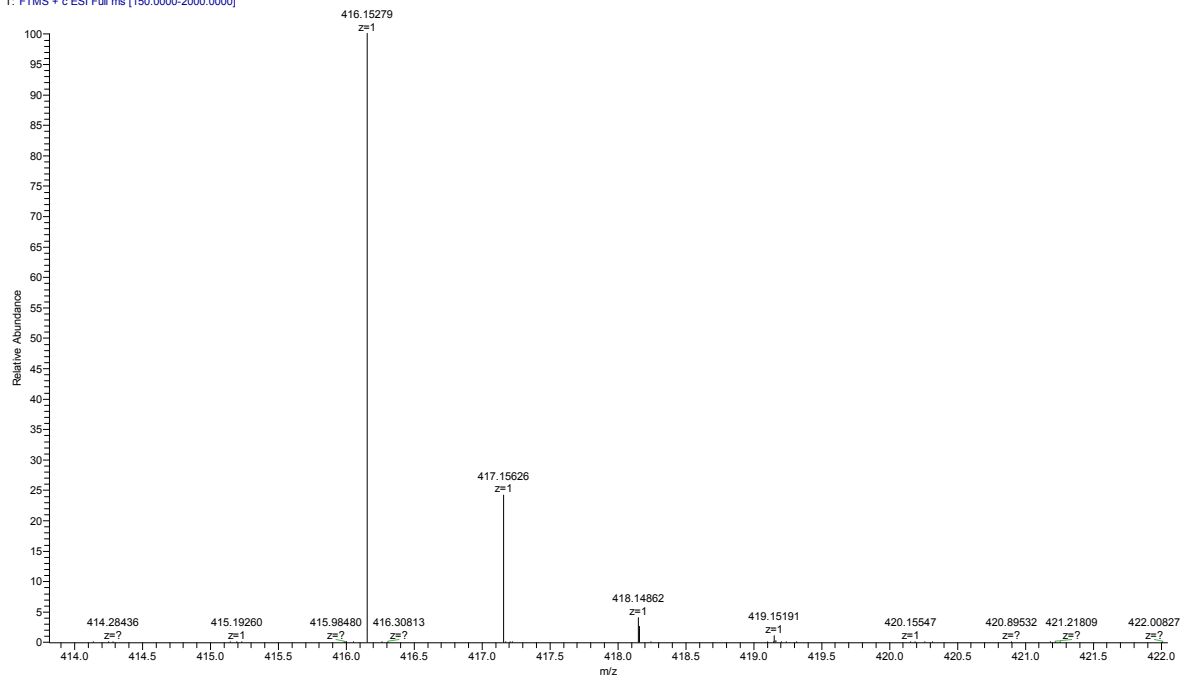

**4-((4-(Benzo[b]thiophen-2-yl)pyrimidin-2-yl)amino)phenyl)(4-methylpiperazin-1-yl)methanone (9d)**

K22 #925-980 RT: 4.00-4.23 AV: 56 NL: 2.26E9  
T: FTMS + c ESI Full ms [150.0000-2000.0000]

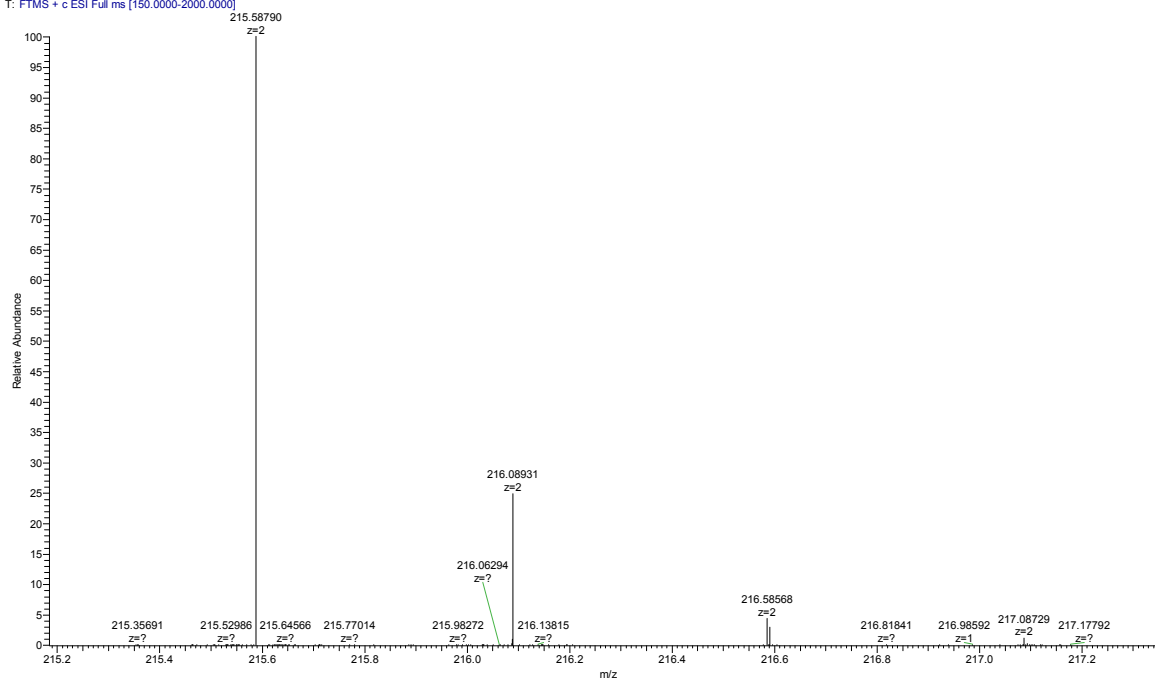

**4-((4-(Benzo[b]thiophen-2-yl)pyrimidin-2-yl)amino)-N-(1-methylpiperidin-4-yl)benzamide (9e)**

K24 #945-982 RT: 4.08-4.24 AV: 38 NL: 1.55E9  
T: FTMS + c ESI Full ms [150.0000-2000.0000]

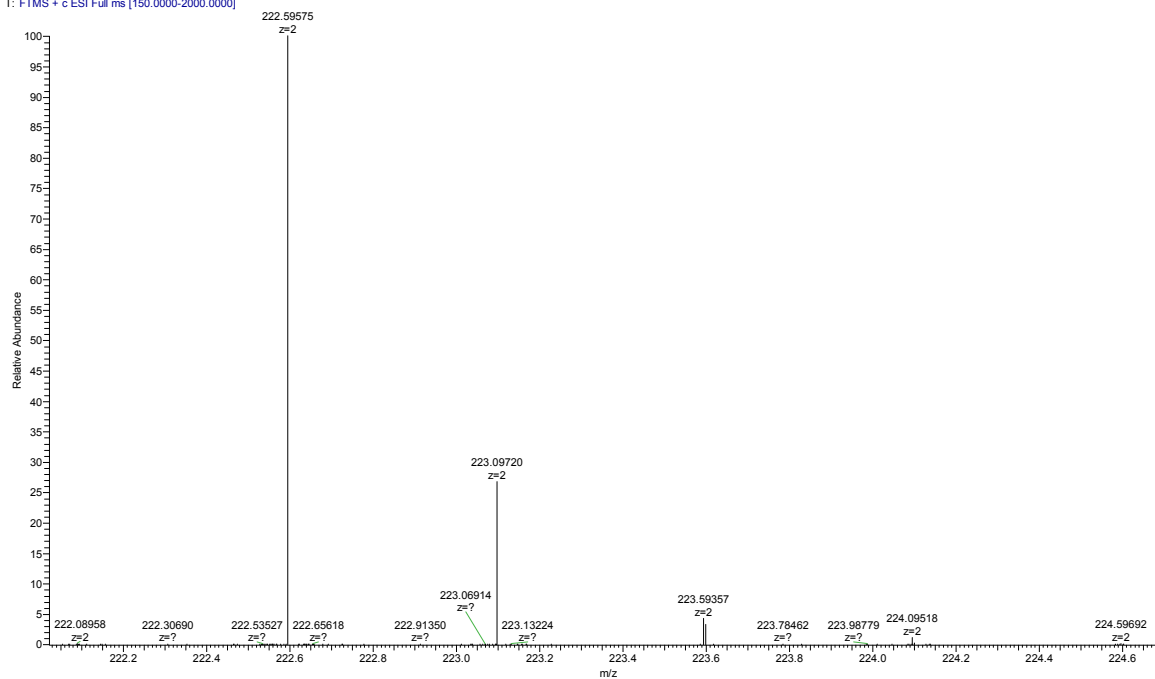



4-((4-(Benzo[b]thiophen-2-yl)pyrimidin-2-yl)amino)-N-(3-(4-methylpiperazin-1-yl)propyl)benzamide (9f)

K47 #880-911 RT: 3.80-3.94 AV: 32 NL: 2.04E9  
T: FTMS + c ESI Full ms [150.0000-2000.0000]

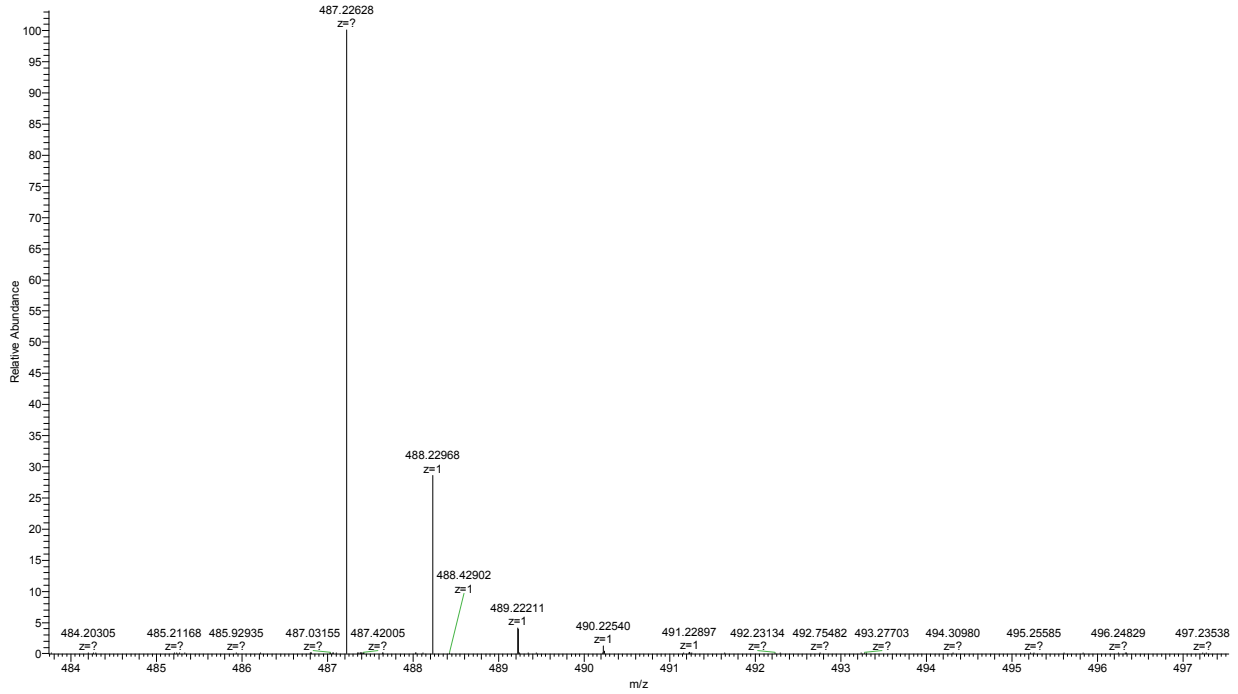

4-((4-(Benzo[b]thiophen-2-yl)pyrimidin-2-yl)amino)-N-(3-morpholinopropyl)benzamide (9g)

K27 #945-1006 RT: 4.08-4.35 AV: 62 NL: 3.14E9  
T: FTMS + c ESI Full ms [150.0000-2000.0000]

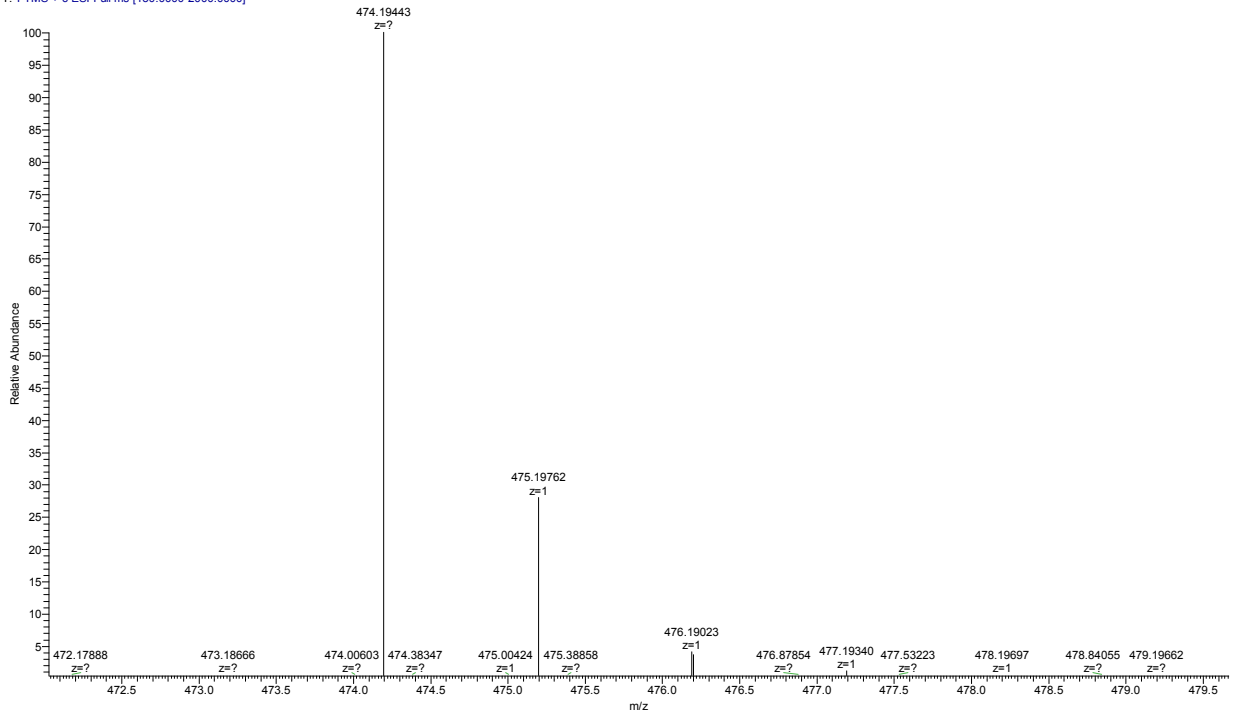

### 4-((4-(Benzo[b]thiophen-2-yl)pyrimidin-2-yl)amino)-N-(3-(dimethylamino)propyl)benzamide (9h)

K23 #955-1000 RT: 4.13-4.32 AV: 46 NL: 1.96E9  
T: FTMS + c ESI Full ms [150.0000-2000.0000]

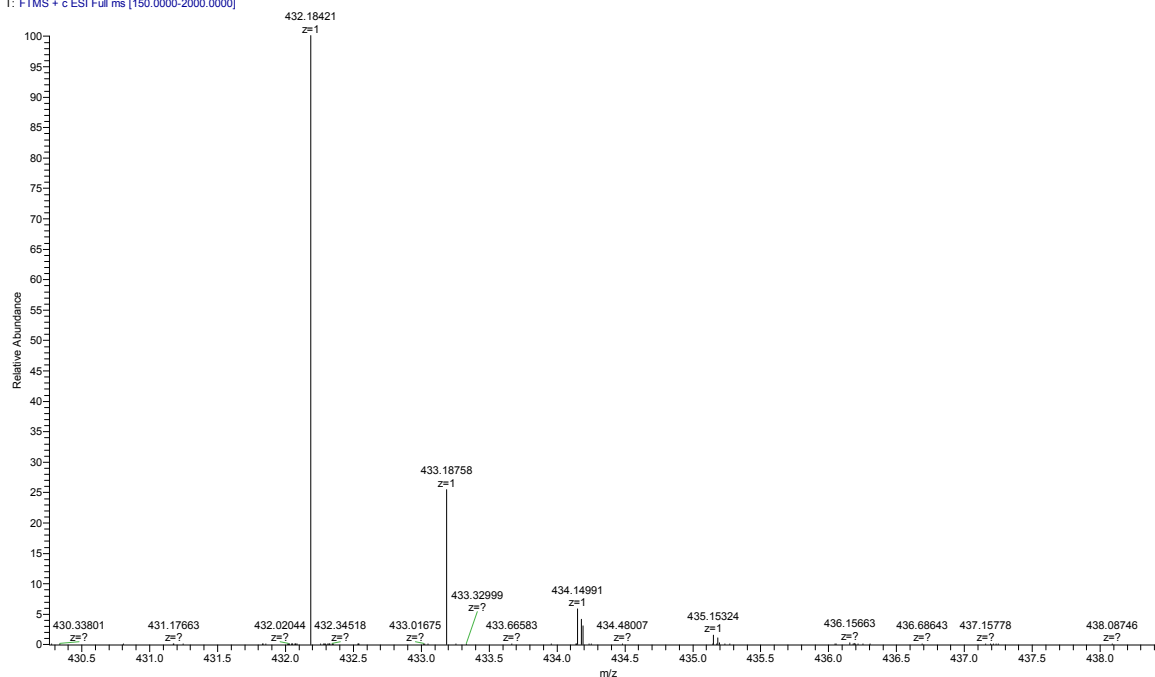

### 4-((4-(Benzo[b]thiophen-2-yl)pyrimidin-2-yl)amino)-N-(3-(methylsulfonyl)propyl)benzamide (9i)

K31 #1109-1152 RT: 4.79-4.98 AV: 44 NL: 1.96E9  
T: FTMS + c ESI Full ms [150.0000-2000.0000]

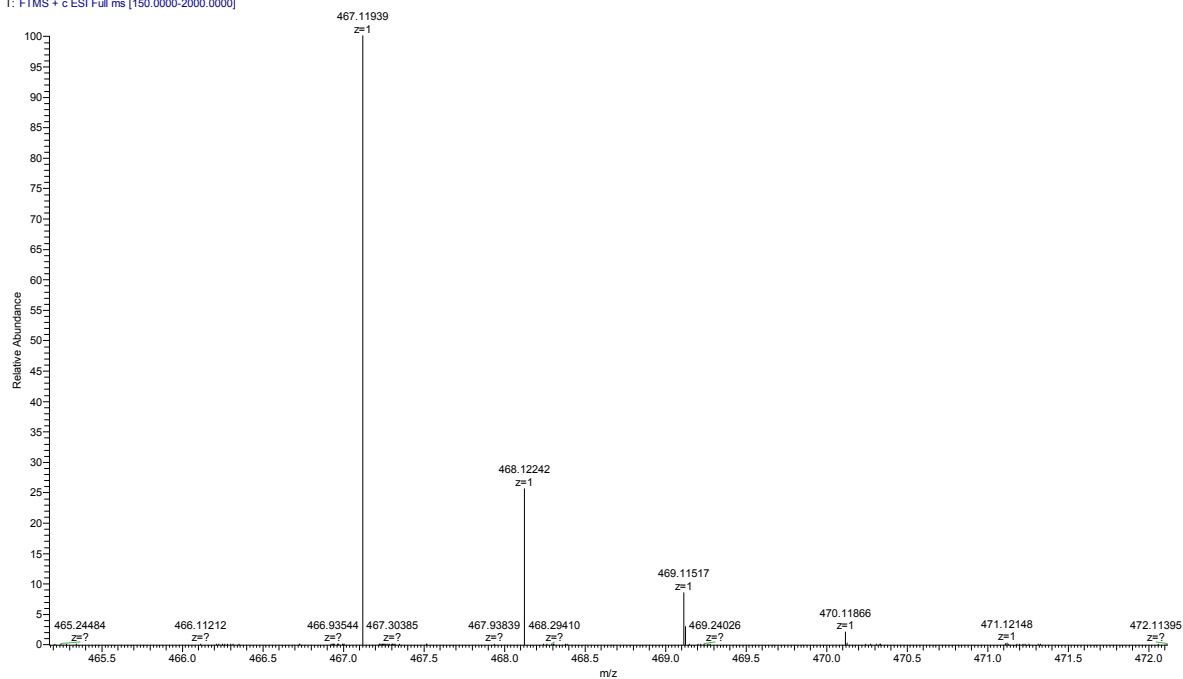

### 4-((4-(Benzo[b]thiophen-2-yl)pyrimidin-2-yl)amino)-N-cyclopropylbenzamide (9j)

K25 #1202-1236 RT: 5.19-5.34 AV: 35 NL: 1.39E9  
T: FTMS + c ESI Full ms [150.0000-2000.0000]

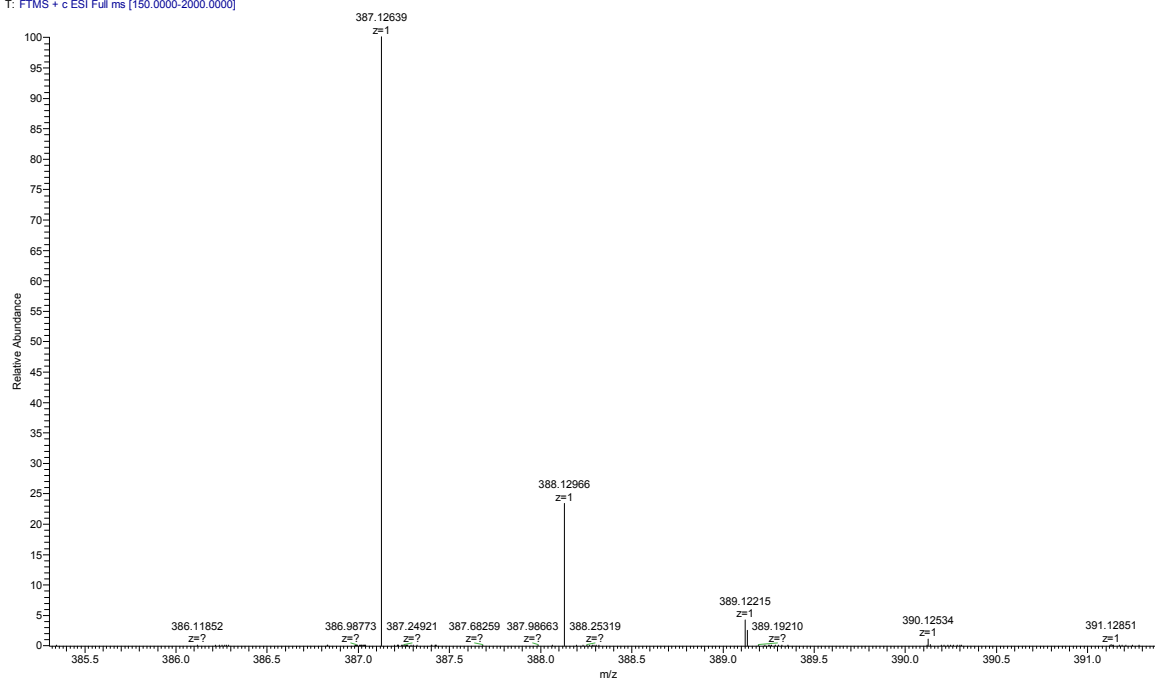

### 4-((4-(Benzo[b]thiophen-2-yl)pyrimidin-2-yl)amino)-N-(1-methyl-1H-pyrazol-4-yl)benzamide (9k)

K32 #1154-1196 RT: 4.99-5.17 AV: 43 NL: 1.23E9  
T: FTMS + c ESI Full ms [150.0000-2000.0000]

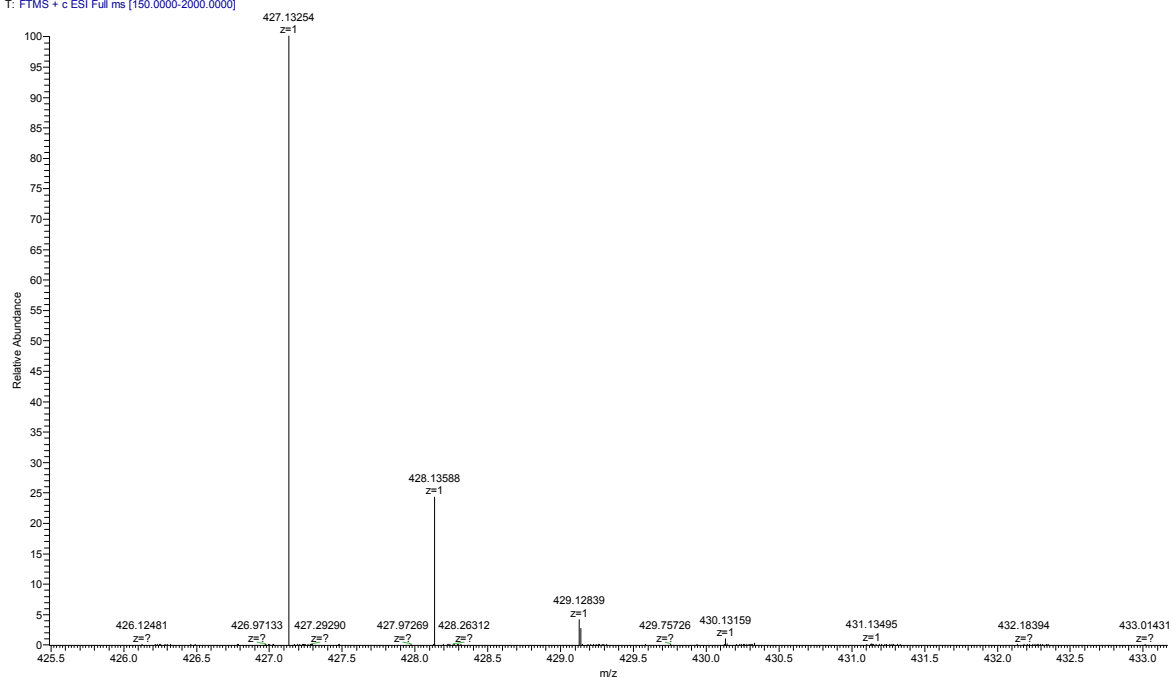

**4-(Benzo[b]thiophen-2-yl)-N-(4-((4-(pyrrolidin-1-yl)piperidin-1-yl)methyl)phenyl)pyrimidin-2-amine (12)**

KG-35 #722-782 RT: 3.12-3.38 AV: 61 NL: 3.30E8  
T: FTMS + c ESI Full ms [200.0000-2000.0000]

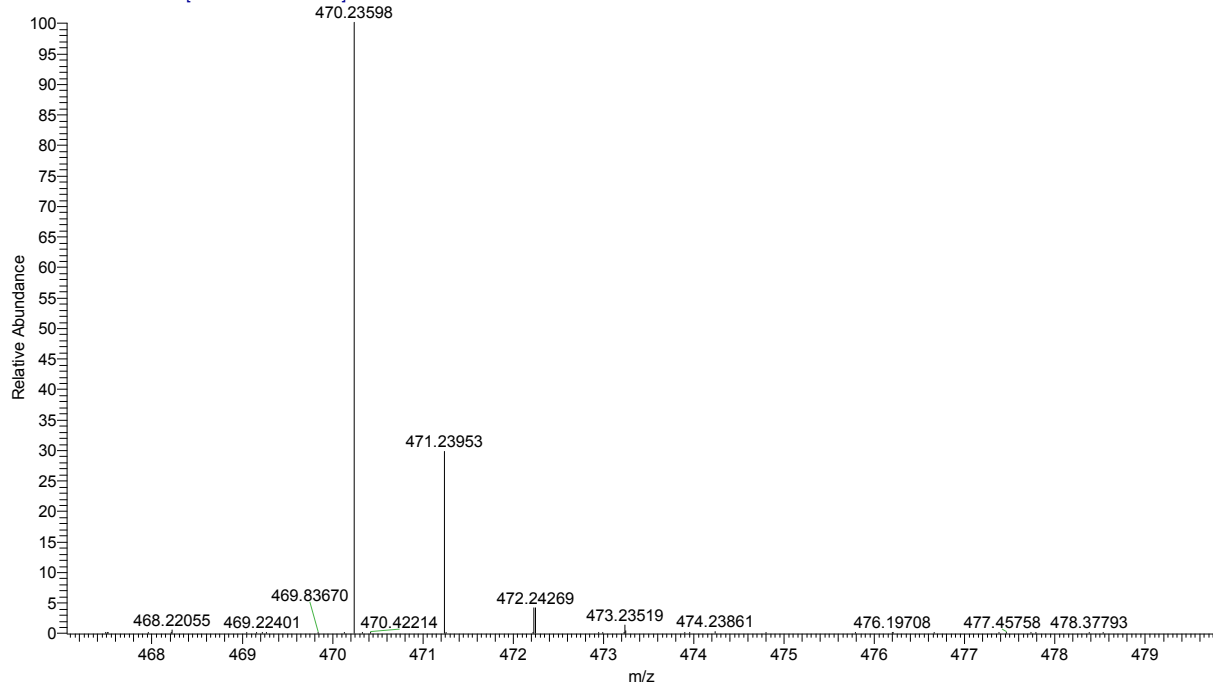

**4-((4-(Benzofuran-2-yl)pyrimidin-2-yl)amino)phenyl)(4-(pyrrolidin-1-yl)piperidin-1-yl)methanone (18a)**

K6 #843-920 RT: 3.64-3.98 AV: 78 NL: 3.32E8  
T: FTMS + c ESI Full ms [120.0000-1800.0000]

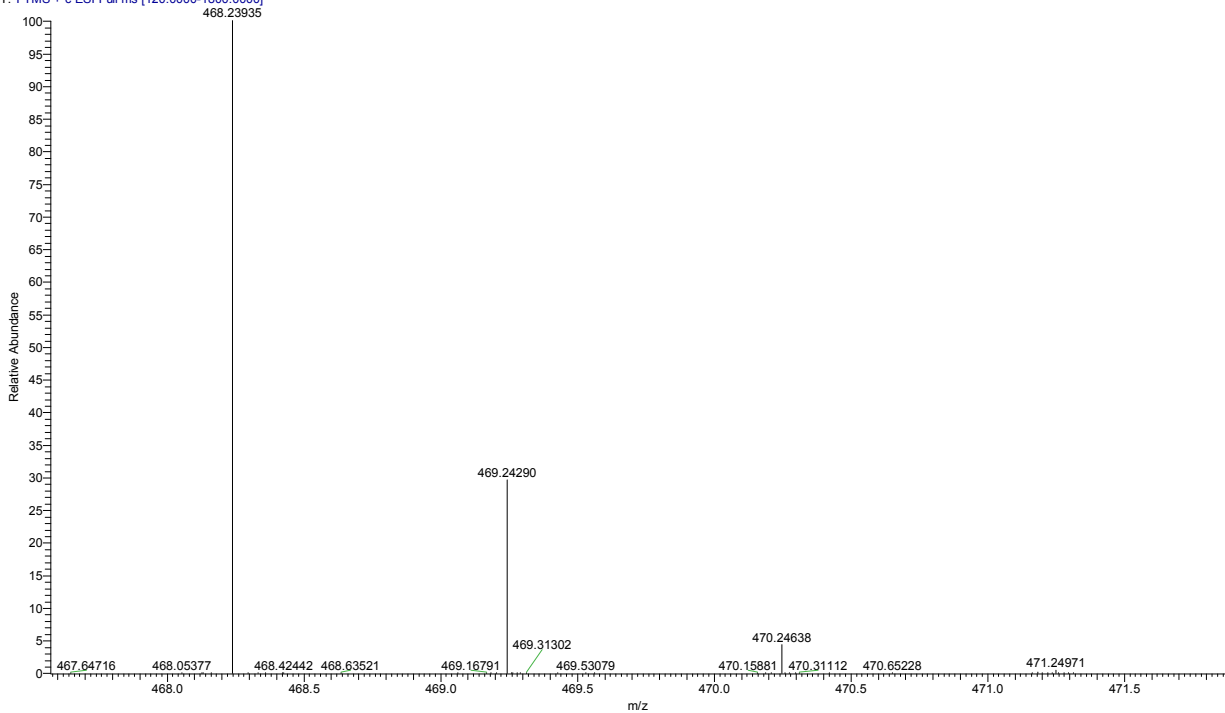

**(4-((4-(Naphthalen-2-yl)pyrimidin-2-yl)amino)phenyl)(4-(pyrrolidin-1-yl)piperidin-1-yl)methanone (18b)**

K33 #862-939 RT: 3.72-4.06 AV: 78 NL: 4.41E8  
T: FTMS + c ESI Full ms [120.0000-1800.0000]

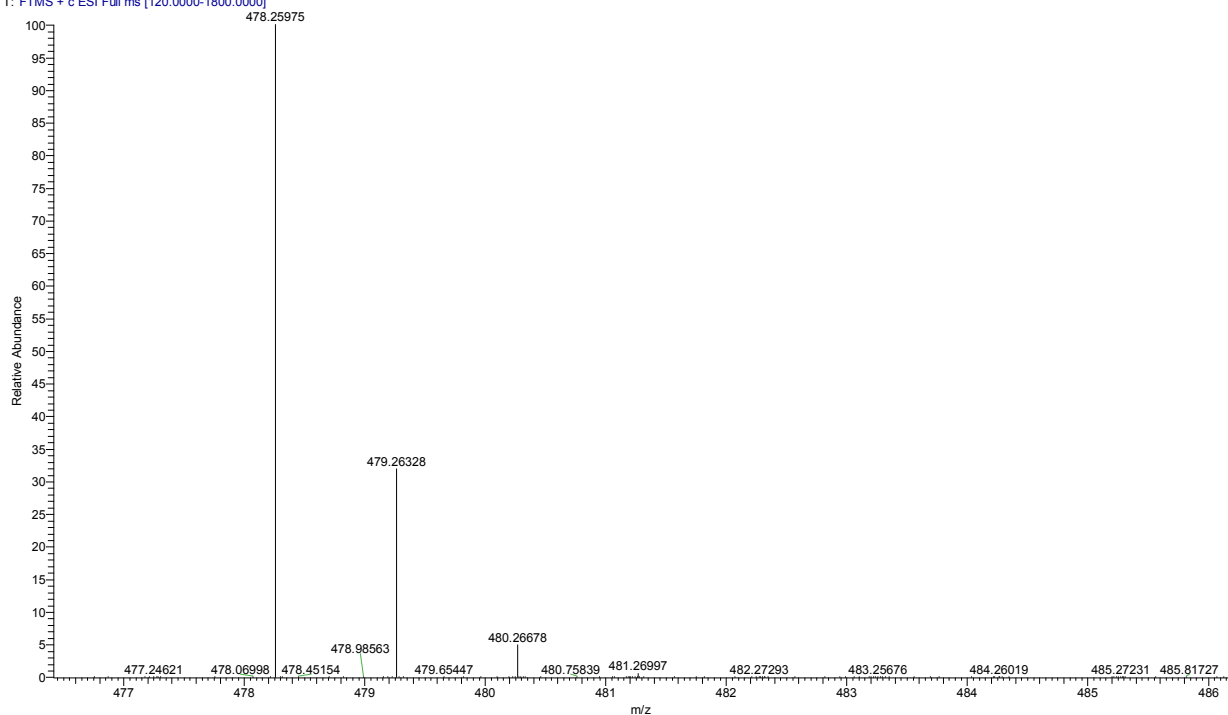

**(4-(Pyrrolidin-1-yl)piperidin-1-yl)(4-((4-(thiophen-2-yl)pyrimidin-2-yl)amino)phenyl)methanone (18c)**

K4 #707-802 RT: 3.05-3.47 AV: 96 NL: 1.95E8  
T: FTMS + c ESI Full ms [120.0000-1800.0000]

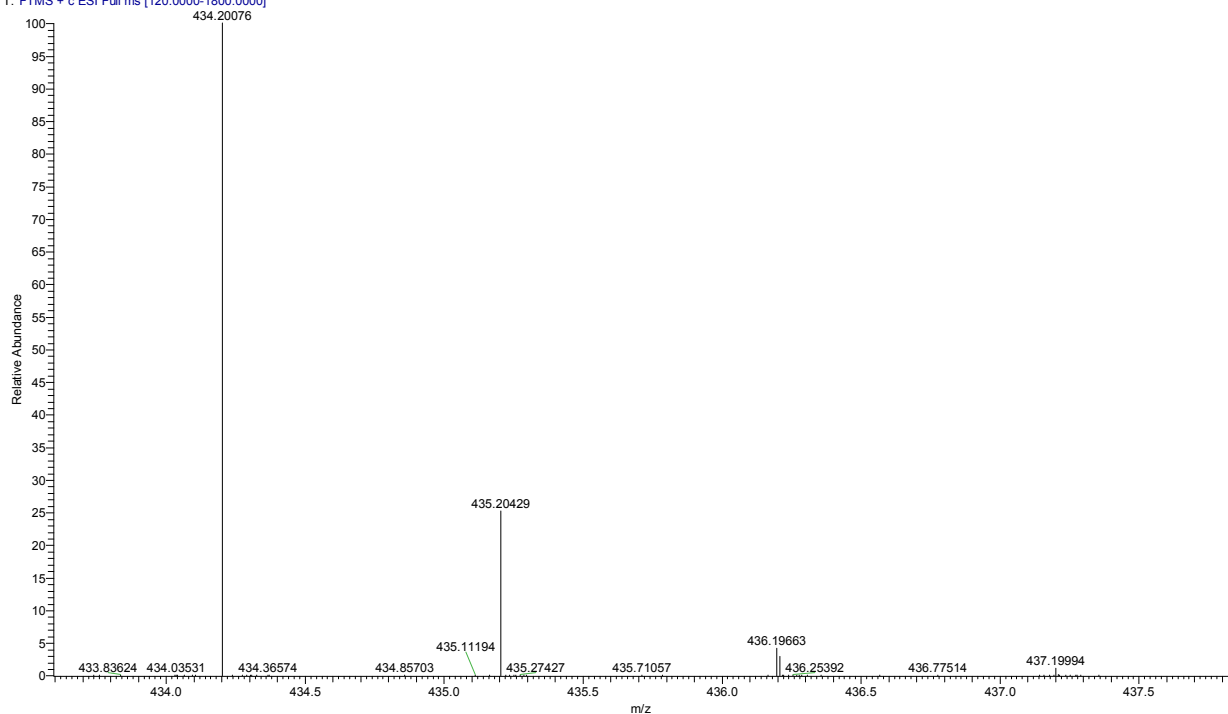

**(4-(Pyrrolidin-1-yl)piperidin-1-yl)(4-((4-(thiazol-2-yl)pyrimidin-2-yl)amino)phenyl)methanone (18d)**

KG-65 #638-715 RT: 2.76-3.09 AV: 78 NL: 3.34E8  
T: FTMS + c ESI Full ms [200.0000-2000.0000]

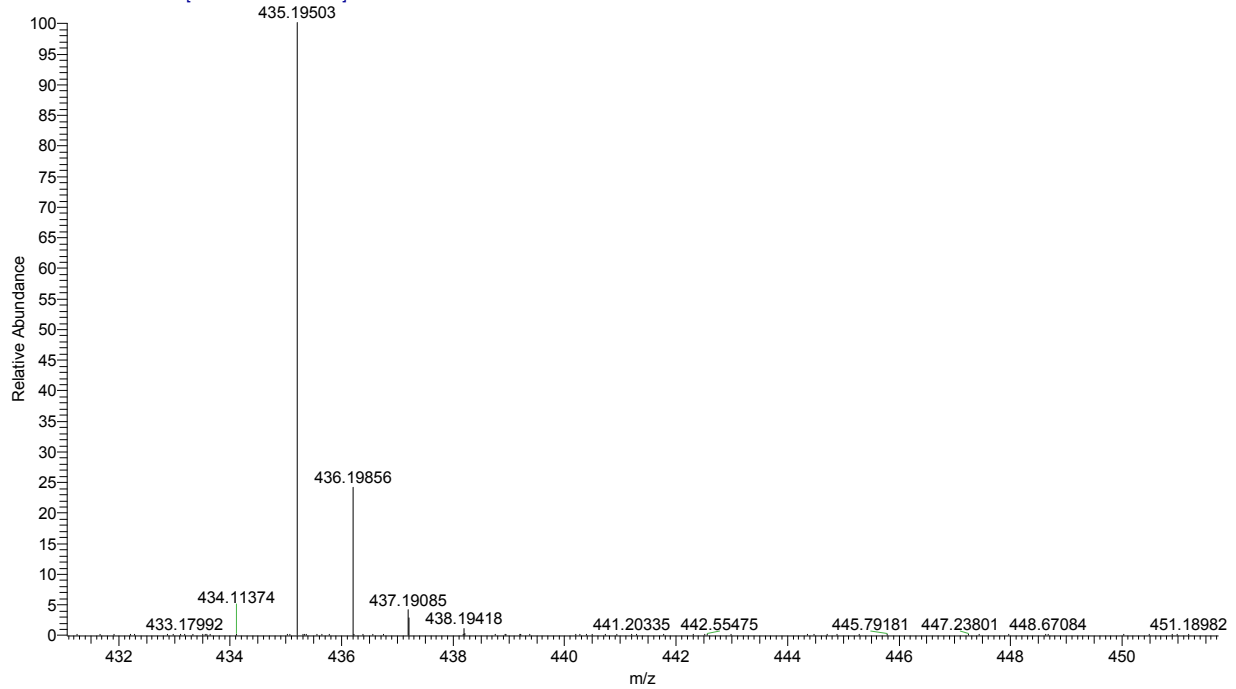

**(4-((4-(Furan-2-yl)pyrimidin-2-yl)amino)phenyl)(4-(pyrrolidin-1-yl)piperidin-1-yl)methanone (18e)**

K24 #691-749 RT: 2.99-3.24 AV: 59 NL: 2.33E9  
T: FTMS + c ESI Full ms [120.0000-1800.0000]

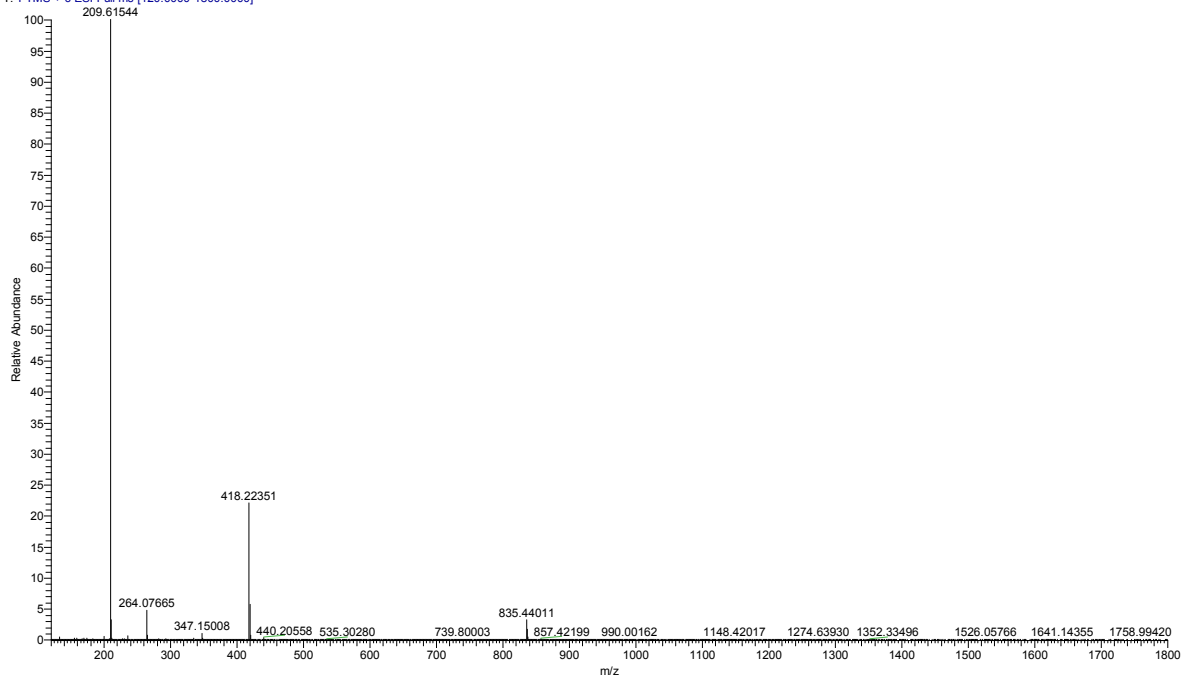

***4-((4-(1-Methyl-1H-pyrazol-4-yl)pyrimidin-2-yl)amino)phenyl)(4-(pyrrolidin-1-yl)piperidin-1-yl)methanone (18f)***

K30 #586-655 RT: 2.53-2.83 AV: 70 NL: 1.62E8  
T: FTMS + c ESI Full ms [120.0000-1800.0000]

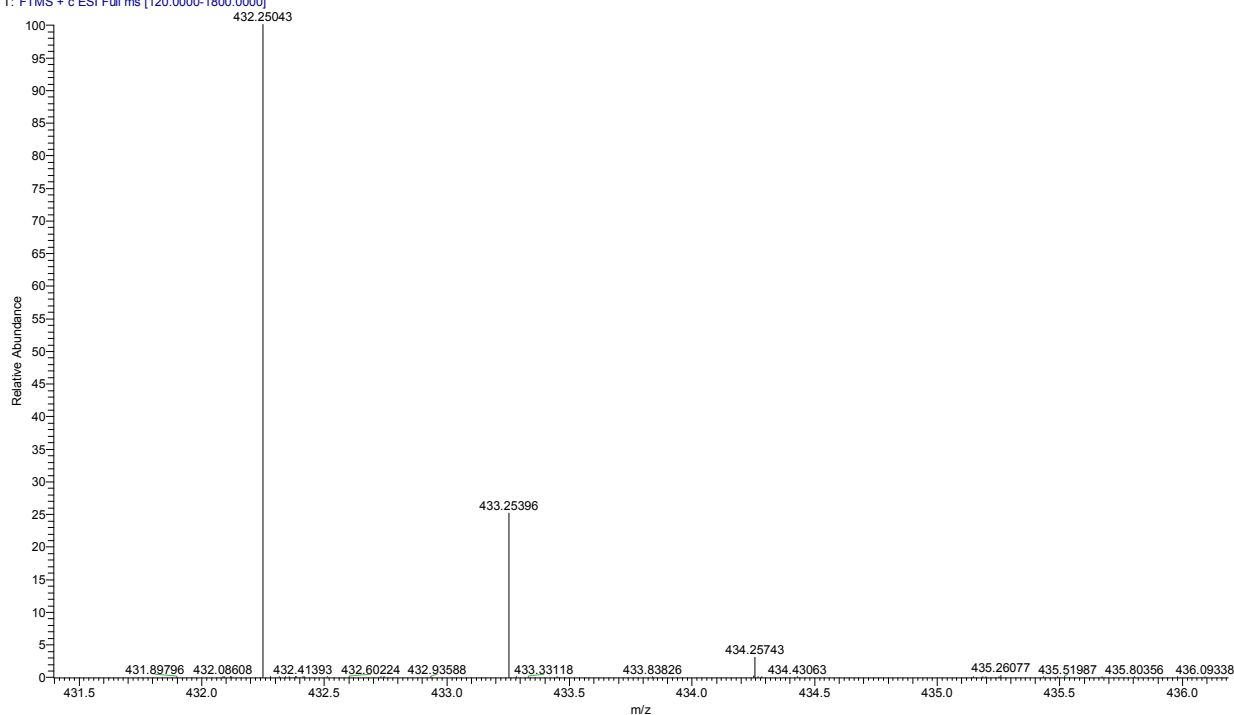

***4-((4-Phenylpyrimidin-2-yl)amino)phenyl)(4-(pyrrolidin-1-yl)piperidin-1-yl)methanone (18g)***

KG-62 #748-798 RT: 3.23-3.45 AV: 51 NL: 3.83E8  
T: FTMS + c ESI Full ms [200.0000-2000.0000]

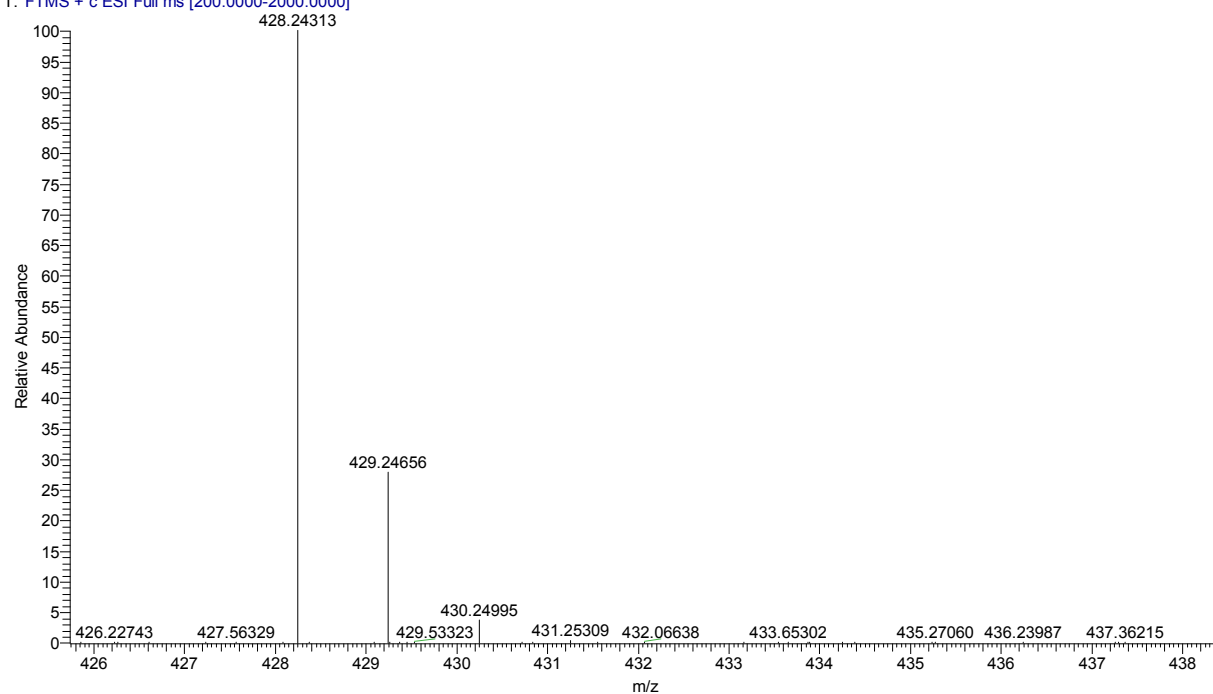

**(4-((4-(3,4-Dichlorophenyl)pyrimidin-2-yl)amino)phenyl)(4-(pyrrolidin-1-yl)piperidin-1-yl)methanone (18h)**

KG-63 #880-944 RT: 3.80-4.08 AV: 65 NL: 2.33E8  
T: FTMS + c ESI Full ms [200.0000-2000.0000]

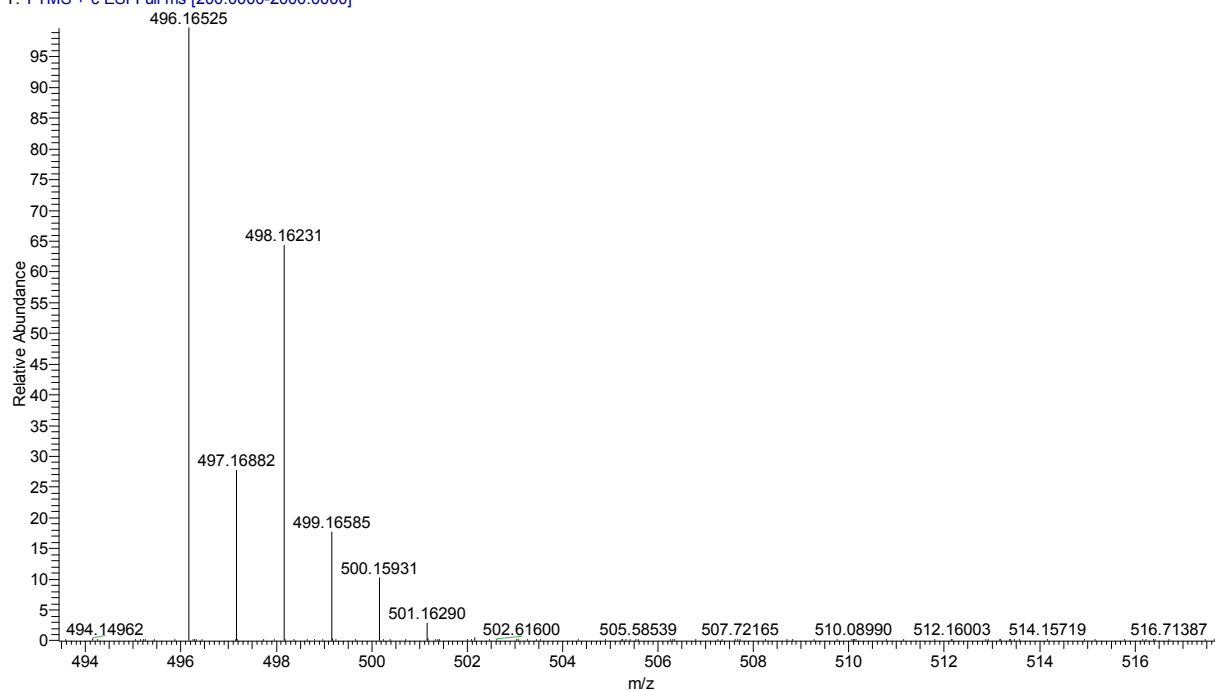

**(4-((4-(5-Methylthiophen-2-yl)pyrimidin-2-yl)amino)phenyl)(4-(pyrrolidin-1-yl)piperidin-1-yl)methanone (18i)**

K10 #770-837 RT: 3.33-3.62 AV: 68 NL: 3.70E8  
T: FTMS + c ESI Full ms [120.0000-1800.0000]

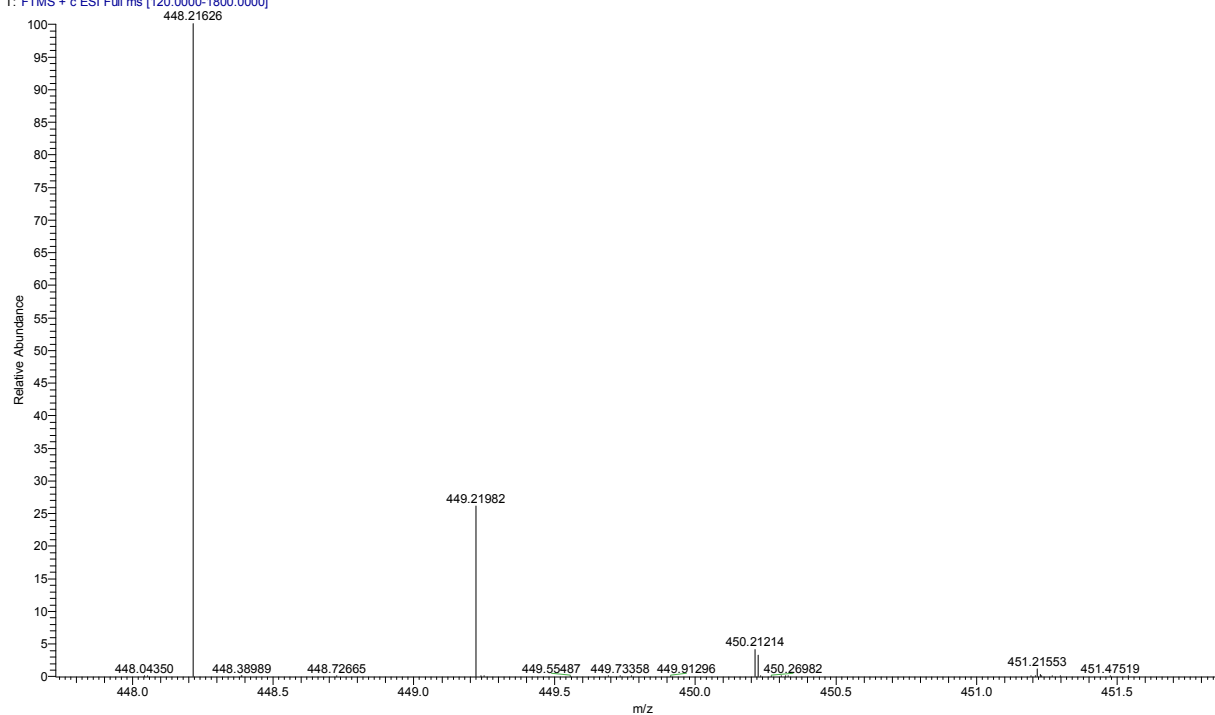



**(4-((4-(5-Chlorothiophen-2-yl)pyrimidin-2-yl)amino)phenyl)(4-(pyrrolidin-1-yl)piperidin-1-yl)methanone (18j)**

K11 #797-879 RT: 3.44-3.80 AV: 63 NL: 1.72E9  
T: FTMS + c ESI Full ms [120.0000-1800.0000]

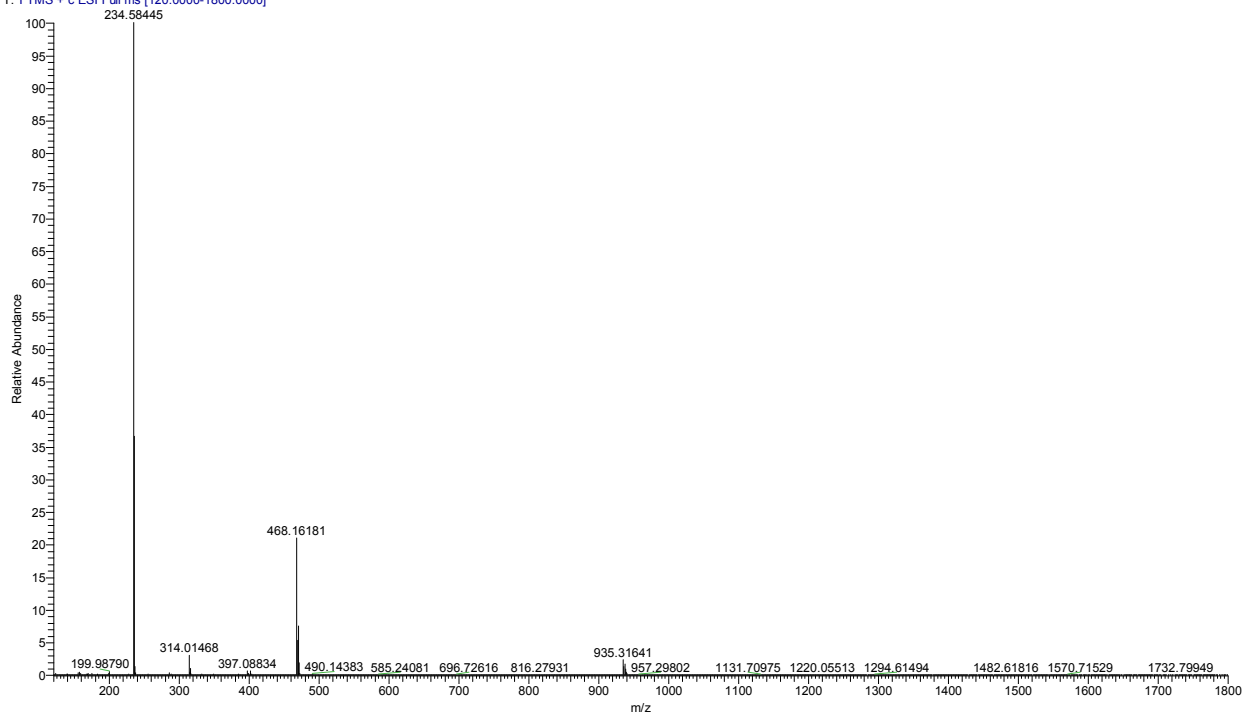

**(4-((4-(5-Phenylthiophen-2-yl)pyrimidin-2-yl)amino)phenyl)(4-(pyrrolidin-1-yl)piperidin-1-yl)methanone (18k)**

K23 #886-956 RT: 3.83-4.13 AV: 71 NL: 2.75E9  
T: FTMS + c ESI Full ms [120.0000-1800.0000]

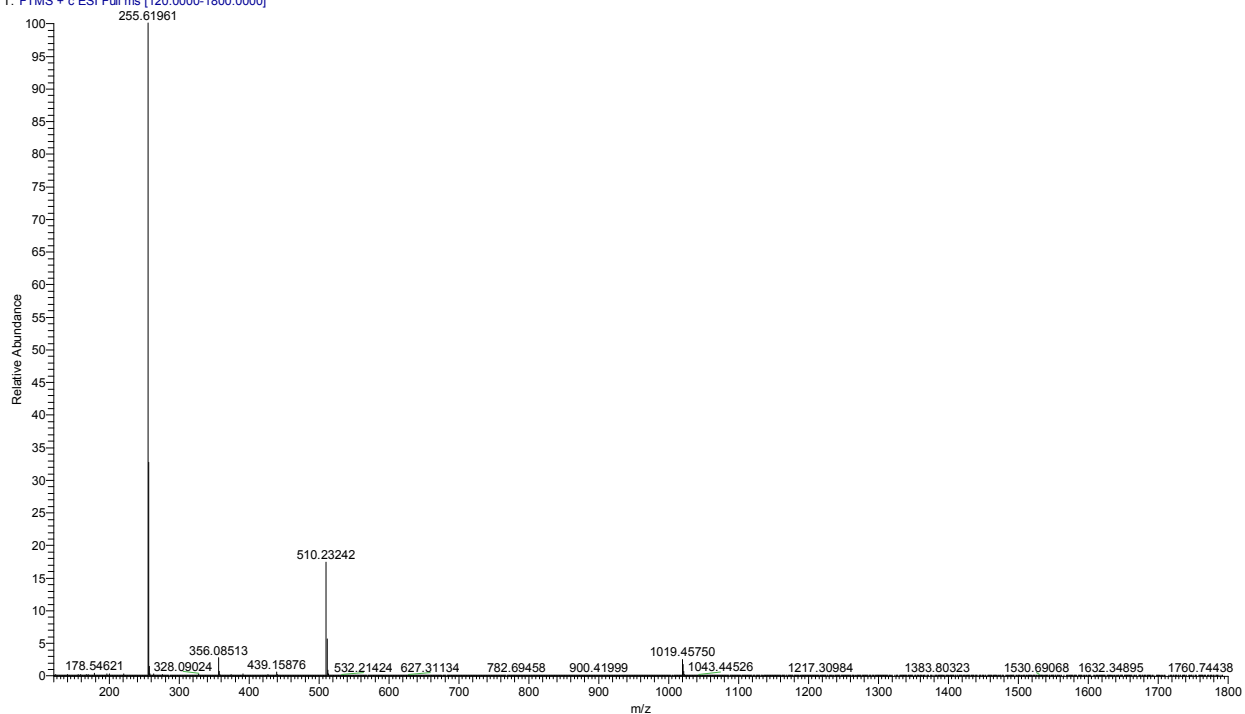

**4-((4-(5-(Hydroxymethyl)thiophen-2-yl)pyrimidin-2-yl)amino)phenyl)(4-(pyrrolidin-1-yl)piperidin-1-yl)methanone (18l)**

KG-37 #627-664 RT: 2.71-2.87 AV: 38 NL: 1.78E8  
T: FTMS + c ESI Full ms [200.0000-2000.0000]

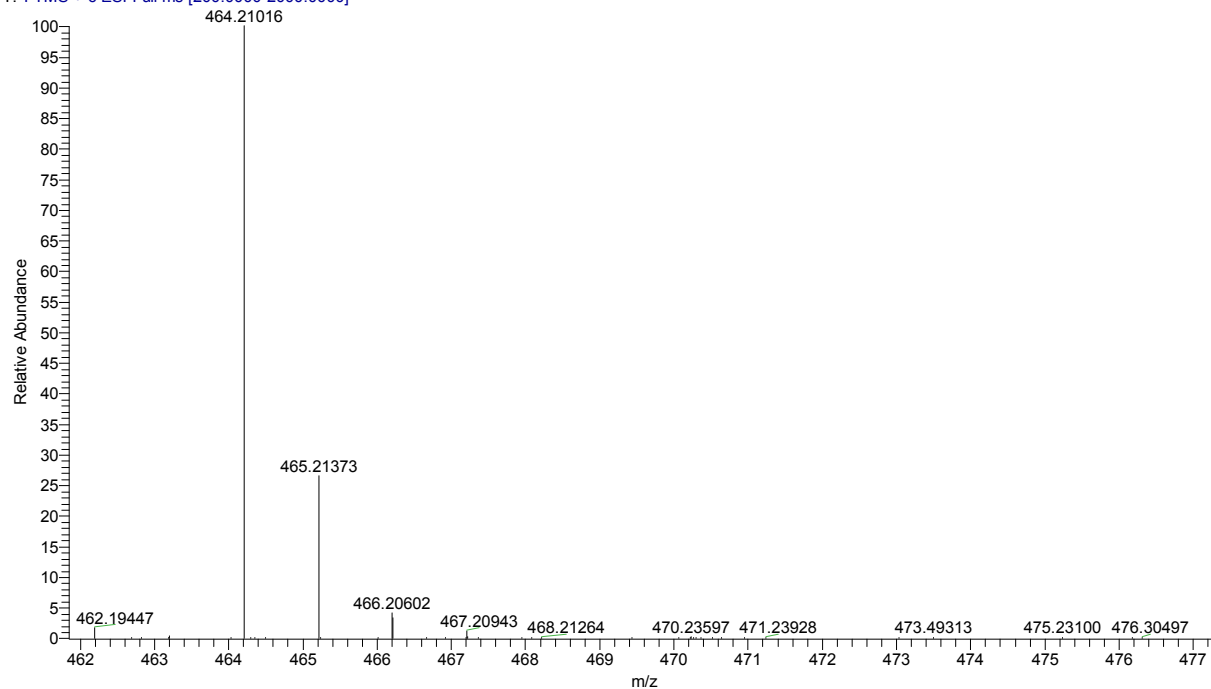

**4-(Pyrrolidin-1-yl)piperidin-1-yl)(4-((4-(5-((2,2-trifluoroethoxy)methyl)thiophen-2-yl)pyrimidin-2-yl)amino)phenyl)methanone (18m)**

K29 #824-901 RT: 3.56-3.89 AV: 78 NL: 1.68E8  
T: FTMS + c ESI Full ms [120.0000-1800.0000]

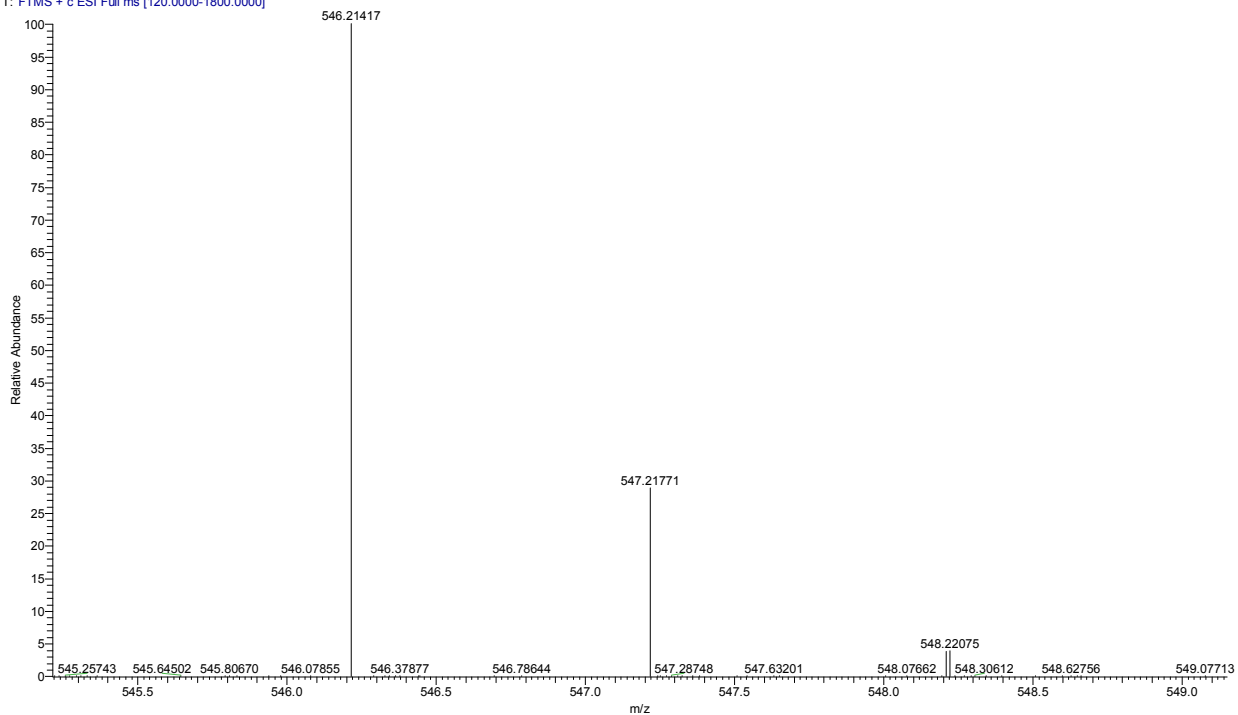

**(4-((4-(Benzo[b]thiophen-2-yl)-5-methylpyrimidin-2-yl)amino)phenyl)(4-(pyrrolidin-1-yl)piperidin-1-yl)methanone (18n)**

K15 #876-941 RT: 3.79-4.07 AV: 66 NL: 6.21E8  
T: FTMS + c ESI Full ms [120.0000-1800.0000]

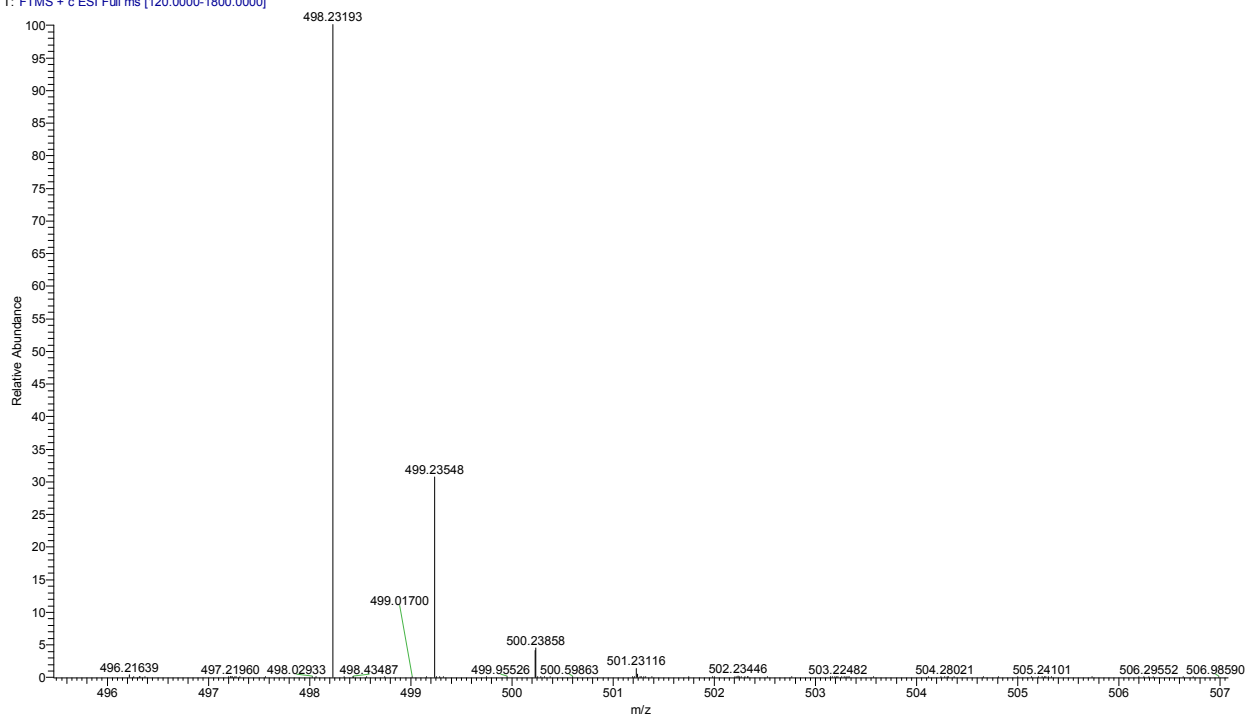

**(4-((4-(Benzo[b]thiophen-2-yl)-5-cyclopropylpyrimidin-2-yl)amino)phenyl)(4-(pyrrolidin-1-yl)piperidin-1-yl)methanone (18o)**

K16 #928-993 RT: 4.01-4.29 AV: 66 NL: 1.73E8  
T: FTMS + c ESI Full ms [120.0000-1800.0000]

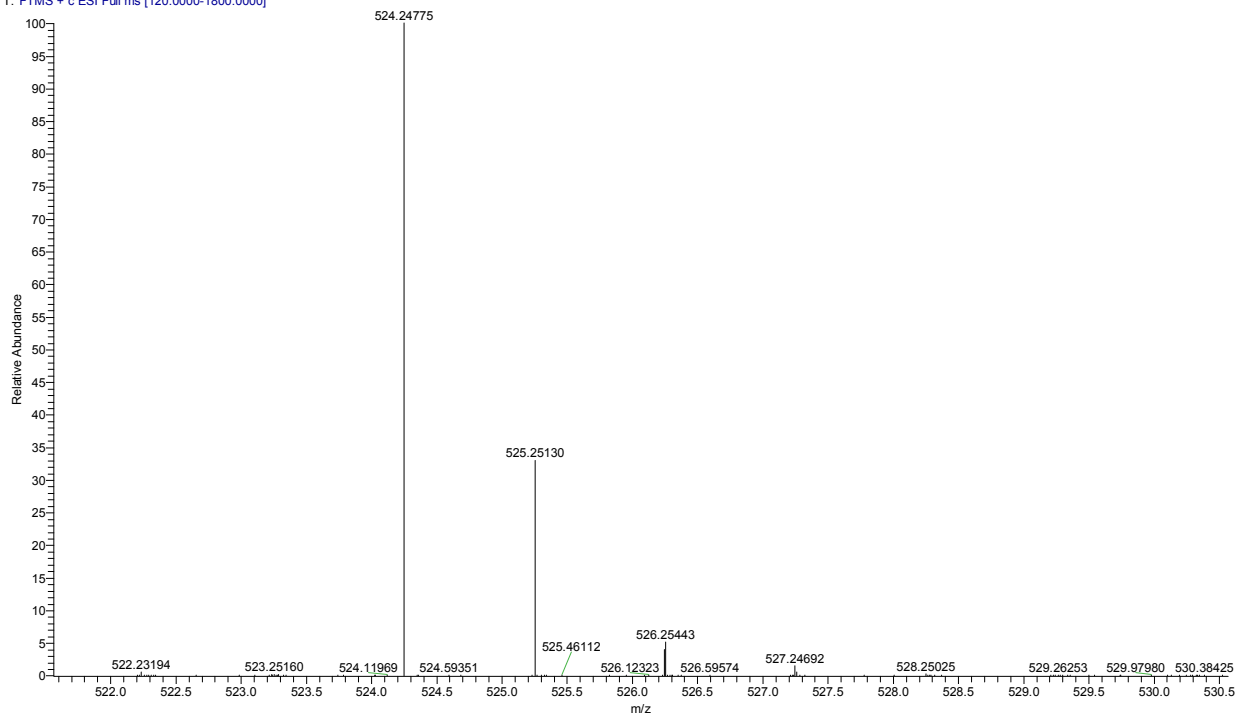

**4-((4-(Benzo[b]thiophen-2-yl)-5-methoxypyrimidin-2-yl)amino)phenyl)(4-(pyrrolidin-1-yl)piperidin-1-yl)methanone (18p)**

K31 #889-938 RT: 3.84-4.05 AV: 50 NL: 1.18E8  
T: FTMS + c ESI Full ms [120.0000-1800.0000]

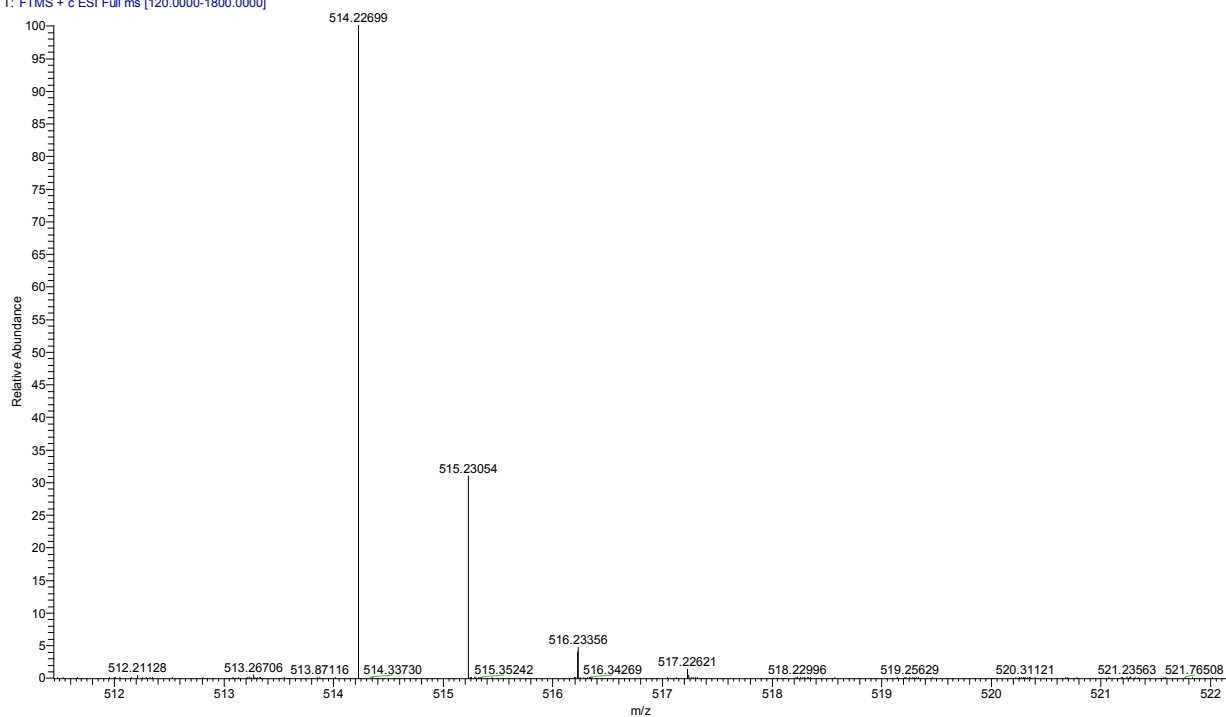

**4-((4-(Benzo[b]thiophen-2-yl)-5-fluoropyrimidin-2-yl)amino)phenyl)(4-(pyrrolidin-1-yl)piperidin-1-yl)methanone (18q)**

K19 #901-957 RT: 3.89-4.14 AV: 57 NL: 4.64E8  
T: FTMS + c ESI Full ms [120.0000-1800.0000]

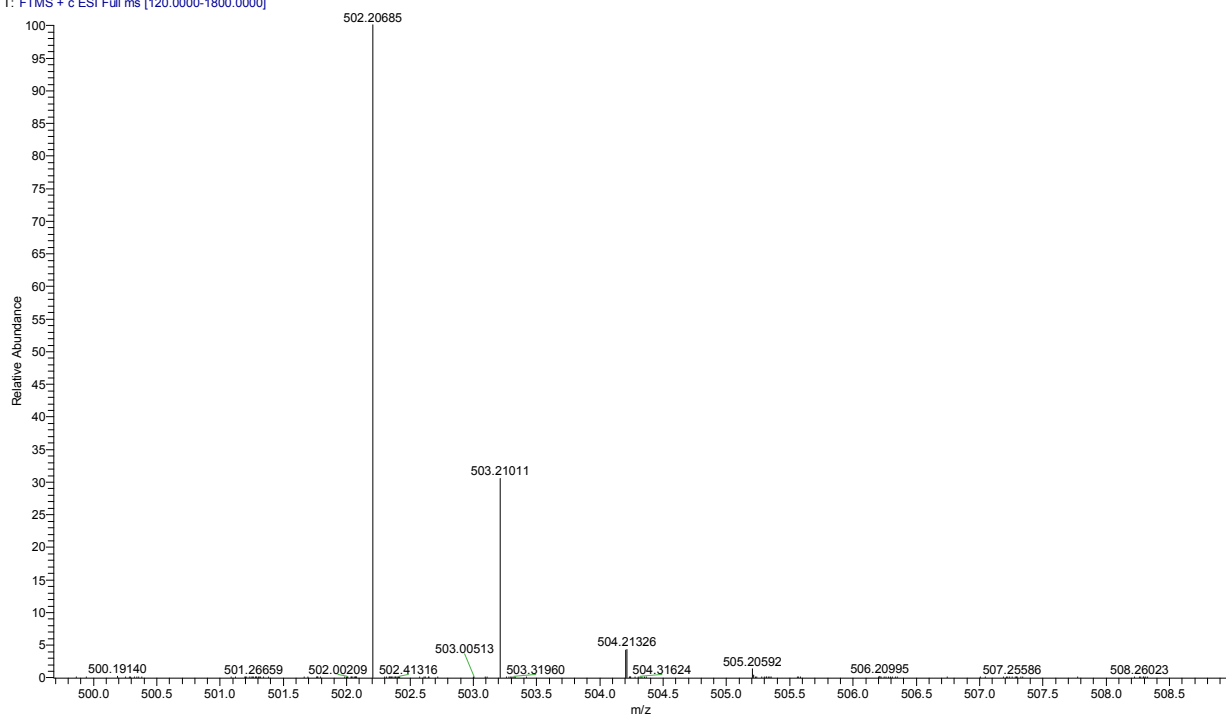

**(4-((4-(Benzo[b]thiophen-2-yl)-5-chloropyrimidin-2-yl)amino)phenyl)(4-(pyrrolidin-1-yl)piperidin-1-yl)methanone (18r)**

K20 #938-989 RT: 4.05-4.27 AV: 52 NL: 2.49E8  
T: FTMS + c ESI Full ms [120.0000-1800.0000]

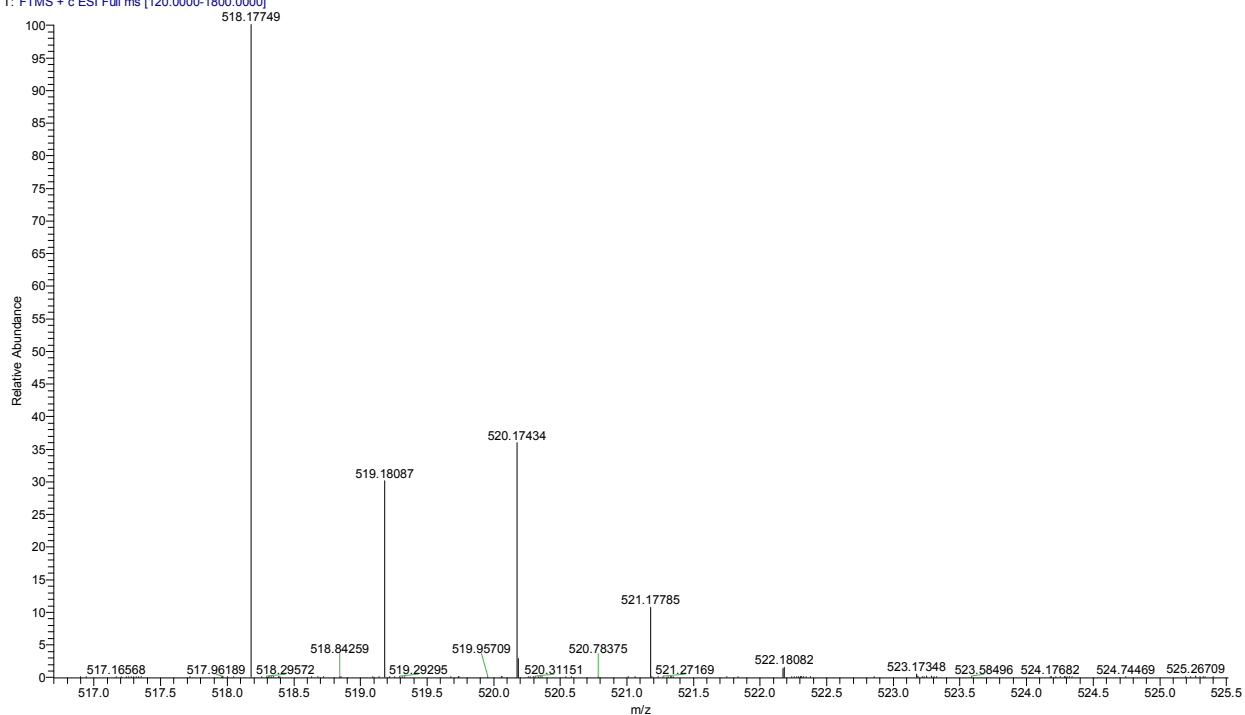

**(4-((4-(Benzo[b]thiophen-2-yl)-5-bromopyrimidin-2-yl)amino)phenyl)(4-(pyrrolidin-1-yl)piperidin-1-yl)methanone (18s)**

K057 #944-1004 RT: 4.08-4.34 AV: 61 NL: 4.32E8  
T: FTMS + c ESI Full ms [120.0000-1800.0000]

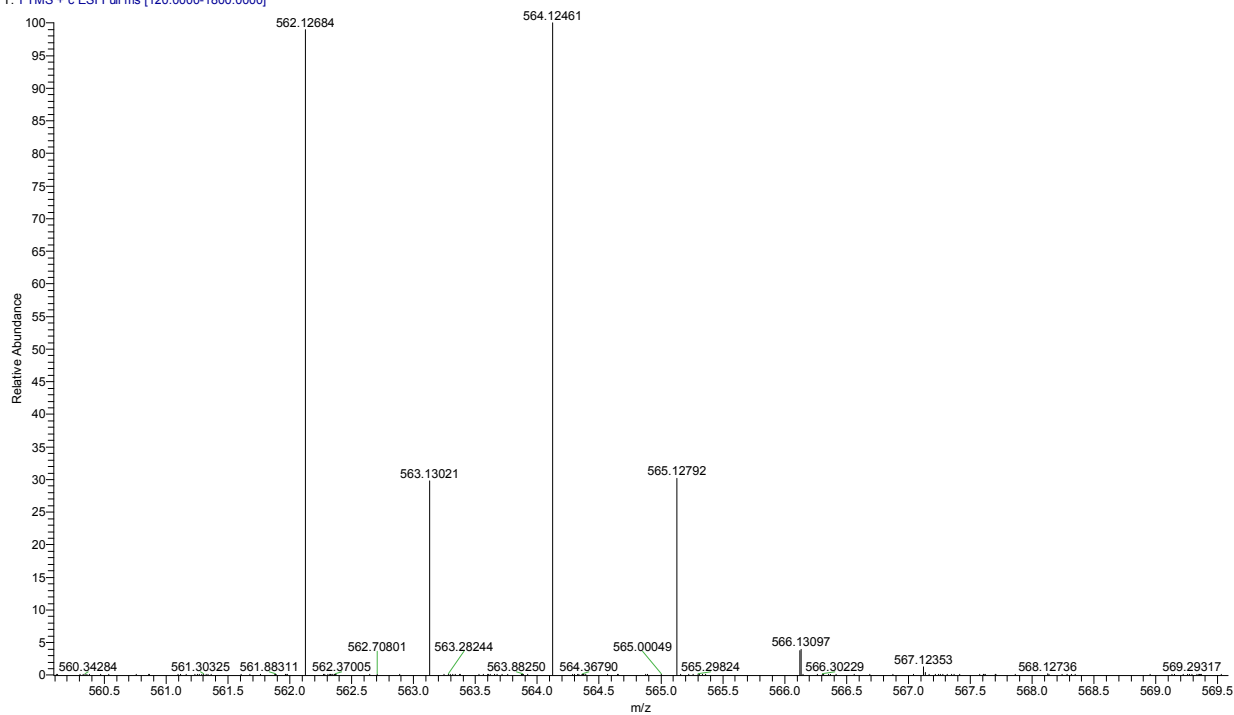

**4-(Benzo[b]thiophen-2-yl)-2-((4-(4-(pyrrolidin-1-yl)piperidine-1-carbonyl)phenyl)amino)pyrimidine-5-carbonitrile (18t)**

KG-61 #857-910 RT: 3.70-3.93 AV: 54 NL: 2.80E8  
T: FTMS + c ESI Full ms [200.0000-2000.0000]

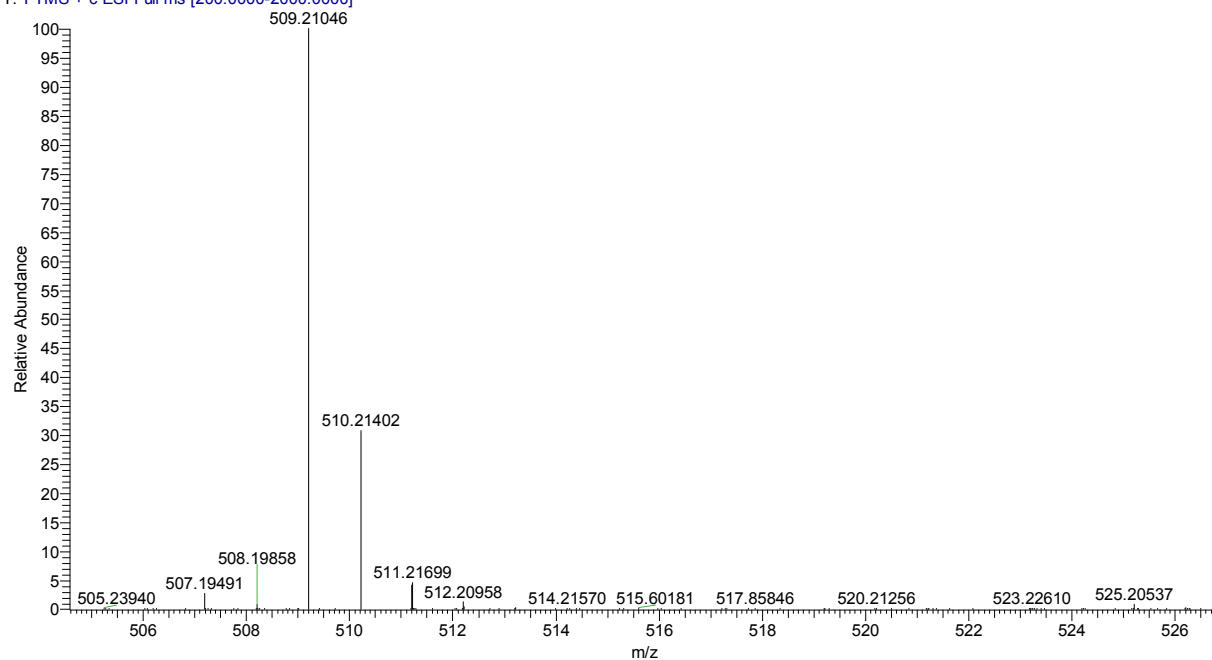

**(4-((5-Methyl-4-(5-methylthiophen-2-yl)pyrimidin-2-yl)amino)phenyl)(4-(pyrrolidin-1-yl)piperidin-1-yl)methanone (23a)**

KG52 #788-852 RT: 3.40-3.68 AV: 65 NL: 3.42E8  
T: FTMS + c ESI Full ms [150.0000-2000.0000]

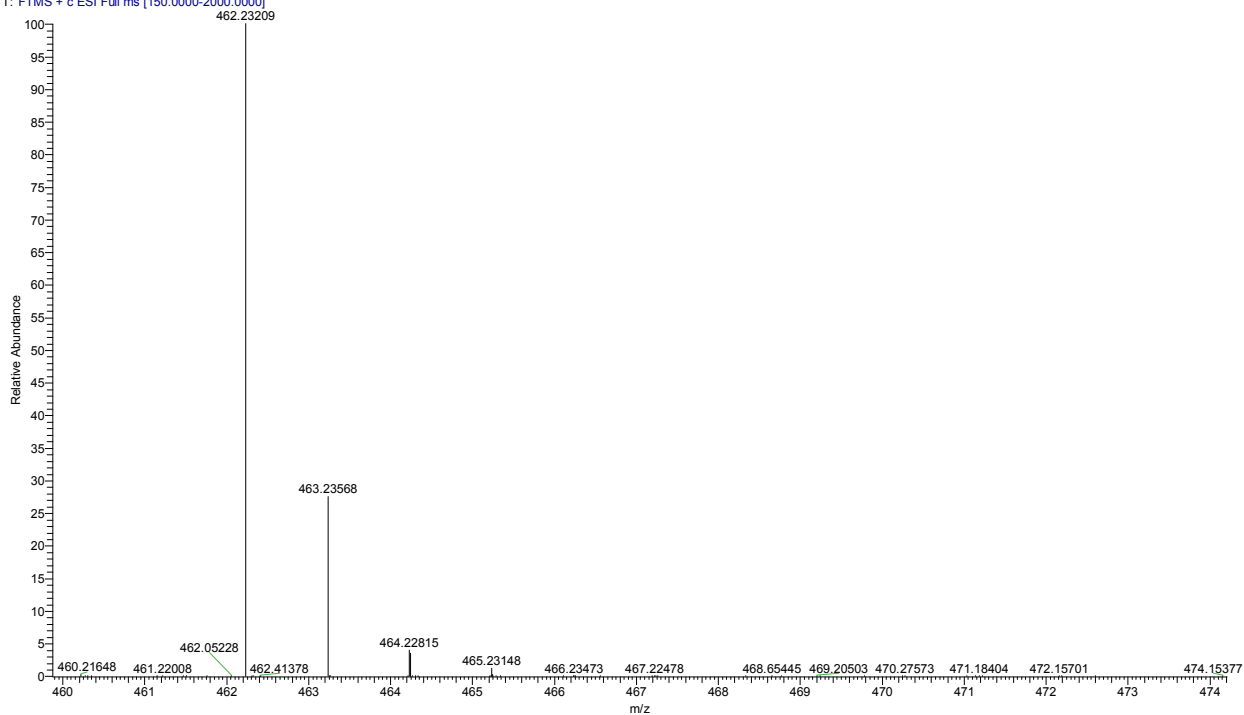

***4-((5-Chloro-4-(5-methylthiophen-2-yl)pyrimidin-2-yl)amino)phenyl)(4-(pyrrolidin-1-yl)piperidin-1-yl)methanone (23b)***

KG50 #854-914 RT: 3.69-3.95 AV: 61 NL: 1.17E9  
T: FTMS + c ESI Full ms [150.0000-2000.0000]

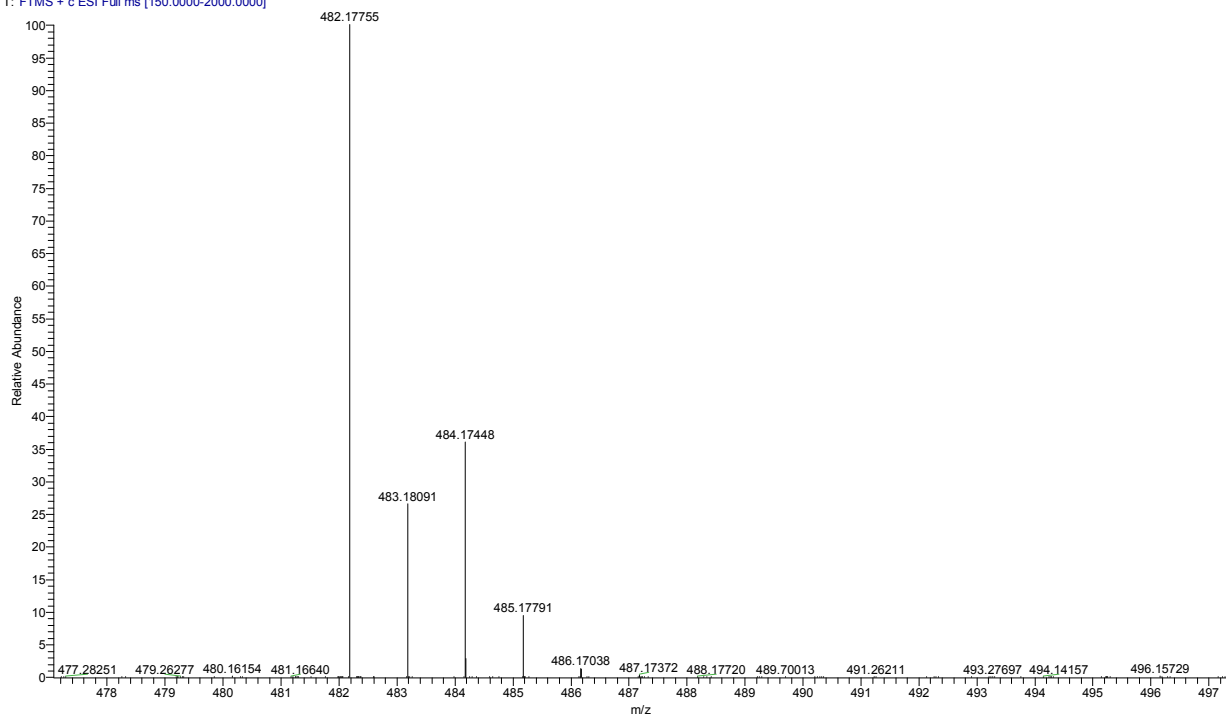

***4-((4-(5-Chlorothiophen-2-yl)-5-methylpyrimidin-2-yl)amino)phenyl)(4-(pyrrolidin-1-yl)piperidin-1-yl)methanone (23c)***

KG53 #826-881 RT: 3.57-3.81 AV: 56 NL: 2.78E8  
T: FTMS + c ESI Full ms [150.0000-2000.0000]

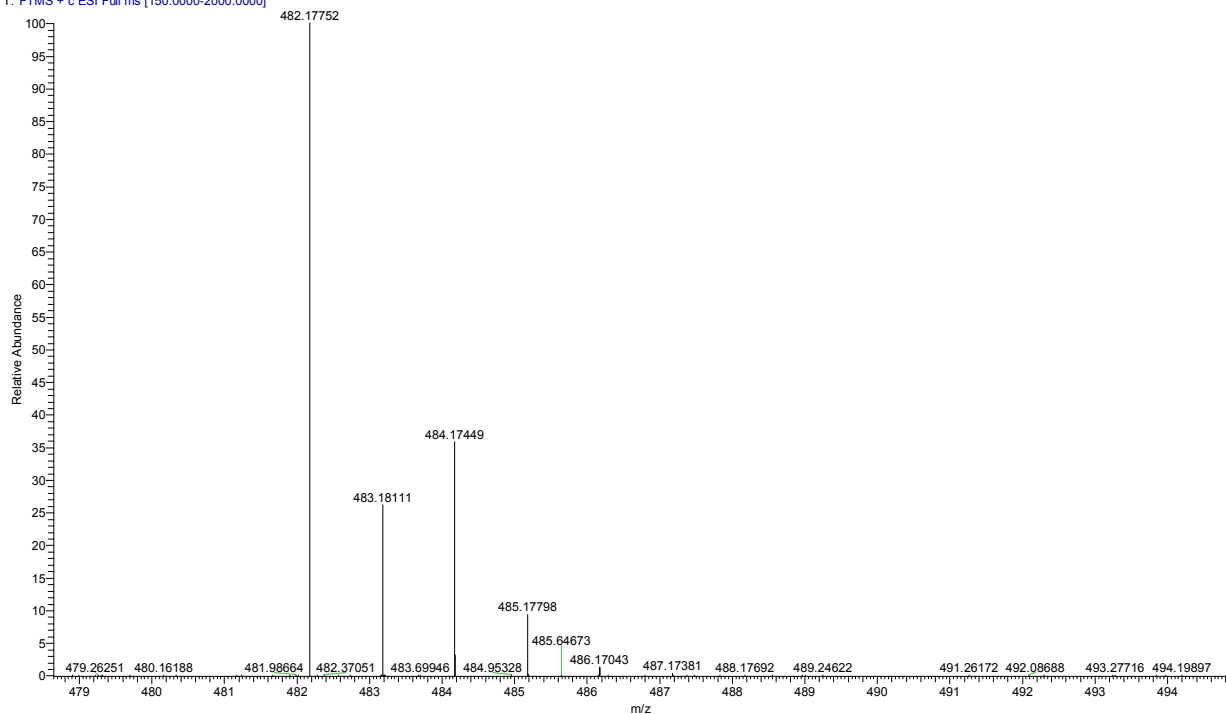

**4-((5-Chloro-4-(5-chlorothiophen-2-yl)pyrimidin-2-yl)amino)phenyl)(4-(pyrrolidin-1-yl)piperidin-1-yl)methanone (23d)**

KG51 #883-942 RT: 3.82-4.07 AV: 60 NL: 9.31E8  
T: FTMS + c ESI Full ms [150.0000-2000.0000]

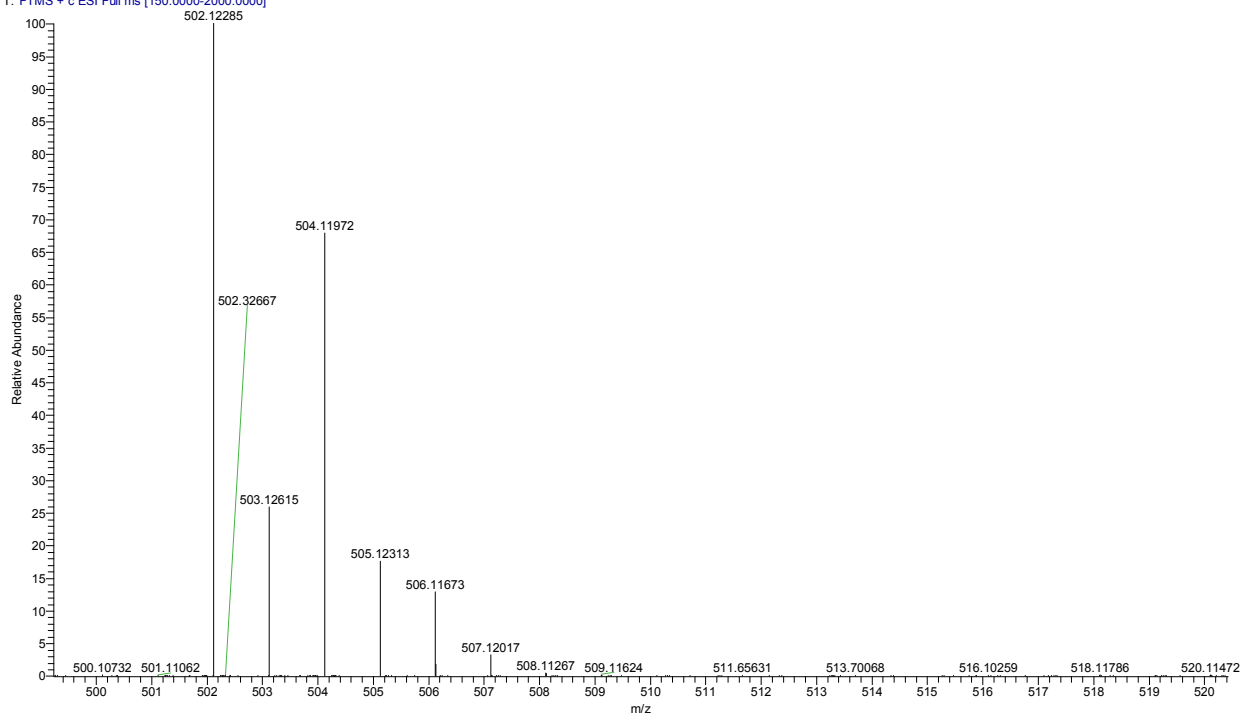

**4-((5-Chloro-4-(5-chlorothiophen-2-yl)pyrimidin-2-yl)amino)-N-(3-morpholinopropyl)benzamide (23e)**

KG70 #888-950 RT: 3.84-4.11 AV: 63 NL: 2.83E8  
T: FTMS + c ESI Full ms [150.0000-2000.0000]

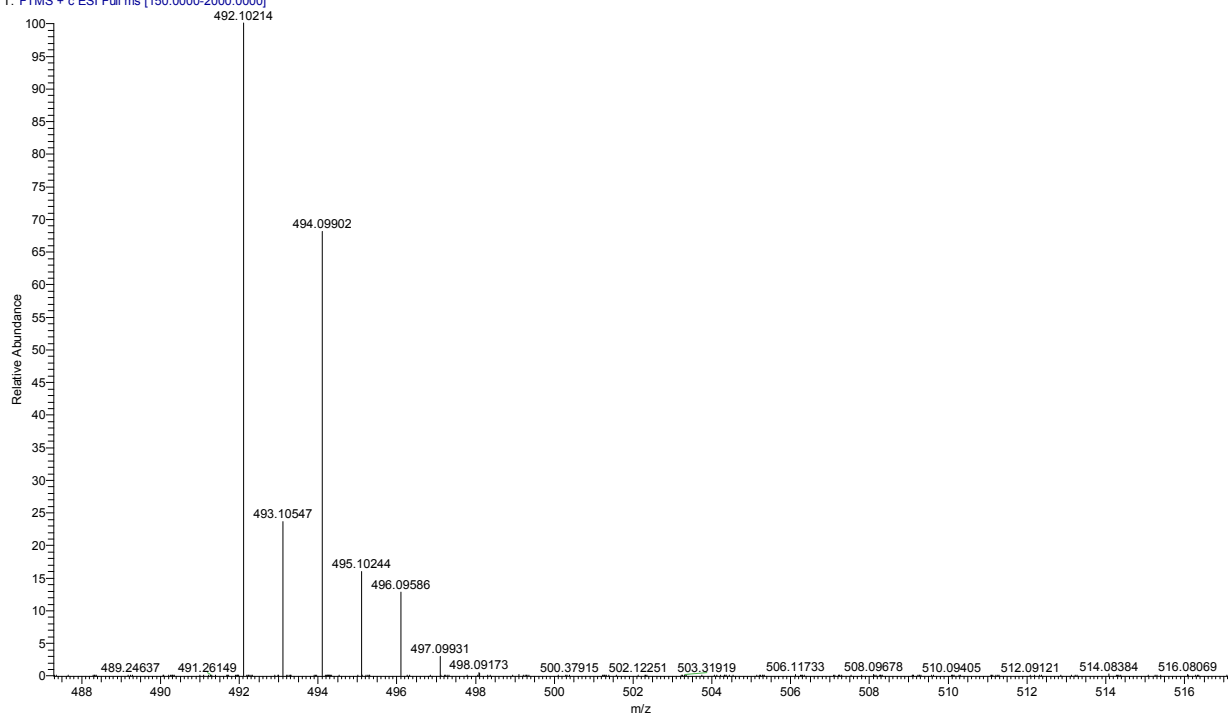



**4-((5-Chloro-4-(5-methylthiophen-2-yl)pyrimidin-2-yl)amino)-N-(3-morpholinopropyl)benzamide (23f)**

KG69 #858-945 RT: 3.71-4.08 AV: 88 NL: 7.24E8  
T: FTMS + c ESI Full ms [150.0000-2000.0000]

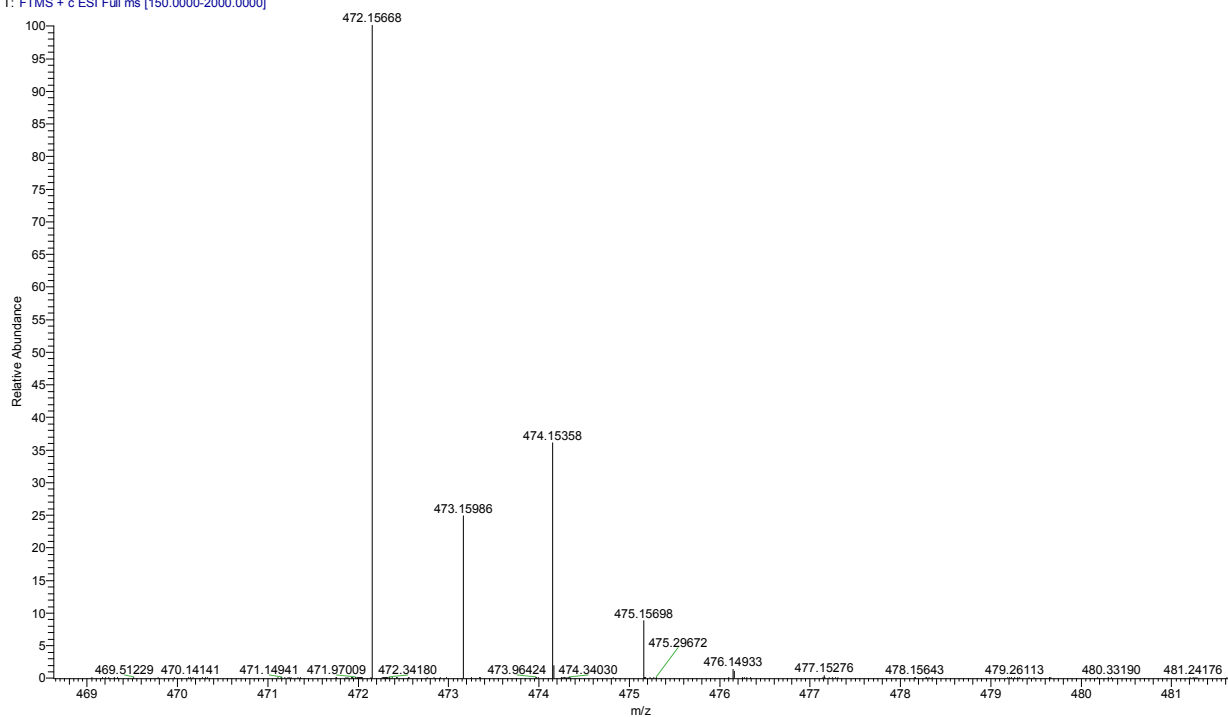

**4-((4-(5-Chlorothiophen-2-yl)-5-methylpyrimidin-2-yl)amino)-N-(3-morpholinopropyl)benzamide (23g)**

KG68 #823-884 RT: 3.56-3.82 AV: 62 NL: 4.97E8  
T: FTMS + c ESI Full ms [150.0000-2000.0000]

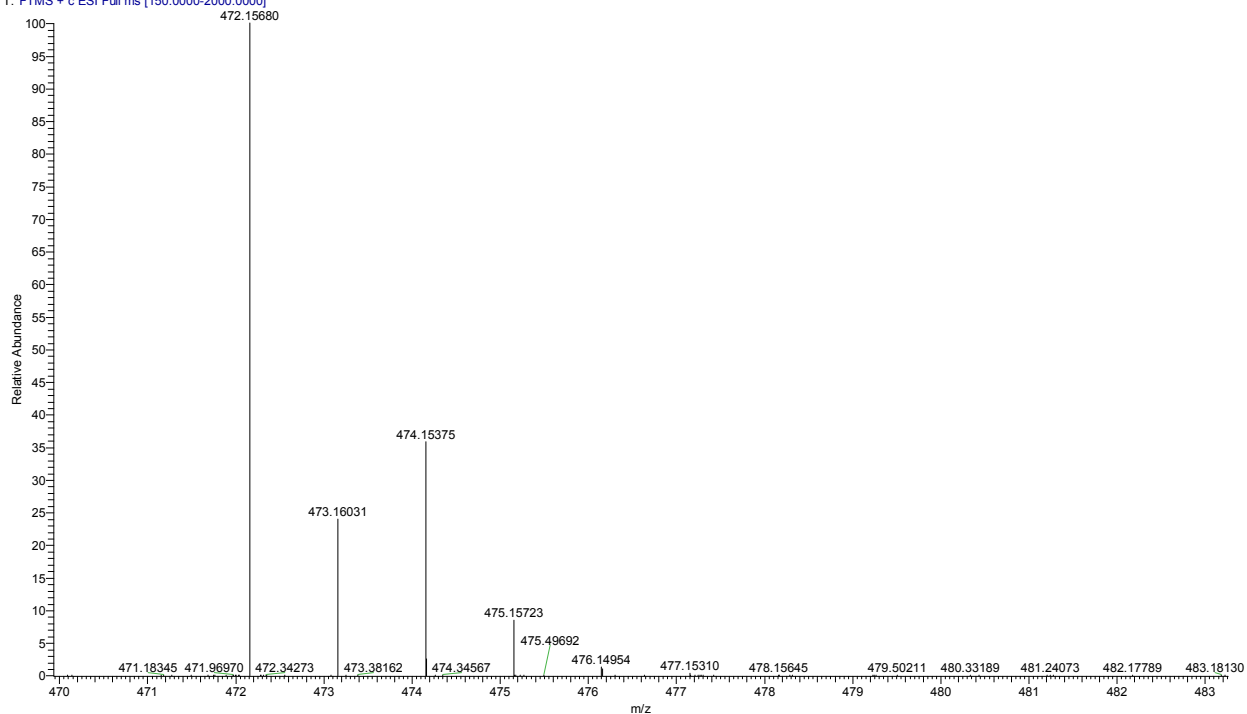

## HPLC traces of compounds submitted for biological screening

4a

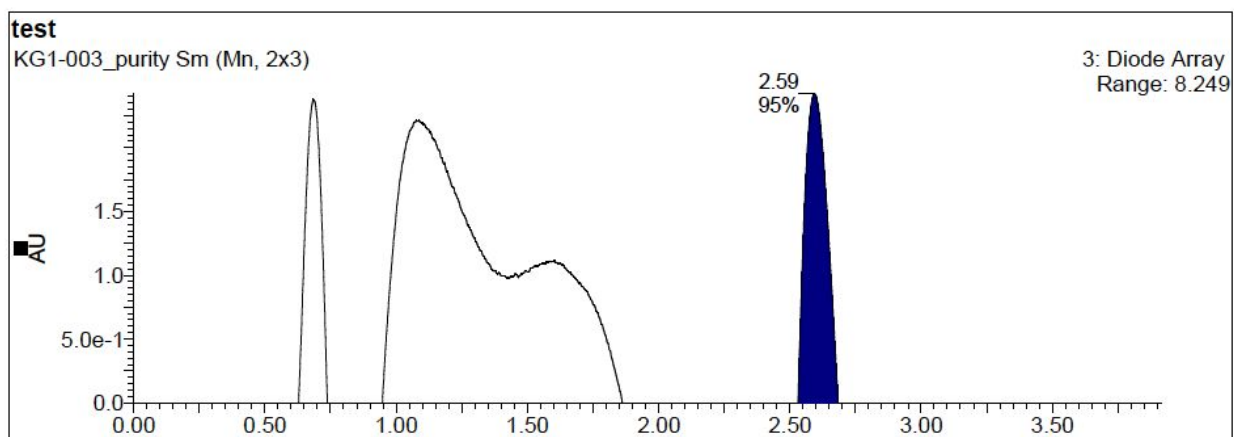

4b

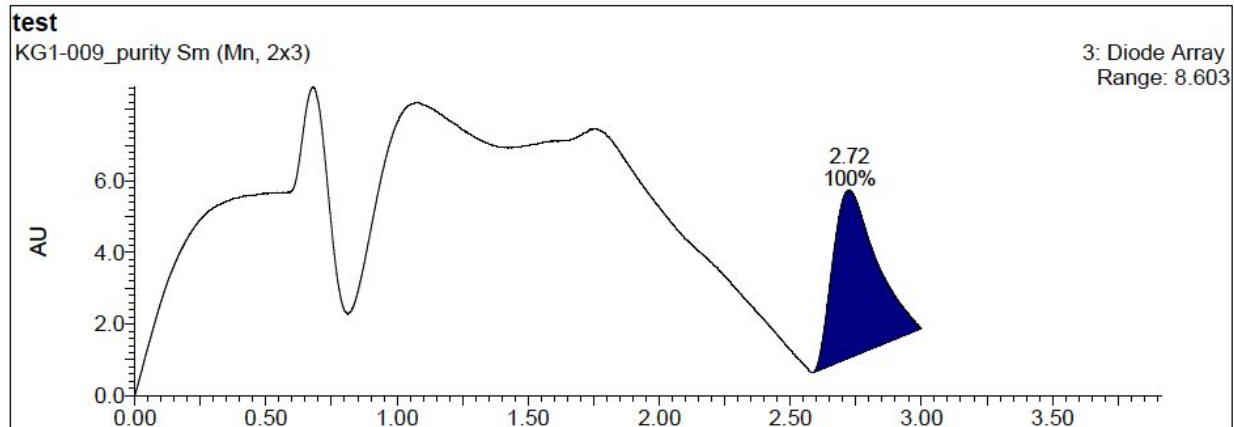

4c

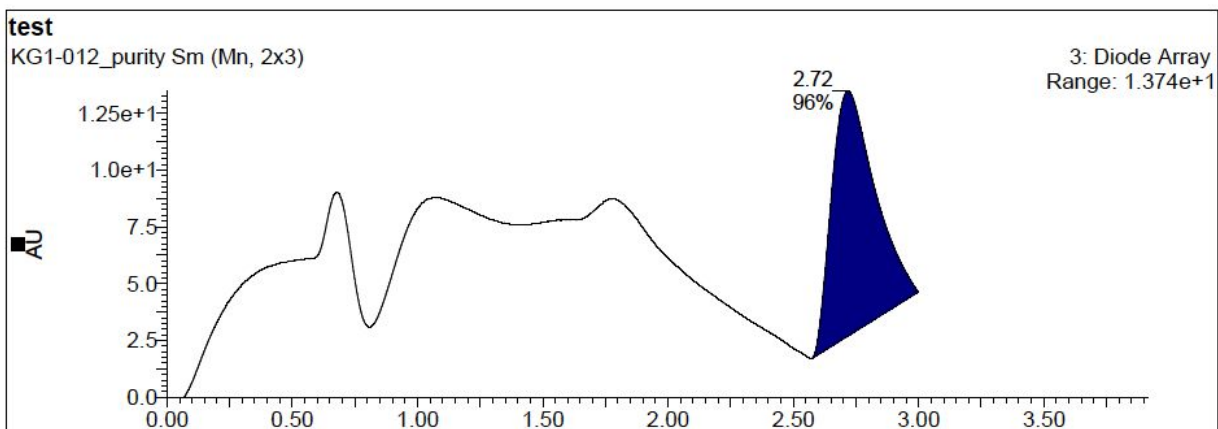

4d

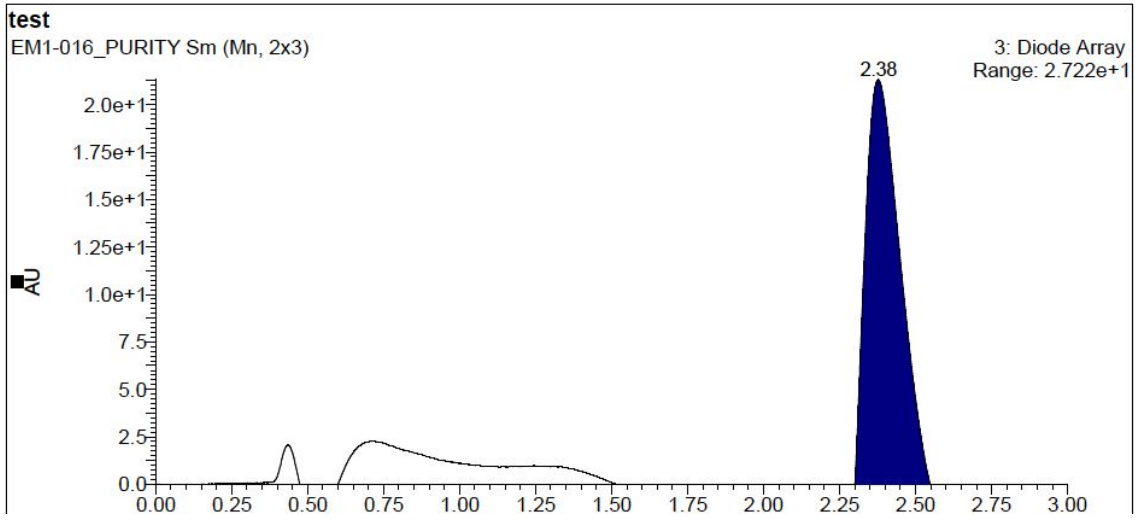

4e

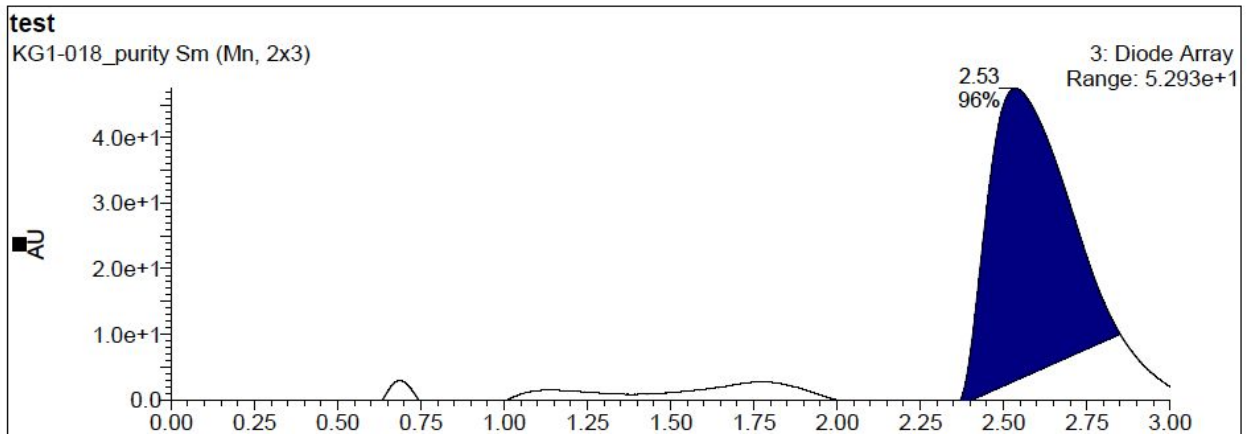

4f

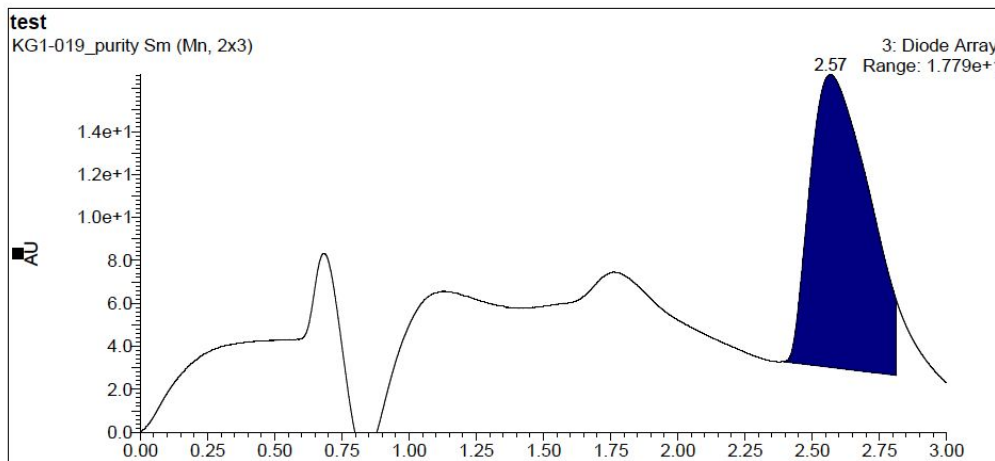

### 4g

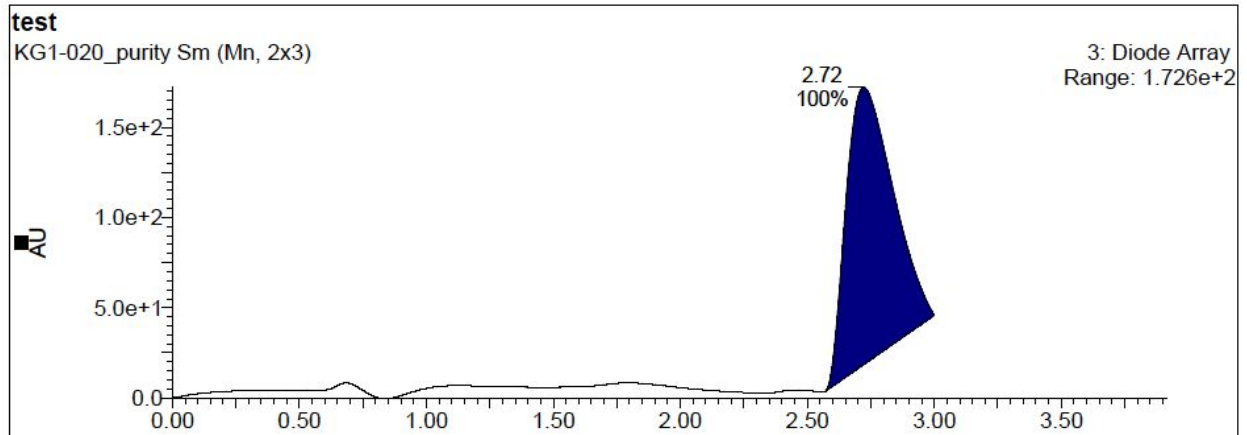

### 4h

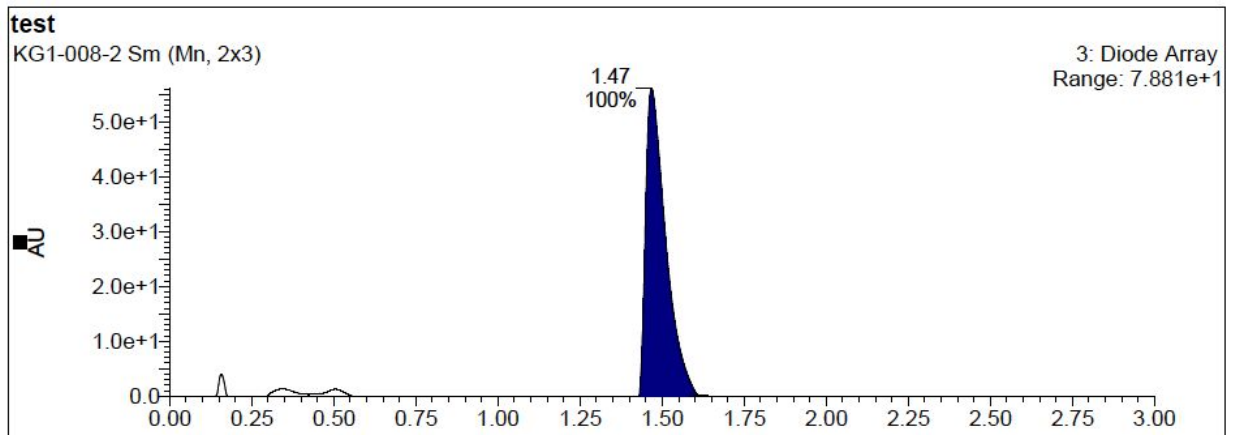

### 5

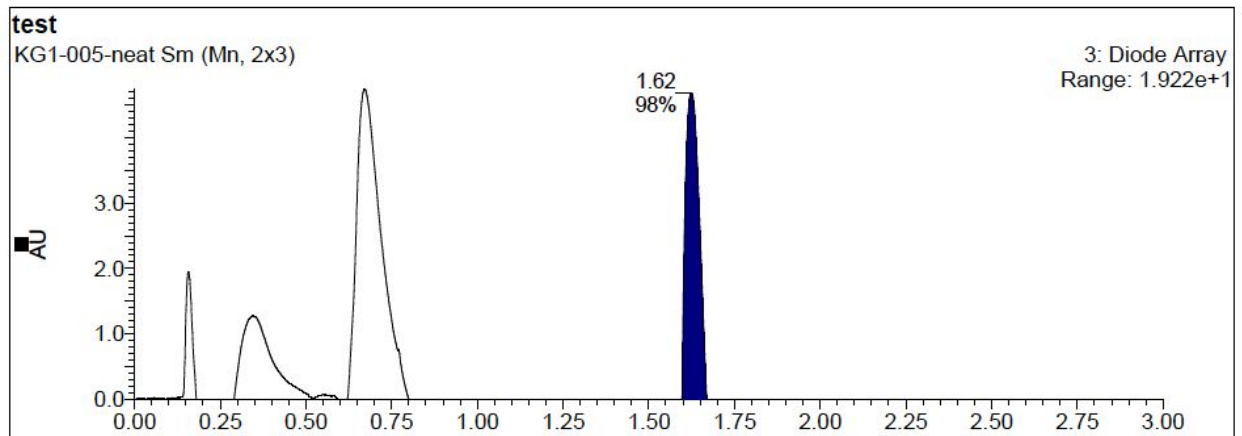

6

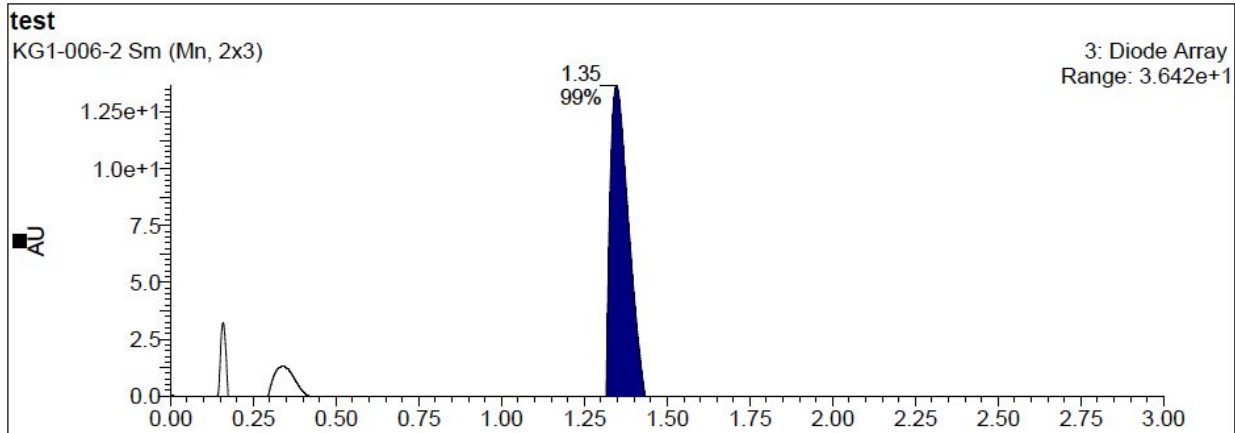

8a

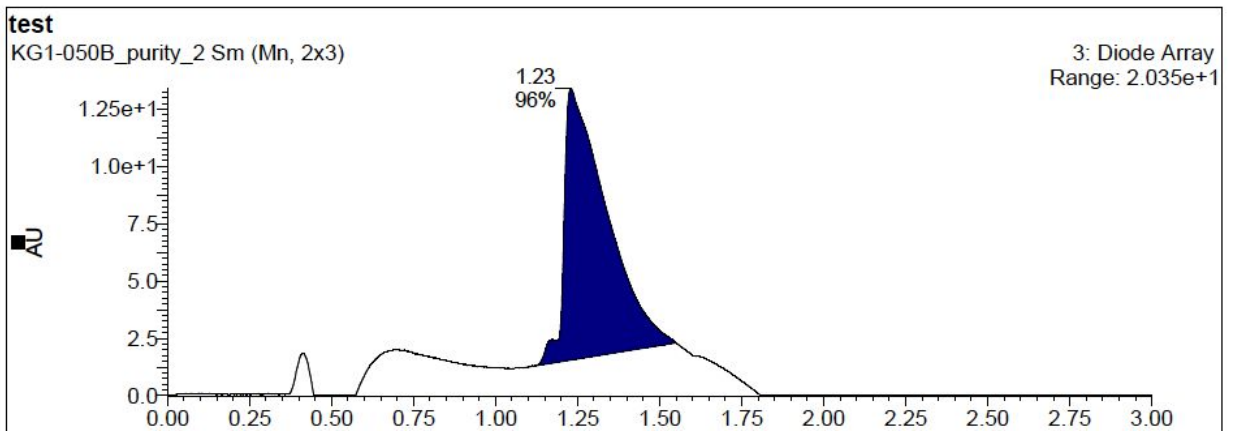

8b

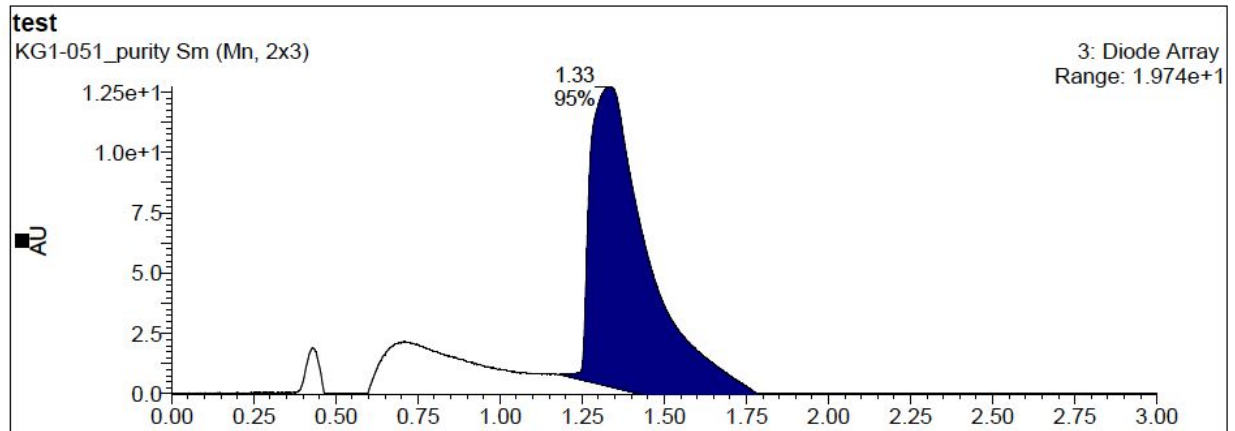

8c

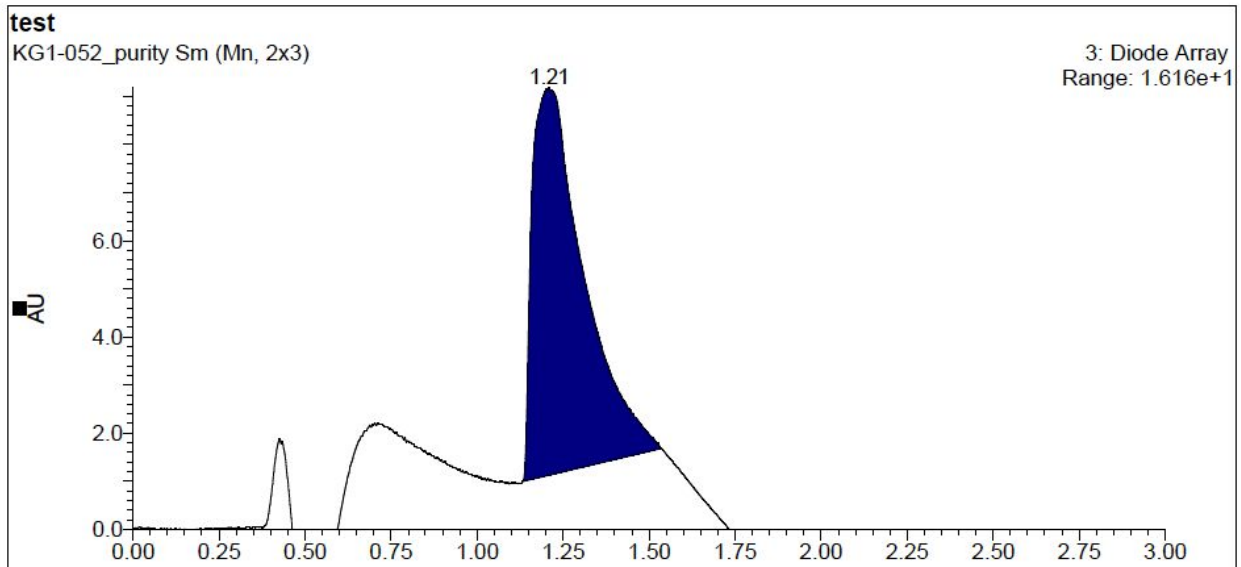

9a

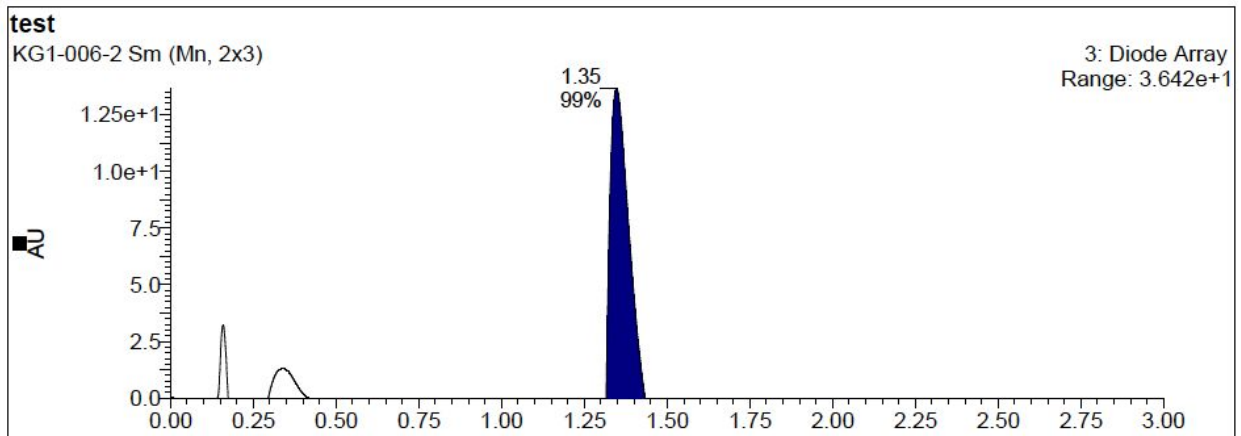

9b

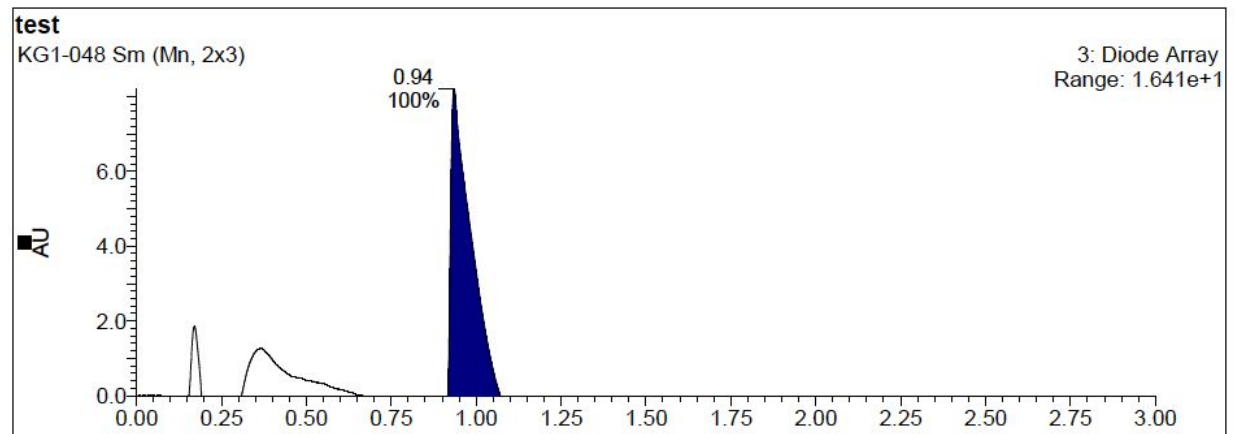

9c

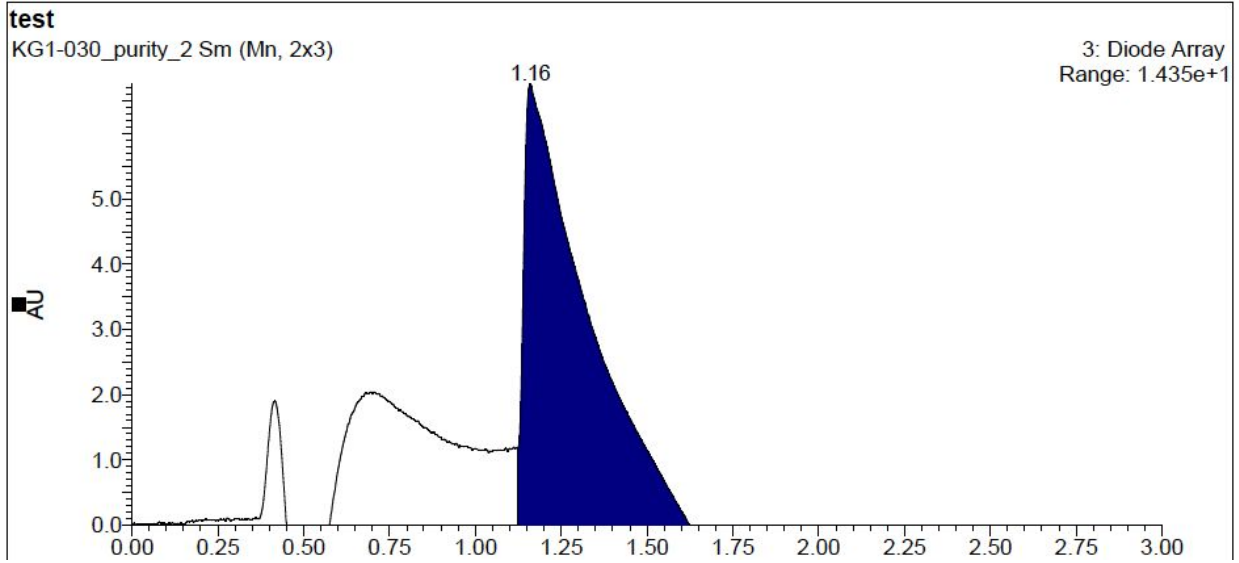

9d

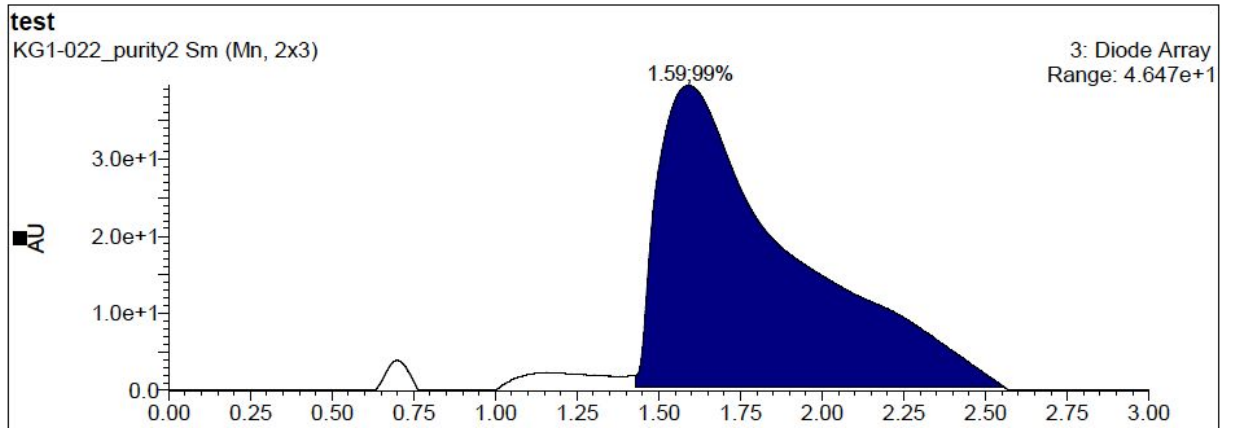

9e

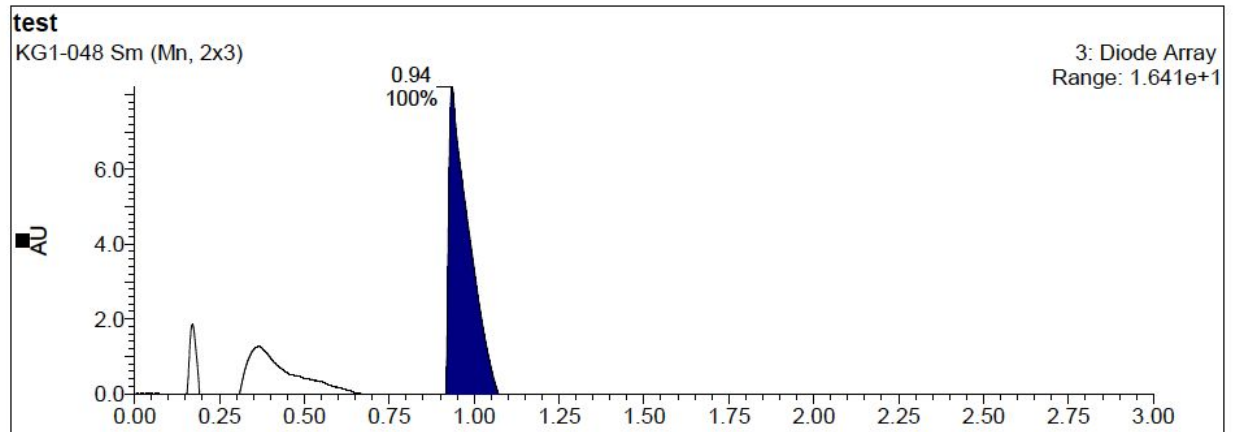

9f

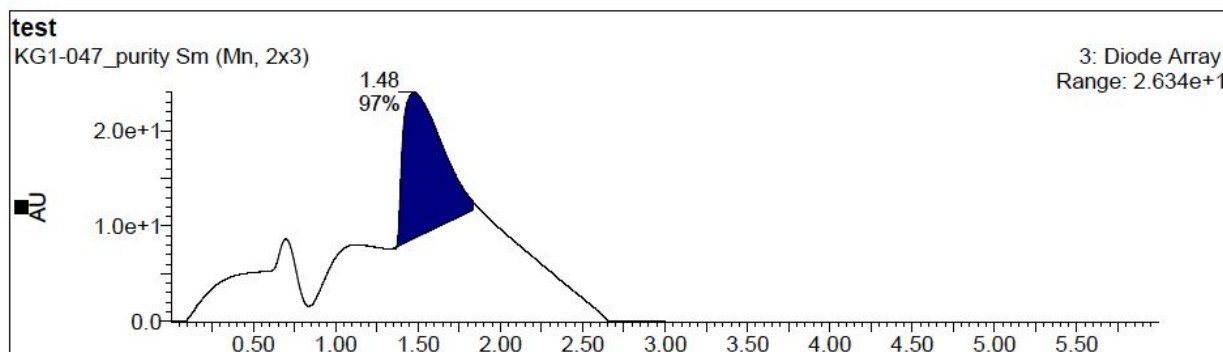

9g

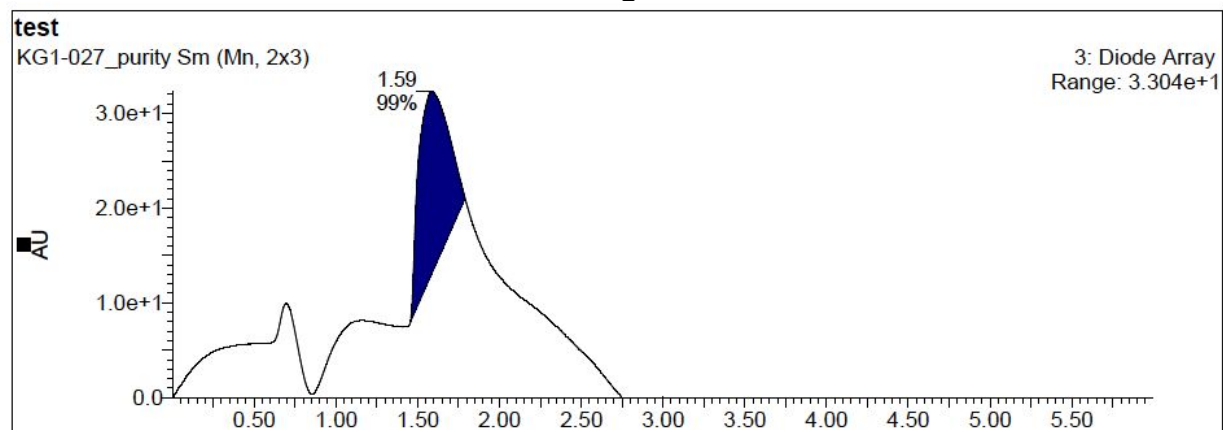

9h

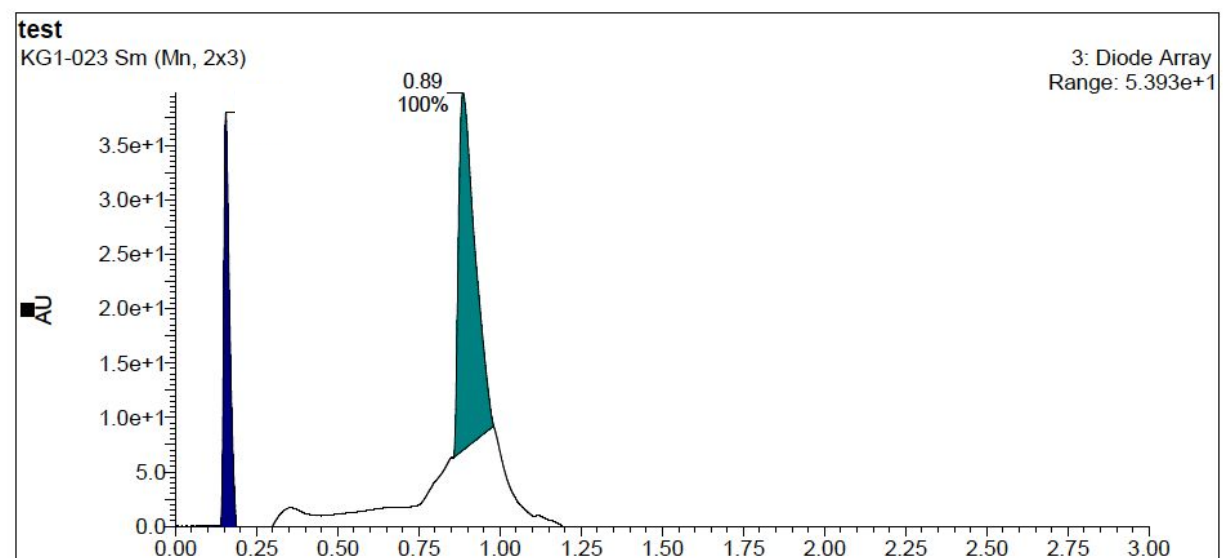



9i

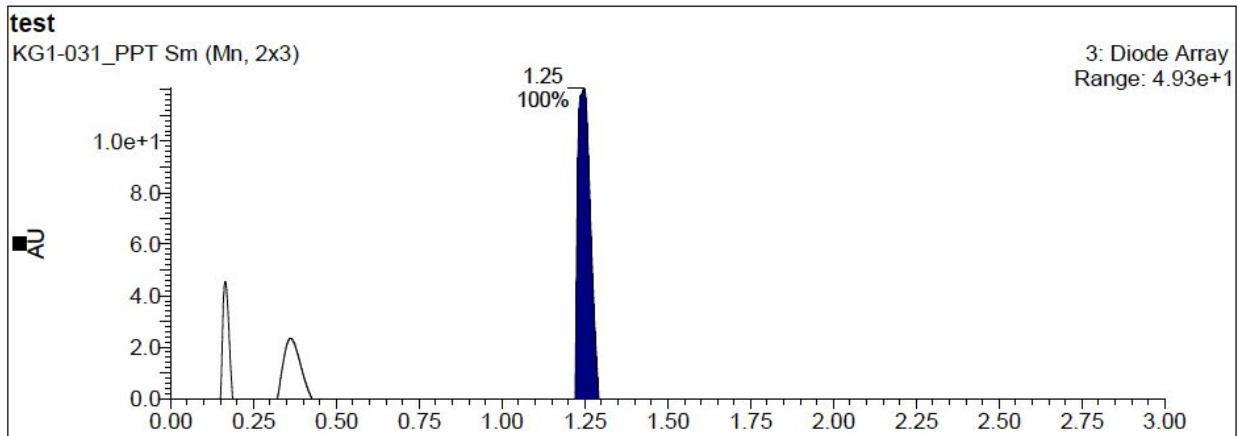

9j

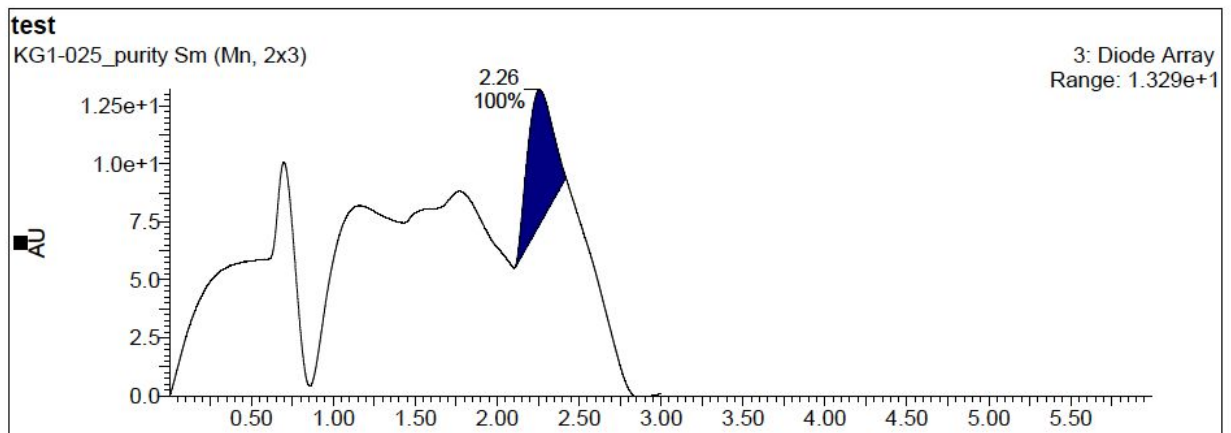

9k

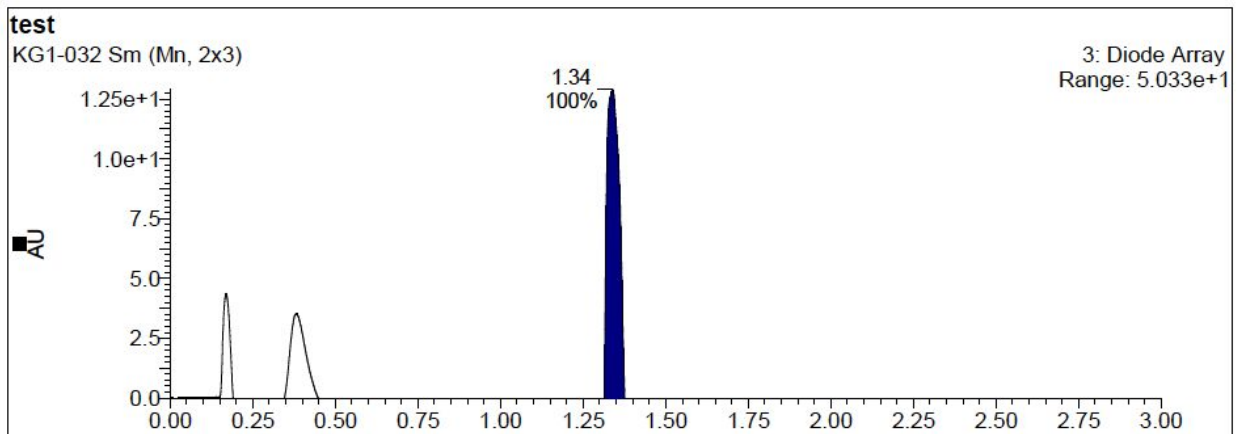

12

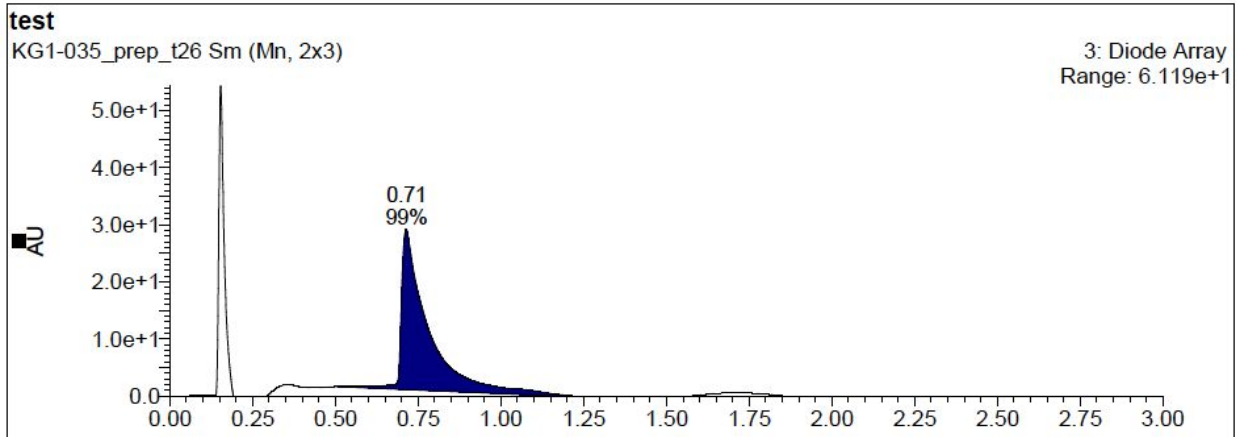

18a

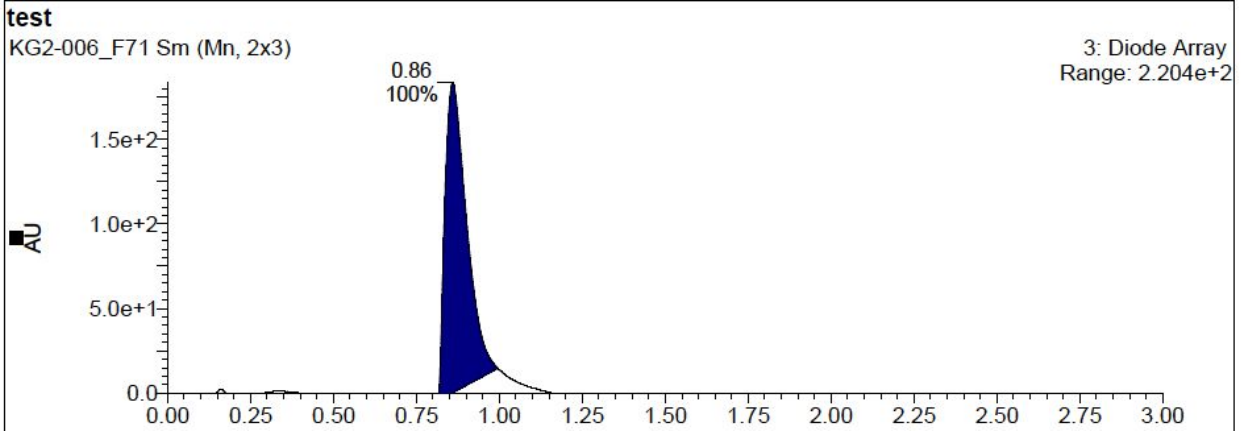

18b

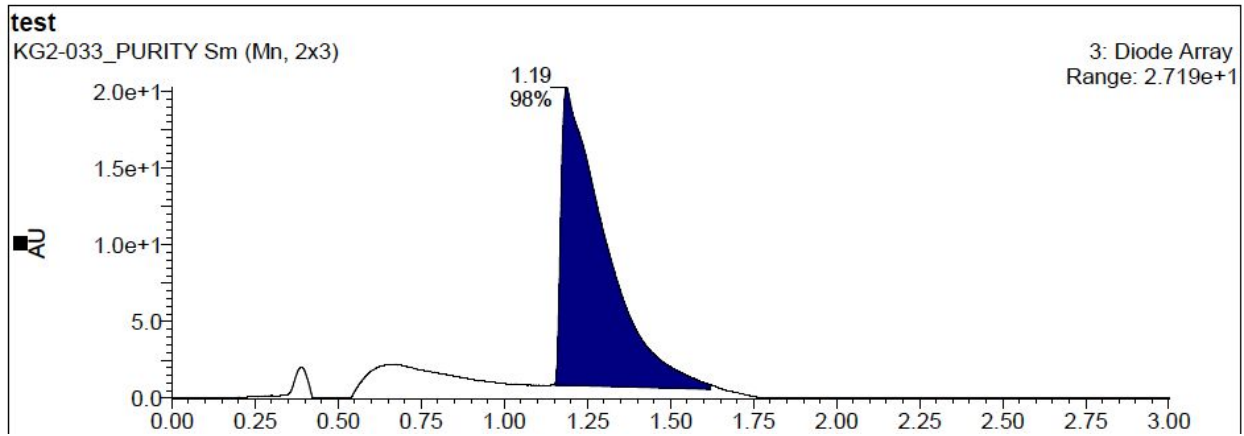

18c

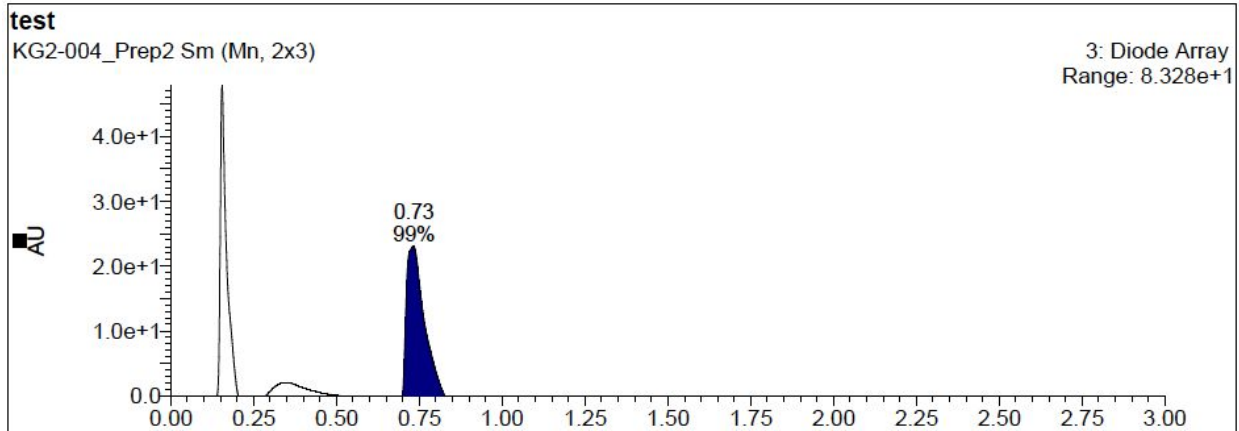

18d

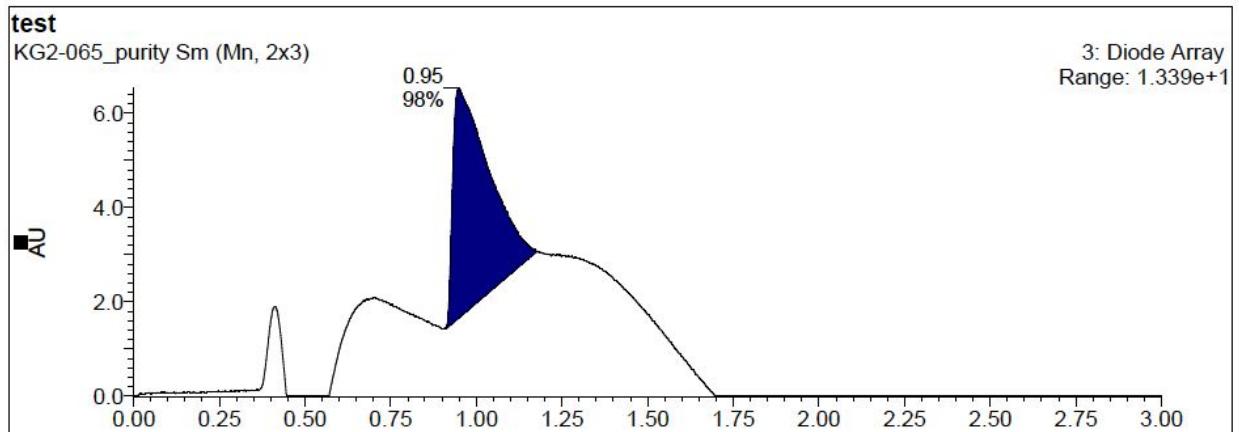

18e

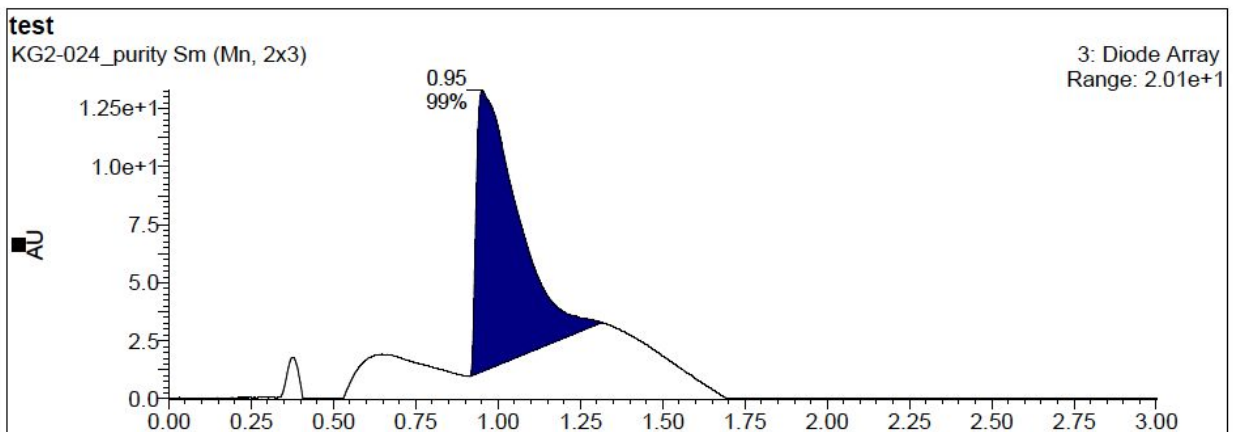

18f

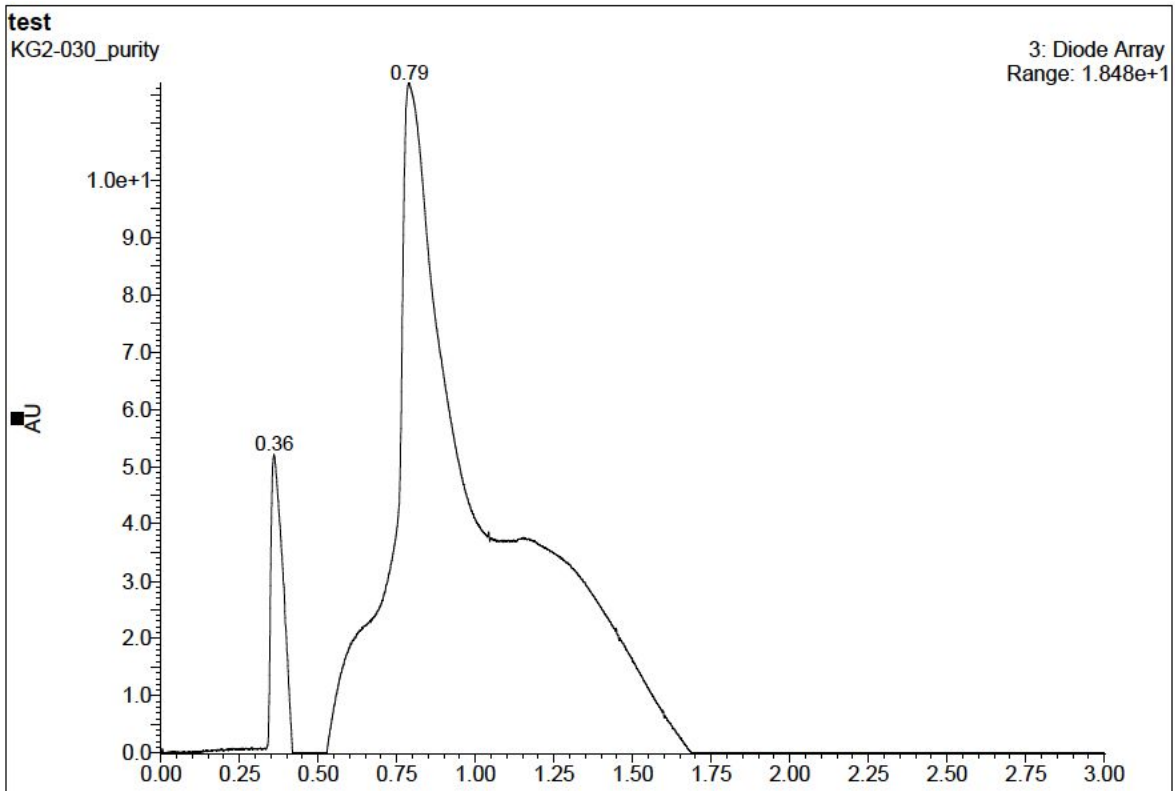

18g

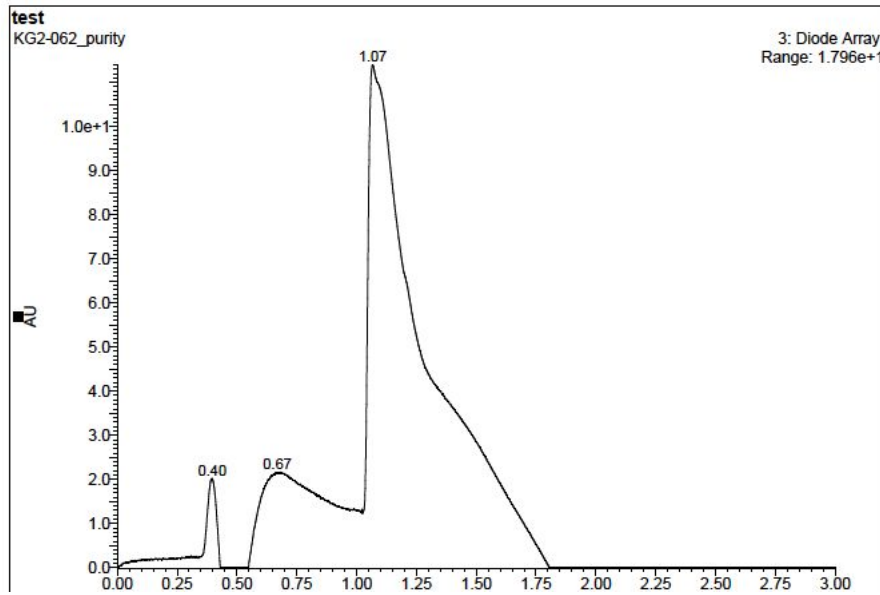

### 18h

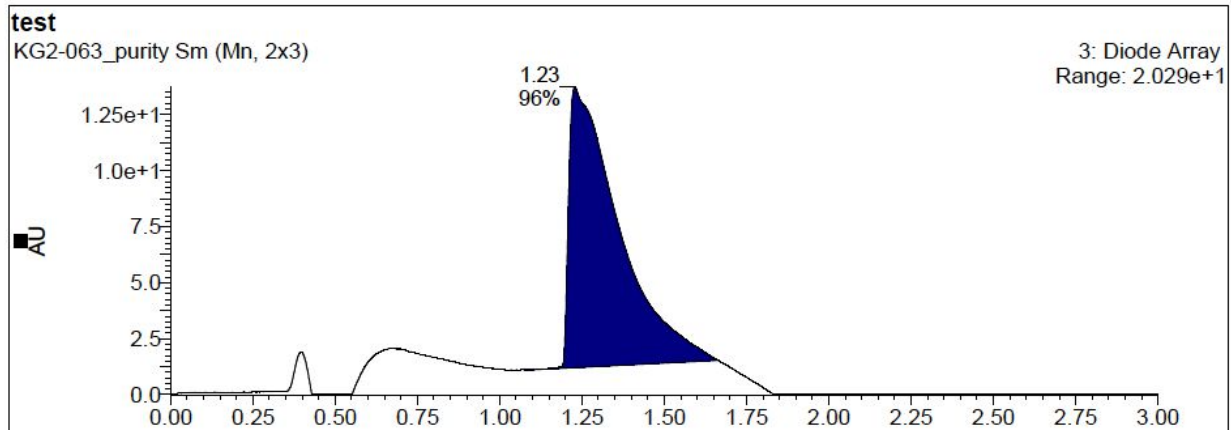

### 18i

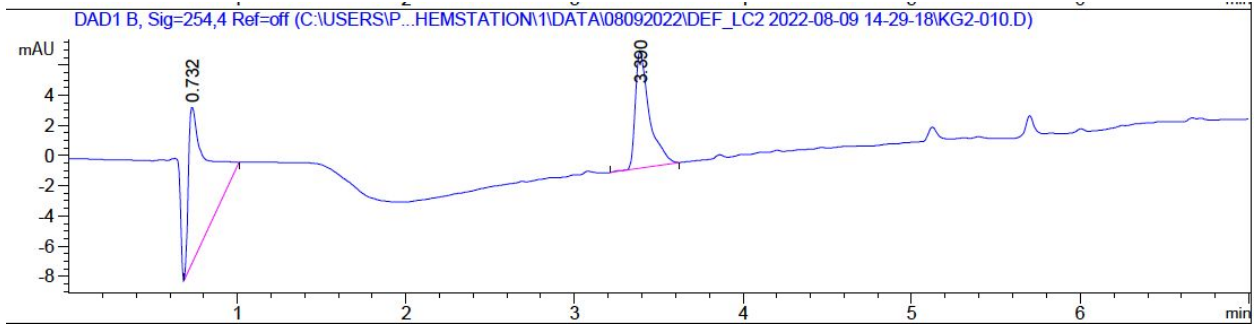

### 18j

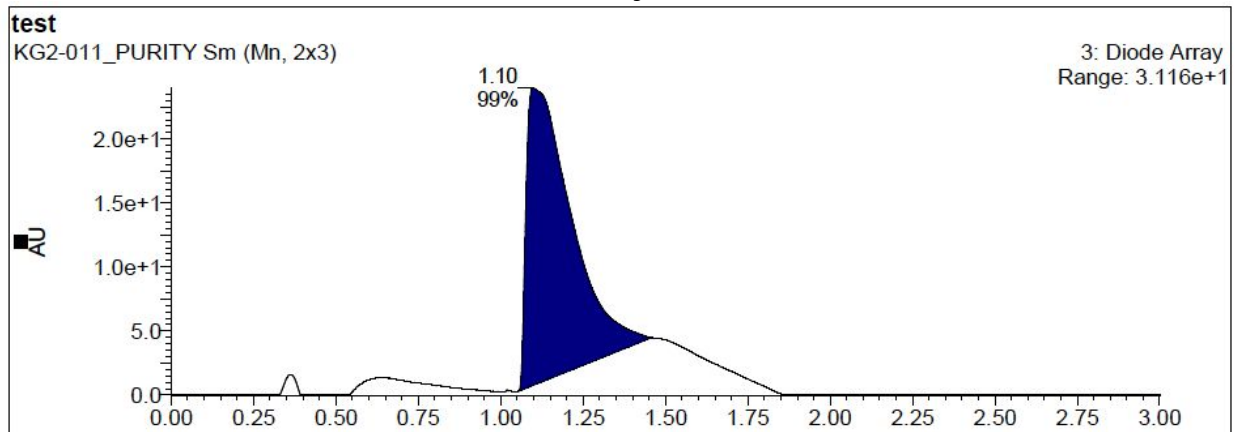

### 18k

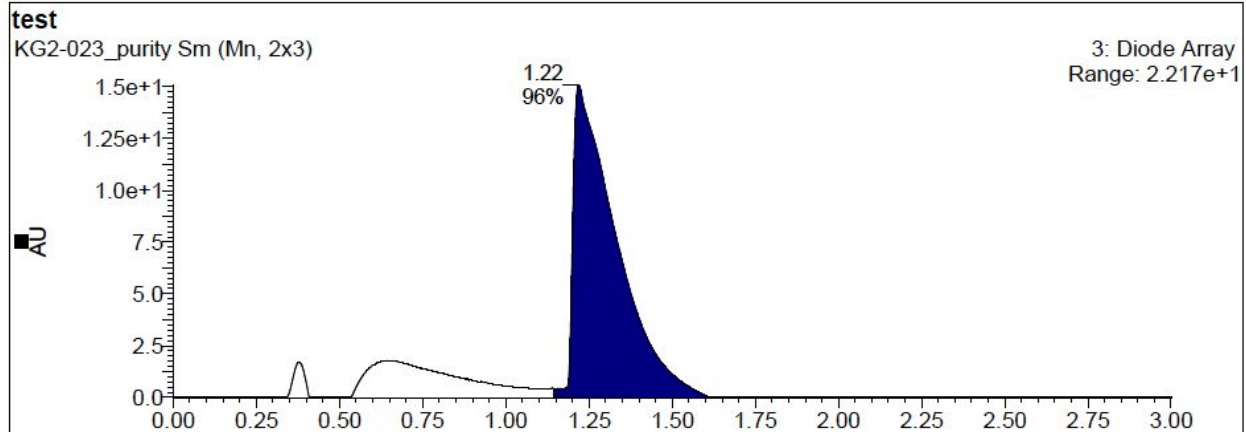

### 18m

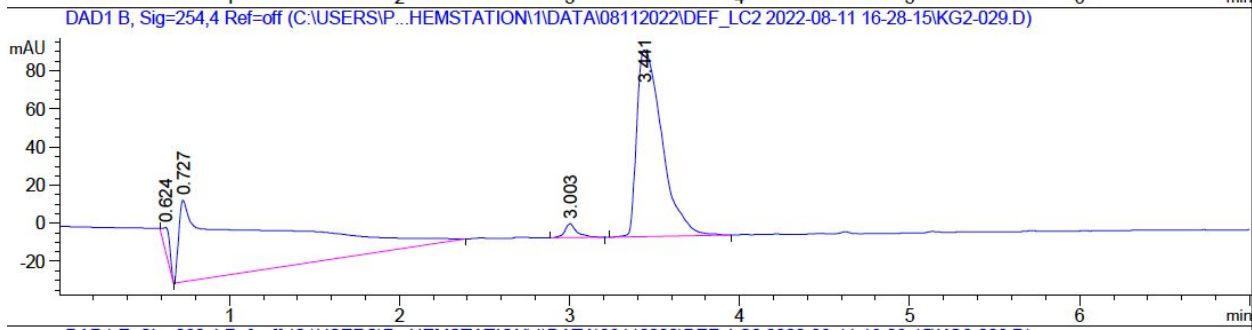

### 18n

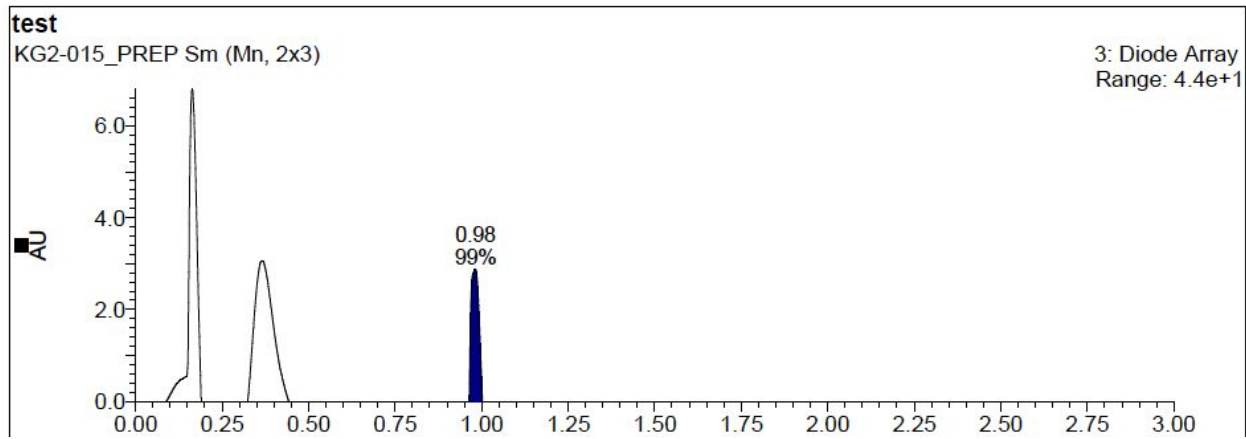

### 18o

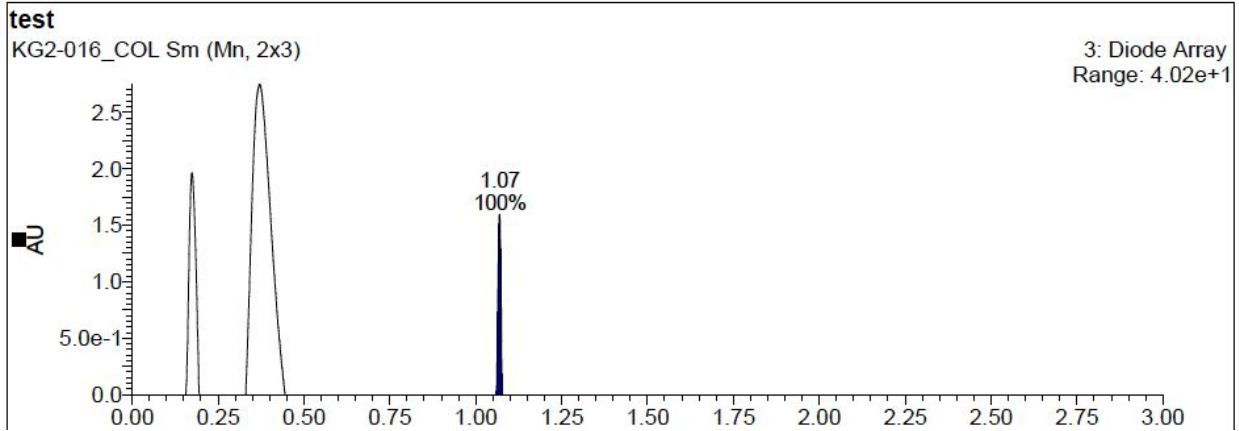

### 18p

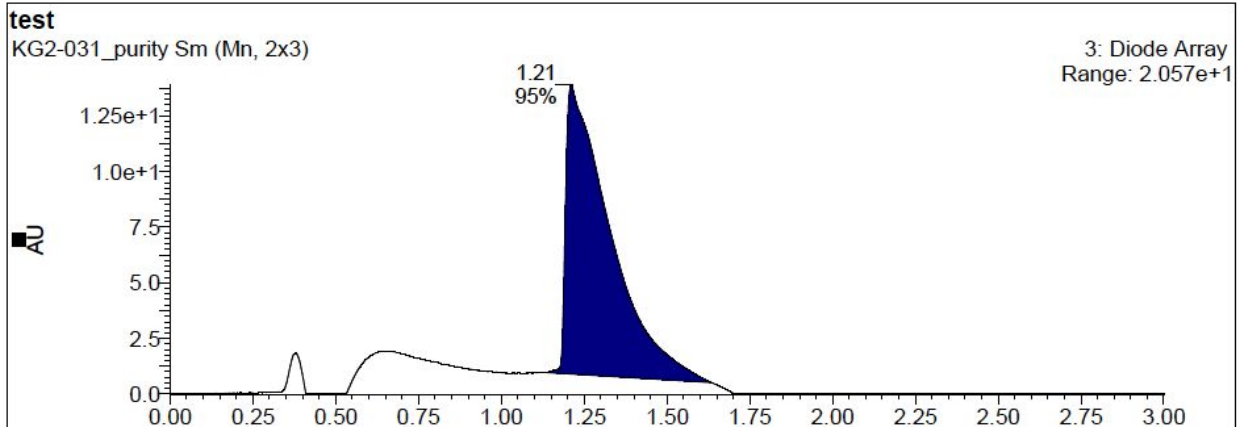

### 18q

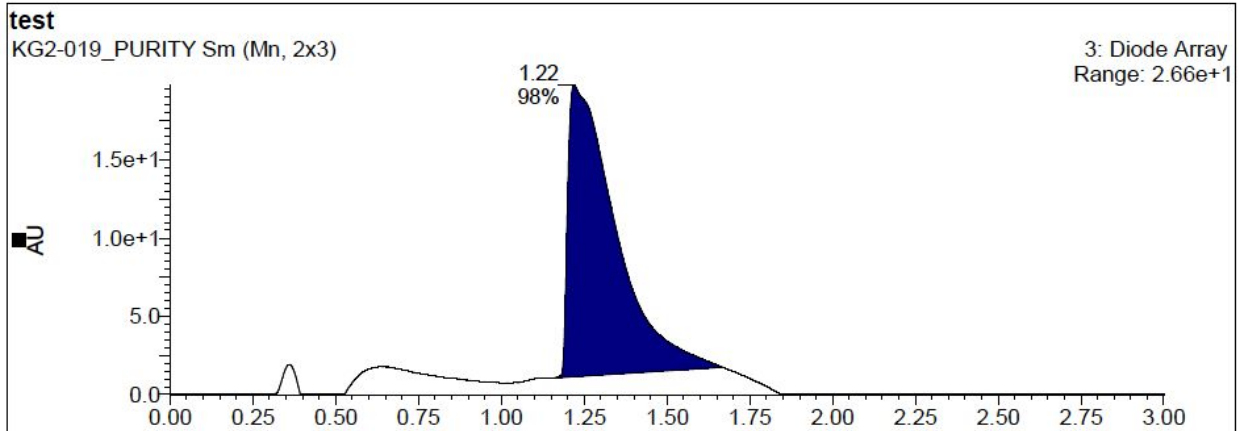

### 18r

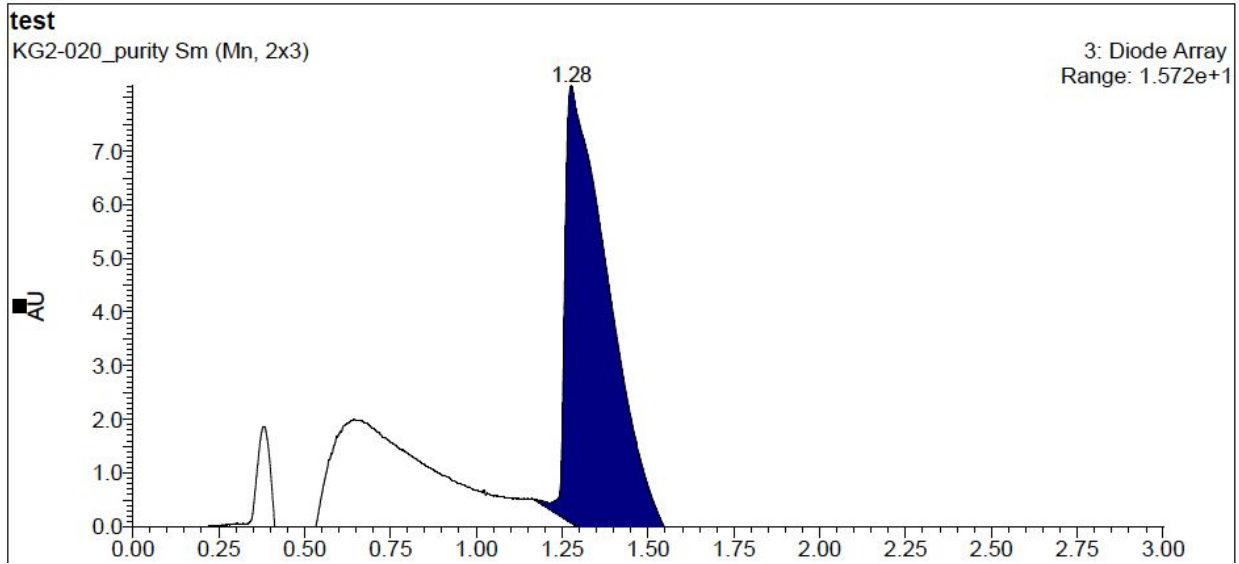

### 18s

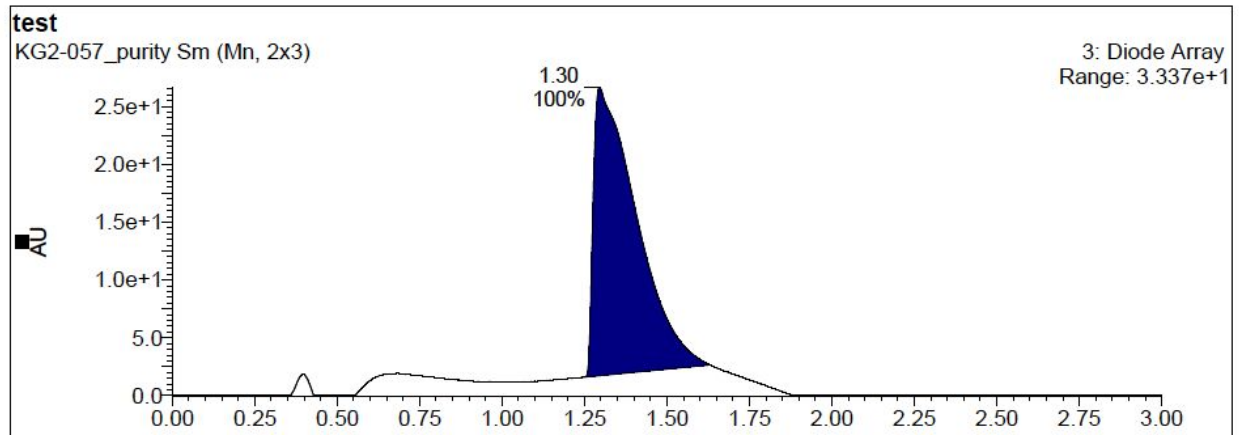

### 18t

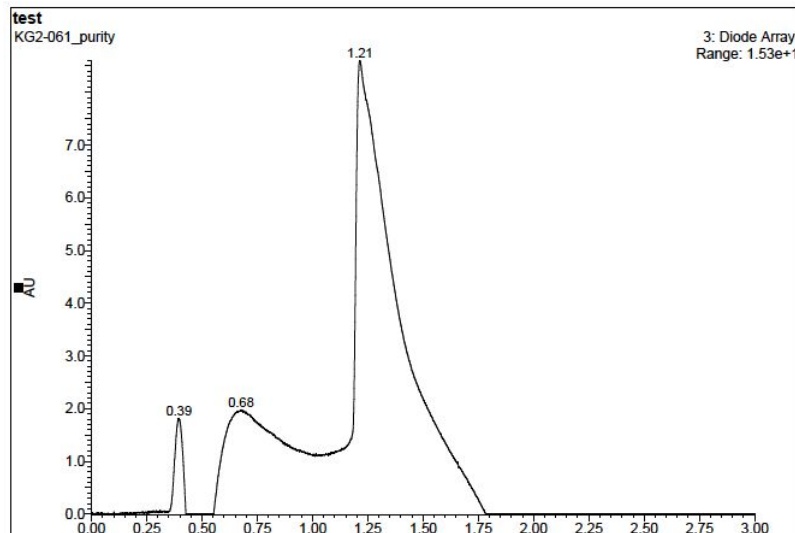



**23a**

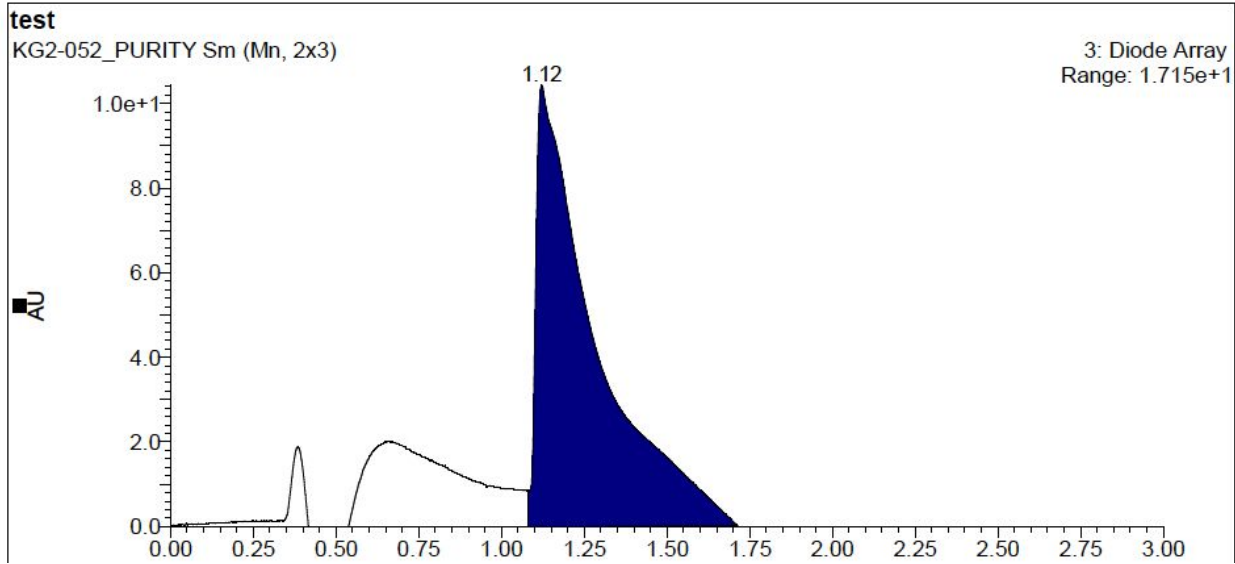

**23b**

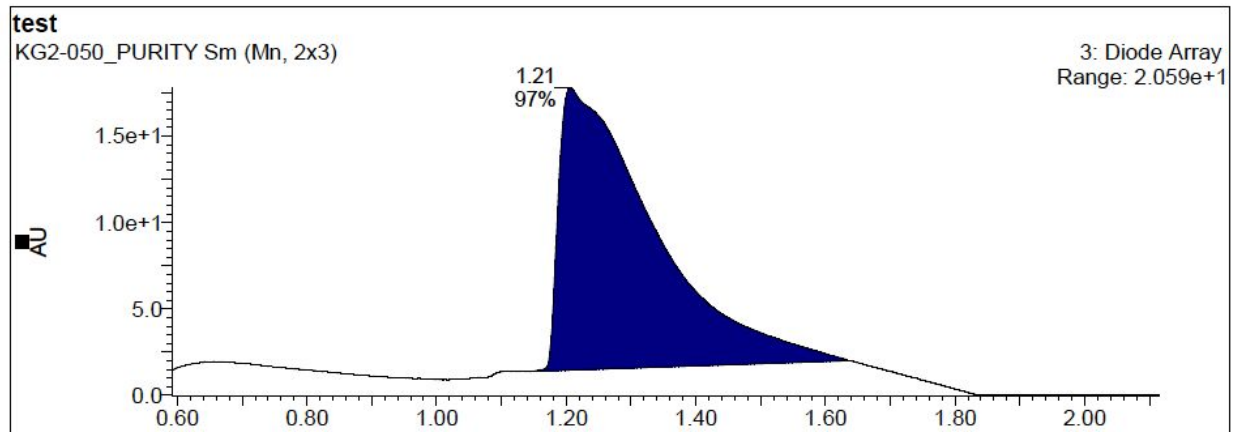

**23c**

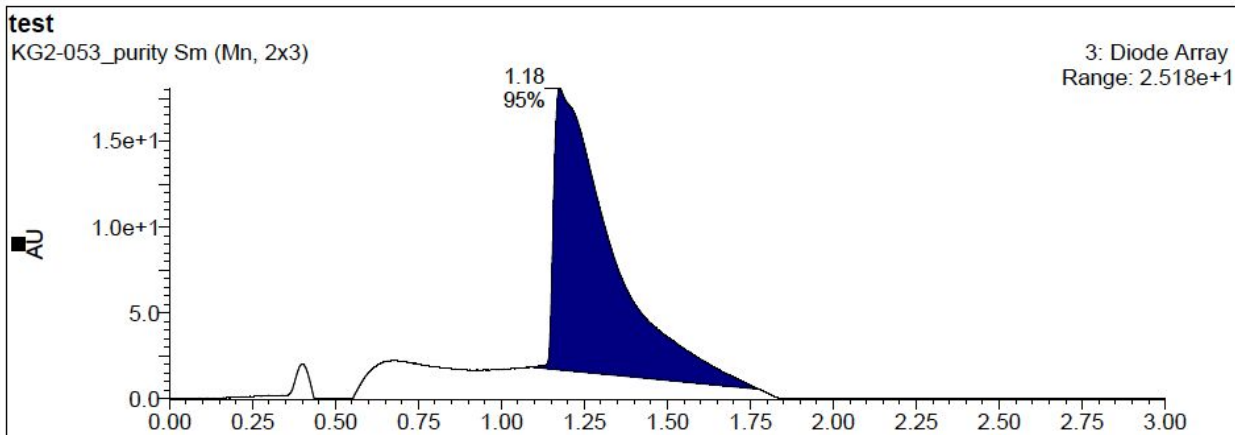

### 23d

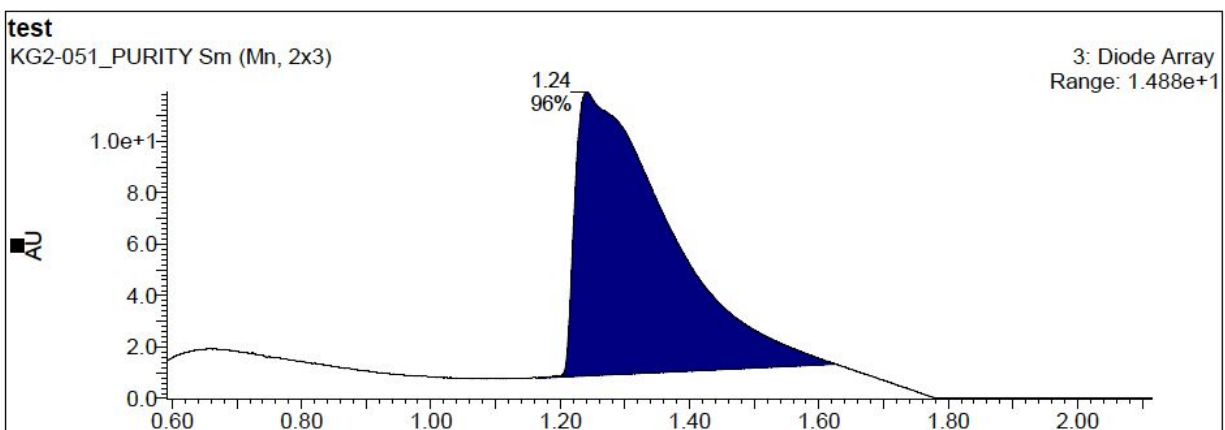

### 23e

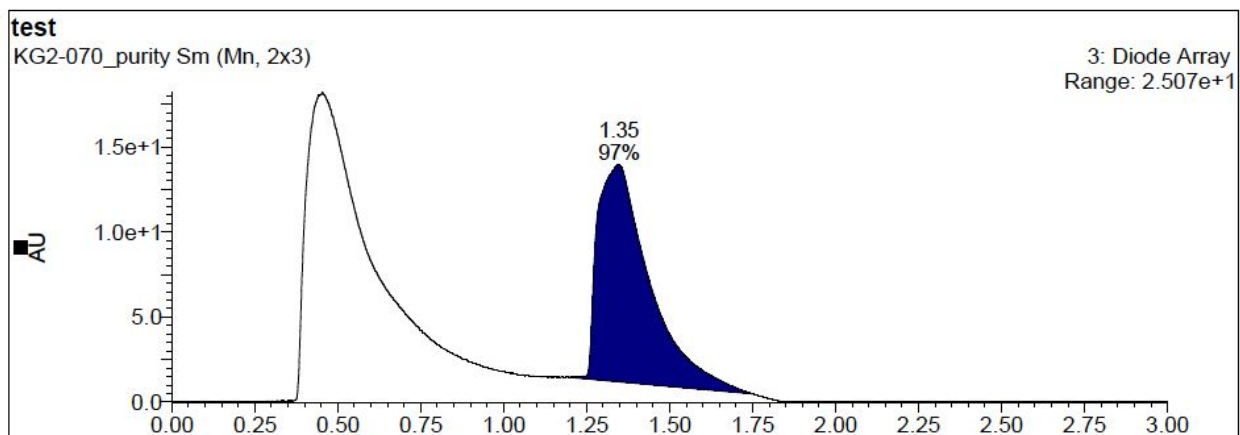

### 23f

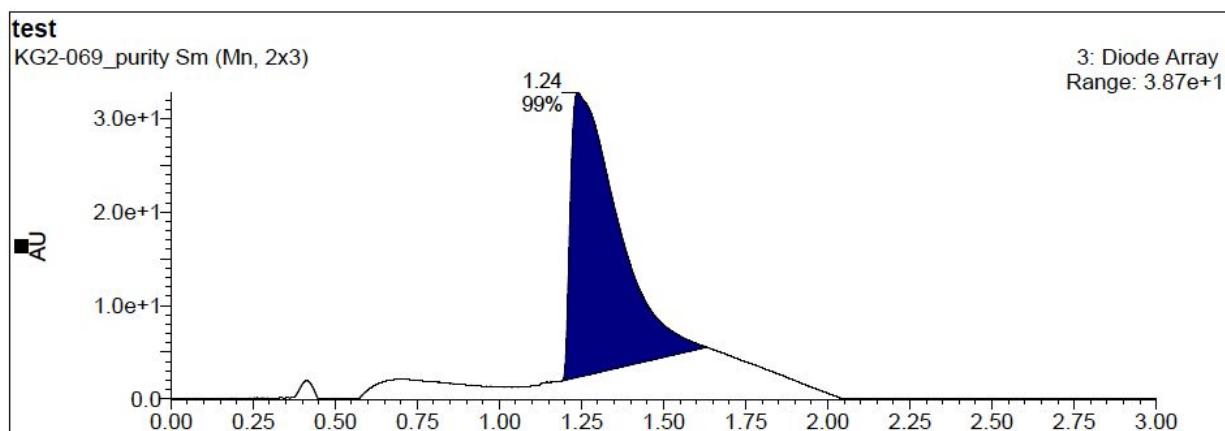

# 23g

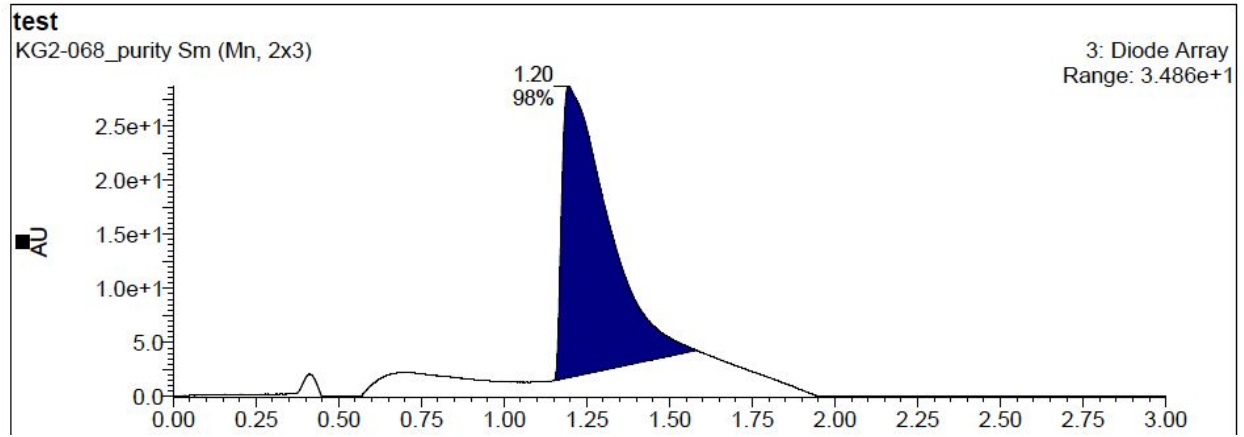

Supplement: jm2c00996_si_001.pdf [file jm2c00996_si_001.pdf]
